# Supplementary material for: Tandem additions of 3,4-dihydroisoquinolines to γ-hydroxy-α,β-unsaturated ketones: a green and new access to oxazolo[2,3-a]tetrahydroisoquinolines
Source: Royal Society of Chemistry journal article supplement (doi:10.1039/c6ra20708a), 2016-01-01
Supplement: c6ra20708a1.pdf [file c6ra20708a1.pdf]

## Supporting Information

### **Tandem additions of 3,4-dihydroisoquinolines to $\gamma$ -hydroxy - $\alpha,\beta$ -unsaturated ketones: a green and new access to oxazolo [2,3-a]tetrahydroisoquinolines**

Sheng-Han Huang, Yu-Wei Shih, Wen-Tse Huang, Deng-Hong Li and Te-Fang  
Yang\*

*Department of Applied Chemistry, National Chi Nan University, 1, University Road,  
Puli, 545, Nantou, Taiwan; E-mail: [tfyang@ncnu.edu.tw](mailto:tfyang@ncnu.edu.tw)*

#### Content

|                                                                                           |            |
|-------------------------------------------------------------------------------------------|------------|
| <b>1. General information .....</b>                                                       | <b>s2</b>  |
| <b>2. General procedures for the synthesis of <math>\gamma</math>-Hydroxyenones .....</b> | <b>s2</b>  |
| <b>3. Characterization data of products .....</b>                                         | <b>s3</b>  |
| <b>4. Reference .....</b>                                                                 | <b>s15</b> |
| <b>5. NMR Spectra of products .....</b>                                                   | <b>s16</b> |
| <b>6. X-ray Crystallographic Data of compound 3a .....</b>                                | <b>s62</b> |

## General information

Reactions were carried out in round bottom flasks fitted with rubber septa under argon. Crude product solutions were dried on  $\text{Na}_2\text{SO}_4$  and concentrated with a rotary evaporator below  $40\text{ }^\circ\text{C}$  at  $\sim 30$  Torr. Silica gel column chromatography was performed employing 230 - 400 mesh silica gel. Proton nuclear magnetic resonance ( $^1\text{H}$  NMR) and carbon nuclear magnetic resonance ( $^{13}\text{C}$  NMR) spectra were obtained using Bruker Avance II (300 MHz) NMR spectrometer. Chemical shifts ( $\delta$  scale) were expressed in parts per million downfield from tetramethylsilane ( $\delta = 0.00$ ).  $^1\text{H}$  NMR data were presented as follows: chemical shift, multiplicity (s = singlet, br = broad singlet, d = doublet, t = triplet, m = multiplet and/or multiple resonances), coupling constant in Hz (Hertz), integration. High-resolution mass spectra were determined on a Jasco JMS-HX 110 spectrometer. Reactions were monitored by thin layer chromatography (TLC) on Silicycle siliaplate<sup>TM</sup>G TLC plates (F-254 indicator).

## General procedures for the synthesis of $\gamma$ -Hydroxyenones

### Scheme 1. Synthesis of $\gamma$ -Hydroxyenones (2a-g)

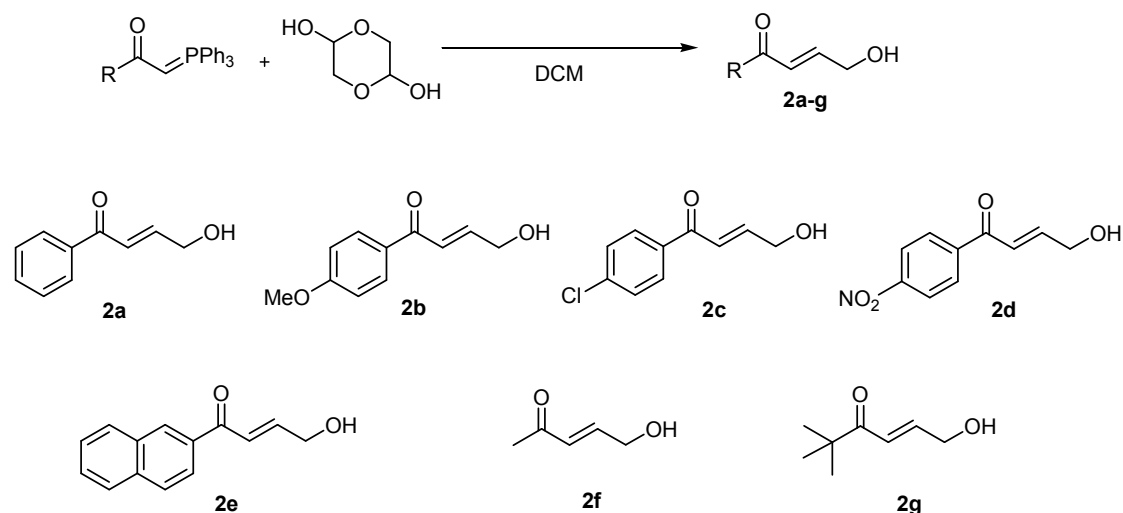

To a solution of appropriate stabilizes ylide (1.5 mmol) in dry THF (30 mL) as added glycolaldehyde dimer (0.7 mmol), and the resulting solution was heated under reflux for 3 h. The

solution was cooled and concentrated under reduced pressure. The product was purified by chromatography(ethyl acetate: hexane = 1:1 ) to give the  $\gamma$ -Hydroxyenones (**2a-g**).

#### Characterization data of products

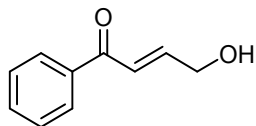

##### **(E)-4-hydroxy-1-phenylbut-2-en-1-one (2a).**

physical state: white solid; yield: 98% ; mp.:110-112 °C; <sup>1</sup>H NMR (300 MHz, CDCl<sub>3</sub>)  $\delta$  7.93 (d, 2H,  $J = 7.5$  Hz), 7.53 (t, 1H,  $J = 7.2$  Hz), 7.42 (t, 2H,  $J = 7.2$  Hz), 7.08-7.29 (m, 2H), 4.44 (s, 2H), 3.64 (s, 1H); <sup>13</sup>C NMR (75 MHz CDCl<sub>3</sub>)  $\delta$  190.9, 148.1, 137.1, 132.9, 128.4, 123.2, 61.7.

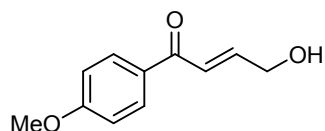

##### **(E)-1-(4-methoxyphenyl)-4-hydroxybut-2-en-1-one (2b).**

physical state: white solid; yield: 91% ; mp: 90-92 °C; <sup>1</sup>H NMR (300 MHz, CDCl<sub>3</sub>)  $\delta$  7.99 (dt,  $J = 9, 2.7$  Hz, 2H), 7.26-7.20 (m, 1H), 7.11 (dt,  $J = 15.3, 3.6$  Hz, 1H), 6.95 (dt,  $J = 9, 3$  Hz, 2H), 4.48-4.46 (m, 2H), 3.88 (s, 3H); <sup>13</sup>C NMR (75 MHz CDCl<sub>3</sub>)  $\delta$  188.9, 163.7, 146.4, 131.2, 130.7, 123.7, 114.0, 62.6, 55.7.

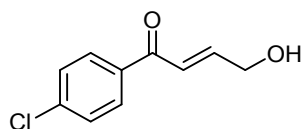

##### **(E)-1-(4-Chlorophenyl)-4-hydroxybut-2-ene-1-one (2c).**

physical state: yellow solid; yield: 91% ; mp: 39-40 °C; <sup>1</sup>H NMR (300 MHz, CDCl<sub>3</sub>)  $\delta$  7.89 (d,  $J = 7.89$  Hz, 2H), 7.43 (d,  $J = 8.7$  Hz, 2H), 7.22-7.10 (m, 2H), 4.47 (s, 2H), 2.55 (brs, 1H); <sup>13</sup>C NMR (75 MHz CDCl<sub>3</sub>)  $\delta$  189.3, 147.9, 139.5, 135.9, 130.1, 129.0, 123.2, 62.3.

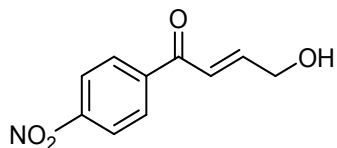

##### **(E)-1-(4-nitrophenyl)-4-hydroxybut-2-ene-1-one (2d).**

physical state: yellow solid; yield: 64% ; mp: 95-96 °C; <sup>1</sup>H NMR (300 MHz, CDCl<sub>3</sub>)  $\delta$  8.33 (d,  $J = 8.7$  Hz, 2H), 8.11 (d,  $J = 8.7$  Hz, 2H), 7.23-7.22 (m, 2H), 4.53 (s, 2H), 1.84 (brs, 1H); <sup>13</sup>C NMR (75 MHz CDCl<sub>3</sub>)  $\delta$  188.9, 150.2, 149.4, 142.5, 129.6, 123.9, 123.1, 62.3; HRMS: Calcd. for C<sub>11</sub>H<sub>12</sub>O<sub>3</sub>: 207.0532. Found: 207.0523.

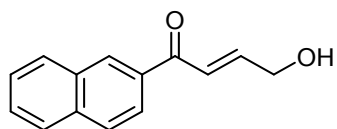

**(E)-4-Hydroxy-10-(naphthalene-2-yl)but-2-ene-1-one (2e).**

physical state: yellow solid; yield: 96% ; mp: 35-36 °C;  $^1\text{H NMR}$  (300 MHz,  $\text{CDCl}_3$ )  $\delta$  8.49 (s, 1H), 8.05 (dd,  $J = 8.7, 1.5$  Hz, 1H), 7.96-7.85 (m, 3H), 7.62-7.51 (m, 2H), 7.40 (dt,  $J = 15.3, 1.8$  Hz, 1H), 7.26-7.17 (m, 1H), 4.52 (s, 2H), 2.24 (brs, 1H);  $^{13}\text{C NMR}$  (75 MHz  $\text{CDCl}_3$ )  $\delta$  190.7, 147.9, 135.4, 134.6, 132.3, 130.4, 29.5, 128.5, 127.7, 126.7, 124.2, 123.5, 62.2.

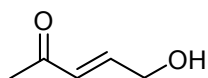

**(E)-1-methyl-4-hydroxybut-2-ene-1-one (2f).**

physical state: colorless oil; yield: 84%;  $^1\text{H NMR}$  (300 MHz,  $\text{CDCl}_3$ )  $\delta$  6.88 (dt,  $J = 15.9, 3.9$  Hz, 1H), 6.35 (dt,  $J = 15.9, 2.1$  Hz, 1H), 4.38 (s, 2H), 2.28 (s, 3H);  $^{13}\text{C NMR}$  (75 MHz  $\text{CDCl}_3$ )  $\delta$  198.6, 145.9, 129.1, 61.9, 27.5..

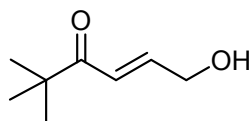

**(E)-1-tert-butyl-4-hydroxybut-2-ene-1-one (2g).**

physical state: colorless oil; yield: 67%;  $^1\text{H NMR}$  (300 MHz,  $\text{CDCl}_3$ )  $\delta$  7.01 (dt,  $J = 15.3, 3.9$  Hz, 1H), 6.80 (dt,  $J = 15.3, 1.8$  Hz, 1H), 4.40-4.37 (m, 2H), 1.83 (brs, 1H), 1.17 (s, 9H);  $^{13}\text{C NMR}$  (75 MHz  $\text{CDCl}_3$ )  $\delta$  204.3, 145.1, 122.5, 62.4, 43.2, 26.2.

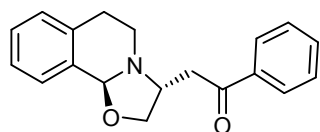

**3-(2-phenyl-2-oxo-ethyl)-oxazolo[2,3-a]tetrahydroisoquinoline (3a).**

Recrystallized from ethyl acetate/hexane, yield: 93% (15:1 mixture of two diastereomers); physical state: white solid; mp 124-125 °C;  $^1\text{H NMR}$  (300 MHz,  $\text{CDCl}_3$ )  $\delta$  7.97 (d,  $J = 7.5$  Hz, 2H), 7.58-7.37 (m, 4H), 7.25-7.12 (m, 3H), 5.29 (s, 1H), 4.37 (t,  $J = 7.8$  Hz, 1H), 3.93-3.85 (m, 1H), 3.58-3.45 (m, 2H), 3.16 (dd,  $J = 17.7, 7.8$  Hz, 1H), 3.03-2.85 (m, 3H), 2.71 (d,  $J = 12$  Hz, 1H);  $^{13}\text{C NMR}$  (75 MHz,  $\text{CDCl}_3$ )  $\delta$  198.6, 136.9, 135.5, 133.3, 131.8, 128.9, 128.7, 128.3, 128.1, 126.3, 89, 69.3, 62.2, 46.9, 43.6, 29.8; HRMS: Calcd. for  $\text{C}_{19}\text{H}_{19}\text{NO}_2$ : 293.1416. Found: 293.1413.

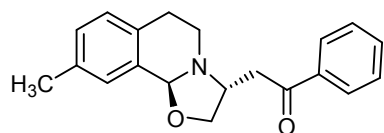

**9-methyl-3-(2-phenyl-2-oxo-ethyl)-oxazolo[2,3-a]tetrahydroisoquinoline (3b).**

Recrystallized from ethyl acetate/hexane, yield: 95% (14:1 mixture of two diastereomers); physical state: white solid; mp 122-124 °C; <sup>1</sup>H NMR (300 MHz, CDCl<sub>3</sub>) δ 7.98 (d, *J* = 7.5 Hz, 2H), 7.60-7.44 (m, 3H), 7.21-7.05 (m, 3H), 5.27 (s, 1H), 4.37 (t, *J* = 7.5 Hz, 1H), 3.93-3.85 (m, 1H), 3.59-3.46 (m, 2H), 3.17 (dd, *J* = 17.7, 7.8 Hz, 1H), 2.98-2.90 (m, 3H), 2.71-2.66 (m, 1H), 2.32 (s, 3H); <sup>13</sup>C NMR (75 MHz, CDCl<sub>3</sub>) δ 198.7, 136.9, 135.9, 133.4, 132.4, 131.6, 129.3, 128.7, 128.3, 128.1, 128.0, 89.2, 69.4, 62.3, 47.2, 43.6, 29.4, 21.1; HRMS: Calcd. for C<sub>20</sub>H<sub>21</sub>NO<sub>2</sub>: 307.1572. Found: 307.1573.

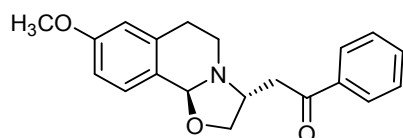

**8-methoxy-3-(2-phenyl-2-oxo-ethyl)-oxazolo[2,3-a]tetrahydroisoquinoline (3c).**

Recrystallized from ethyl acetate/hexane, yield: 95% (19:1 mixture of two diastereomers); physical state: white solid; mp 106-108 °C; <sup>1</sup>H NMR (300 MHz, CDCl<sub>3</sub>) δ 7.98 (d, *J* = 7.5 Hz, 2H), 7.58 (t, *J* = 7.5 Hz, 1H), 7.48 (t, *J* = 7.2 Hz, 2H), 7.06 (d, *J* = 8.4 Hz, 1H), 6.92 (d, *J* = 2.7 Hz, 1H), 6.83 (dd, *J* = 8.4, 2.7 Hz, 1H), 5.28 (s, 1H), 4.38 (t, *J* = 7.5 Hz, 1H), 3.95-3.86 (m, 7.2 Hz, 1H), 3.80 (s, 3H), 3.59-3.47 (m, 2H), 3.19 (dd, *J* = 17.7, 7.8 Hz, 1H), 2.99-2.88 (m, 3H), 2.71-2.64 (m, 1H); <sup>13</sup>C NMR (75 MHz, CDCl<sub>3</sub>) δ 198.7, 158.1, 136.9, 133.4, 132.8, 129.2, 128.7, 128.1, 127.6, 115.6, 112.7, 89.3, 69.4, 62.2, 55.4, 47.4, 43.6, 29.0; HRMS: Calcd. for C<sub>20</sub>H<sub>21</sub>NO<sub>3</sub>: 323.1521. Found: 323.1526.

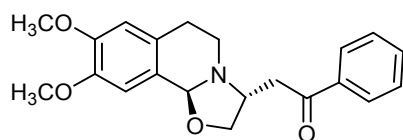

**8,9-dimethoxy-3-(2-phenyl-2-oxo-ethyl)-oxazolo[2,3-a]tetrahydroisoquinoline (3d).**

Recrystallized from ethyl acetate/hexane, yield: 95% (17:1 mixture of two diastereomers); physical state: white solid; mp: 126 °C; <sup>1</sup>H NMR (300 MHz, CDCl<sub>3</sub>) δ 7.98 (d, *J* = 7.8 Hz, 2H), 7.58 (t, *J* = 7.2 Hz, 1H), 7.47 (t, *J* = 7.5 Hz, 2H), 6.88 (s, 1H), 6.62 (s, 1H), 5.24 (s, 1H), 4.39 (t, *J* = 8.1 Hz, 1H), 3.86 (d, *J* = 3.3 Hz, 6H), 3.59-3.45 (m, 2H), 3.18 (dd, *J* = 17.4, 7.8 Hz, 1H), 2.99-2.90 (m, 3H), 2.70-2.57 (m, 1H); <sup>13</sup>C NMR (75 MHz, CDCl<sub>3</sub>) δ 198.5, 148.9, 147.5, 136.7, 133.2, 128.6, 127.9, 123.6, 110.9, 110.4, 88.9, 69.2, 62.0, 55.8, 47.0, 43.5, 29.3; HRMS: Calcd. for C<sub>21</sub>H<sub>23</sub>NO<sub>4</sub>: 353.1627. Found: 353.1624.

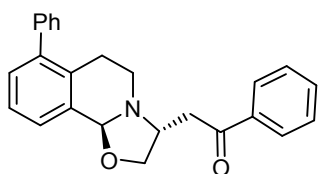

**3-(2-phenyl-2-oxo-ethyl)-7-phenyl-oxazolo[2,3-a]tetrahydroisoquinoline (3e).**

Recrystallized from ethyl acetate/hexane, yield: 90% (19:1 mixture of two diastereomers); physical state: white solid; mp 114-117 °C; <sup>1</sup>H NMR (300 MHz, CDCl<sub>3</sub>) δ 7.98 (d, *J* = 8.4 Hz, 2H), 7.60-7.22 (m, 11H), 5.39 (s, 1H), 4.38 (t, *J* = 7.5 Hz, 1H), 3.93-3.85 (m, 1H), 3.60-3.48 (m, 2H), 3.20 (dd, *J* = 17.4, 7.8 Hz, 1H), 2.97-2.74 (m, 3H), 2.57 (d, *J* = 15.3 Hz, 1H); <sup>13</sup>C NMR (75 MHz, CDCl<sub>3</sub>) δ 198.6, 141.2, 140.9, 136.9, 133.4, 133.2, 132.3, 129.7, 129.2, 128.7, 128.2, 128.1, 127.1, 126.3, 89.5, 69.3, 62.4, 47.2, 43.6, 28.8; HRMS: Calcd. for C<sub>25</sub>H<sub>23</sub>NO<sub>2</sub>: 369.1729. Found: 369.1735.

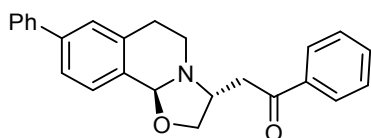

**3-(2-phenyl-2-oxo-ethyl)-8-phenyl-oxazolo[2,3-a]tetrahydroisoquinoline (3f).**

Recrystallized from ethyl acetate/hexane, yield: 93% (25:1 mixture of two diastereomers); physical state: white solid; mp 132-135 °C; <sup>1</sup>H NMR (300 MHz, CDCl<sub>3</sub>) δ 7.98 (d, *J* = 7.5 Hz, 2H), 7.57-7.55 (m, 3H), 7.48-7.30 (m, 8H), 5.34 (s, 1H), 4.38 (t, *J* = 7.5 Hz, 1H), 3.96-3.87 (m, Hz, 1H), 3.59-3.48 (m, 2H), 3.17 (dd, *J* = 17.7, 7.8 Hz, 1H), 3.07-2.89 (m, 3H), 2.77 (d, *J* = 14.1 Hz, 1H); <sup>13</sup>C NMR (75 MHz, CDCl<sub>3</sub>) δ 198.6, 141.3, 140.8, 136.9, 135.9, 133.3, 130.9, 129.3, 128.8, 128.7, 128.1, 127.4, 127.2, 126.8, 125.3, 89.0, 69.4, 62.3, 47.0, 43.6, 30.0; .HRMS: Calcd. for C<sub>25</sub>H<sub>23</sub>NO<sub>2</sub>: 369.1729. Found: 369.1732.

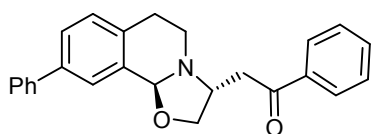

**3-(2-phenyl-2-oxo-ethyl)-9-phenyl-oxazolo[2,3-a]tetrahydroisoquinoline (3g).**

Recrystallized from ethyl acetate/hexane, yield: 97% (19:1 mixture of two diastereomers); physical state: white solid; mp 134-137 °C; <sup>1</sup>H NMR (300 MHz, CDCl<sub>3</sub>) δ 7.99 (d, *J* = 7.2 Hz, 2H), 7.63-7.55 (m, 4H), 7.49-7.39 (m, 4H), 7.34-7.29 (m, 1H), 7.24-7.20 (m, 1H), 5.36 (s, 1H), 4.40 (t, *J* = 7.8 Hz, 1H), 3.97-3.88 (m, 1H), 3.60-3.49 (m, 2H), 3.19 (dd, *J* = 17.7, 7.8 Hz, 1H), 3.07-2.89 (m, 3H), 2.76 (d, *J* = 11.1 Hz, 1H); <sup>13</sup>C NMR (75 MHz, CDCl<sub>3</sub>) δ 198.7, 140.8, 139.5, 136.9, 134.7, 133.4, 132.3, 128.8, 128.6, 128.1, 127.6, 127.3, 127.2, 127.1, 89.2, 69.5, 62.3, 47.1, 43.7, 29.6; HRMS: Calcd. for C<sub>25</sub>H<sub>23</sub>NO<sub>2</sub>: 369.1729. Found: 369.1721.

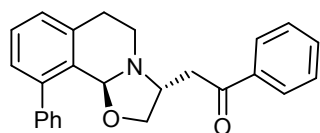

**3-(2-phenyl-2-oxo-ethyl)-10-phenyl-oxazolo[2,3-a]tetrahydroisoquinoline (3h).**

Recrystallized from ethyl acetate/hexane, yield: 91% (19:1 mixture of two diastereomers); physical state: white solid; mp 120-123 °C;  $^1\text{H}$  NMR (300 MHz,  $\text{CDCl}_3$ )  $\delta$  7.89 (d,  $J = 7.2$  Hz, 2H), 7.55-7.24 (m, 10H), 7.16-7.09 (m, 2H), 4.96 (s, 1H), 4.30 (t,  $J = 8.1$  Hz, 1H), 3.93-3.74 (m, 1H), 3.41 (dd,  $J = 17.7, 6.0$  Hz, 1H), 3.13 (dd,  $J = 8.7, 5.1$  Hz, 1H), 3.09-2.75 (m, 5H);  $^{13}\text{C}$  NMR (75 MHz,  $\text{CDCl}_3$ )  $\delta$  198.5, 143.5, 140.7, 136.7, 135.9, 133.3, 129.7, 128.6, 128.3, 128.0, 127.7, 127.5, 127.0, 86.9, 69.0, 61.8, 47.0, 43.7, 30.1; HRMS: Calcd. for  $\text{C}_{25}\text{H}_{23}\text{NO}_2$ : 369.1729. Found: 369.1723.

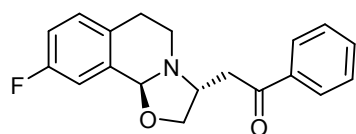

**9-fluoro-3-(2-phenyl-2-oxo-ethyl)-oxazolo[2,3-a]tetrahydroisoquinoline (3i).**

Recrystallized from ethyl acetate/hexane, yield: 87% (19:1 mixture of two diastereomers); physical state: white solid; mp 110-112 °C;  $^1\text{H}$  NMR (300 MHz,  $\text{CDCl}_3$ )  $\delta$  7.97 (d,  $J = 7.5$  Hz, 2H), 7.59-7.43 (m, 3H), 7.11-7.06 (m, 2H), 6.94 (td,  $J = 8.7, 2.7$  Hz, 1H), 5.23 (s, 1H), 4.35 (t,  $J = 7.8$  Hz, 1H), 3.94-3.85 (m, 1H), 3.56-3.45 (m, 2H), 3.15 (dd,  $J = 17.7, 7.8$  Hz, 1H), 3.00-2.87 (m, 3H), 2.72-2.65 (m, 1H);  $^{13}\text{C}$  NMR (75 MHz,  $\text{CDCl}_3$ )  $\delta$  198.4, 161.2 (d,  $J = 242.6$  Hz), 136.8, 133.7 (d,  $J = 7.5$  Hz), 133.3, 131.1, 129.6 (d,  $J = 7.5$  Hz), 128.7, 128.0, 115.5 (d,  $J = 89.1$  Hz), 115.2 (d,  $J = 90.6$  Hz), 88.6, 69.3, 62.0, 46.9, 43.4, 29.0; HRMS: Calcd. for  $\text{C}_{19}\text{H}_{18}\text{FNO}_2$ : 311.1322. Found: 311.1325.

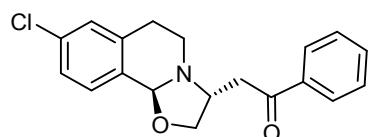

**8-chloro-3-(2-phenyl-2-oxo-ethyl)-oxazolo[2,3-a]tetrahydroisoquinoline (3j).**

Recrystallized from ethyl acetate/hexane, yield: 91% (14:1 mixture of two diastereomers); physical state: white solid; mp 113-115 °C;  $^1\text{H}$  NMR (300 MHz,  $\text{CDCl}_3$ )  $\delta$  7.97 (d,  $J = 7.2$  Hz, 2H), 7.61-7.45 (m, 3H), 7.32 (d,  $J = 8.1$  Hz, 1H), 7.23-7.14 (m, 2H), 5.24 (s, 1H), 4.37 (t,  $J = 7.8$  Hz, 1H), 3.94-3.86 (m, 1H), 3.57-3.45 (m, 2H), 3.17 (dd,  $J = 17.7, 7.8$  Hz, 1H), 3.00-2.83 (m, 3H), 2.73-2.67 (m, 1H);  $^{13}\text{C}$  NMR (75 MHz,  $\text{CDCl}_3$ )  $\delta$  198.4, 137.4, 136.7, 133.9, 133.3, 130.3, 130.2, 128.6, 128.0, 127.9, 126.6, 88.4, 69.3, 62.0, 46.4, 43.4, 29.6; HRMS: Calcd. for  $\text{C}_{19}\text{H}_{18}\text{ClNO}_2$ : 327.1026. Found: 327.1034.

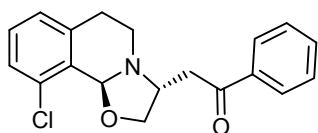

**10-chloro-3-(2-phenyl-2-oxo-ethyl)-oxazolo[2,3-a]tetrahydroisoquinoline (3k).**

Recrystallized from ethyl acetate/hexane, yield: 80% (14:1 mixture of two diastereomers); physical state: white solid; mp 110-112 °C;  $^1\text{H}$  NMR (300 MHz,  $\text{CDCl}_3$ )  $\delta$  7.96 (d,  $J = 7.5$  Hz, 2H), 7.56 (t,  $J = 7.2$  Hz, 1H), 7.46 (t,  $J = 7.8$  Hz, 2H), 7.25 (d,  $J = 7.5$  Hz, 1H), 7.18 (d,  $J = 7.5$  Hz, 1H), 7.04 (d,  $J = 7.2$  Hz, 1H), 5.35 (s, 1H), 4.38 (t,  $J = 7.8$  Hz, 1H), 3.97-3.88 (m, 1H), 3.59-3.51 (m, 2H), 3.19 (dd,  $J = 17.7, 7.5$  Hz, 1H), 3.05-2.90 (m, 3H), 2.78-2.72 (m, 1H);  $^{13}\text{C}$  NMR (75 MHz,  $\text{CDCl}_3$ )  $\delta$  198.4, 138.2, 136.8, 134.9, 133.3, 129.4, 129.3, 128.7, 128.0, 127.6, 126.8, 86.6, 69.0, 61.7, 46.5, 43.5, 30.1; HRMS: Calcd. for  $\text{C}_{19}\text{H}_{18}\text{ClNO}_2$ : 327.1026. Found: 327.1029.

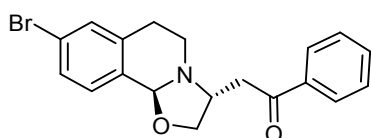

**8-bromo-3-(2-phenyl-2-oxo-ethyl)-oxazolo[2,3-a]tetrahydroisoquinoline (3l).**

Recrystallized from ethyl acetate/hexane, yield: 93% (14:1 mixture of two diastereomers); physical state: white solid; mp 102-105 °C;  $^1\text{H}$  NMR (300 MHz,  $\text{CDCl}_3$ )  $\delta$  7.97 (d,  $J = 7.5$  Hz, 2H), 7.55-7.60 (m, 1H), 7.47 (t,  $J = 7.5$  Hz, 2H), 7.38-7.31 (m, 2H), 7.27-7.24 (m, 1H), 5.22 (s, 1H), 4.36 (t,  $J = 7.8$  Hz, 1H), 3.94-3.85 (m, 1H), 3.57-3.45 (m, 2H), 3.16 (dd,  $J = 17.7, 7.8$  Hz, 1H), 3.00-2.85 (m, 3H), 2.73-2.65 (m, 1H);  $^{13}\text{C}$  NMR (75 MHz,  $\text{CDCl}_3$ )  $\delta$  198.5, 137.9, 136.8, 133.4, 131.0, 130.5, 129.6, 128.7, 128.1, 122.3, 88.6, 69.4, 62.2, 46.5, 43.6, 29.7;  $\square$ HRMS: Calcd. for  $\text{C}_{19}\text{H}_{18}\text{BrNO}_2$ : 371.0521. Found: 371.0519.

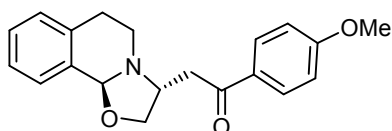

**3-[2-(4-methoxy-phenyl)-2-oxo-ethyl]-oxazolo[2,3-a]tetrahydroisoquinoline (4a).**

Recrystallized from ethyl acetate/hexane, yield: 90% (9:1 mixture of two diastereomers); physical state: white solid; mp 70-71 °C;  $^1\text{H}$  NMR (300 MHz,  $\text{CDCl}_3$ )  $\delta$  7.96 (d,  $J = 8.7$  Hz, 2H), 7.41-7.38 (m, 1H), 7.26-7.23 (m, 2H), 7.16-7.13 (m, 1H), 6.94 (d,  $J = 8.7$  Hz, 2H), 5.30 (s, 1H), 4.37 (t,  $J = 8.1$  Hz, 1H), 3.93-3.85 (m, 4H), 3.54-3.46 (m, 2H), 3.14 (dd,  $J = 17.4, 8.1$  Hz, 1H), 2.99-2.90 (m, 3H), 2.74-2.70 (m, 1H);  $^{13}\text{C}$  NMR (75 MHz,  $\text{CDCl}_3$ )  $\delta$  197.3, 163.8, 135.6, 132.0, 130.5, 130.2, 129.0, 128.4, 128.2, 126.4, 113.9, 89.2, 69.5, 62.5, 55.6, 47.1, 43.3, 29.9; HRMS: Calcd. for  $\text{C}_{20}\text{H}_{21}\text{NO}_3$ : 323.1521. Found: 323.1524.



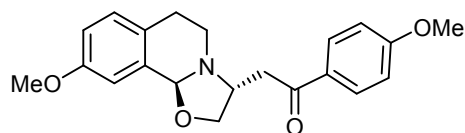

**3-[2-(4-methoxy-phenyl)-2-oxo-ethyl]-9-methoxy-oxazolo[2,3-a]tetrahydroisoquinoline (4b).**

Recrystallized from ethyl acetate/hexane, yield: 92% (17:1 mixture of two diastereomers); physical state: white solid; mp 81-82 °C; <sup>1</sup>H NMR (300 MHz, CDCl<sub>3</sub>) δ 7.96 (d, *J* = 9 Hz, 2H), 7.05 (d, *J* = 8.4 Hz, 1H), 6.94 (d, *J* = 9 Hz, 3H), 6.82 (dd, *J* = 8.4, 2.4 Hz, 1H), 5.27 (s, 1H), 4.36 (t, *J* = 7.8 Hz, 1H), 3.93-3.85 (m, 4H), 3.79 (s, 3H), 3.53-3.45 (m, 2H), 3.13 (dd, *J* = 17.4, 7.2 Hz, 1H), 2.98-2.87 (m, 3H), 2.70-2.63 (m, 1H); <sup>13</sup>C NMR (75 MHz, CDCl<sub>3</sub>) δ 197.2, 163.7, 158.1, 132.8, 130.4, 130.0, 129.1, 127.6, 115.5, 113.8, 112.7, 89.2, 69.4, 62.3, 55.5, 55.4, 47.3; HRMS: Calcd. for C<sub>21</sub>H<sub>23</sub>NO<sub>4</sub>: 353.1627. Found: 353.1636.

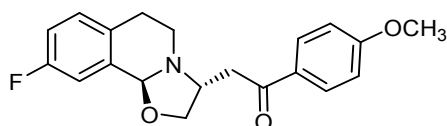

**9-fluoro-3-[2-(4-methoxy-phenyl)-2-oxo-ethyl]-oxazolo[2,3-a]tetrahydroisoquinoline (4c).**

Recrystallized from ethyl acetate/hexane, yield: 95% (18:1 mixture of two diastereomers); physical state: white solid; mp 68-69 °C; <sup>1</sup>H NMR (300 MHz, CDCl<sub>3</sub>) δ 7.96 (d, *J* = 8.7 Hz, 2H), 7.12-7.08 (m, 2H), 6.98-6.93 (m, 3H), 5.29 (s, 1H), 4.36 (t, *J* = 8.1 Hz, 1H), 3.93-3.85 (m, 4H), 3.52-3.44 (m, 2H), 3.12 (dd, *J* = 17.4, 8.1 Hz, 1H), 3.00-2.86 (m, 3H), 2.74-2.67 (m, 1H); <sup>13</sup>C NMR (75 MHz, CDCl<sub>3</sub>) δ 197.0, 163.7, 161.3 (d, *J* = 242.9 Hz), 133.8 (d, *J* = 7.4 Hz), 131.2, 130.4, 130.0, 129.6 (d, *J* = 7.6 Hz), 115.6 (t, *J* = 87.9 Hz), 115.3 (d, *J* = 92.7 Hz), 113.8, 88.6, 69.5, 62.2, 55.5, 47.0, 43.1, 29.1; HRMS: Calcd. for C<sub>20</sub>H<sub>20</sub>FNO<sub>3</sub>: 341.1427. Found: 341.1422.

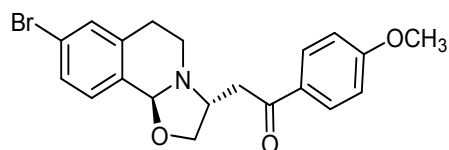

**8-bromo-3-[2-(4-methoxy-phenyl)-2-oxo-ethyl]-oxazolo[2,3-a]tetrahydroisoquinoline (4d).**

Recrystallized from ethyl acetate/hexane, yield: 88% (25:1 mixture of two diastereomers); physical state: white solid; mp 92-93 °C; <sup>1</sup>H NMR (300 MHz, CDCl<sub>3</sub>) δ 7.95 (d, *J* = 8.7 Hz, 2H), 7.38-7.25 (m, 4H), 6.94 (d, *J* = 8.7 Hz, 2H), 5.23 (s, 1H), 4.35 (t, *J* = 8.1 Hz, 1H), 3.93-3.85 (m, 4H), 3.52-3.44 (m, 2H), 3.11 (dd, *J* = 17.4, 7.8 Hz, 1H), 2.99-2.82 (m, 3H), 2.70-2.65 (m, 1H); <sup>13</sup>C NMR (75 MHz, CDCl<sub>3</sub>) δ 197.0, 163.7, 137.9, 131.0, 130.6, 130.4, 130.0, 129.6, 122.3, 113.9, 88.6, 69.5, 62.3, 55.6, 46.5, 43.2, 29.7; HRMS: Calcd. for C<sub>20</sub>H<sub>20</sub>BrNO<sub>3</sub>: 401.0627. Found: 401.0633.

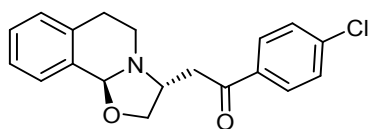

**3-[2-(4-Chloro-phenyl)-2-oxo-ethyl]-oxazolo[2,3-a]tetrahydroisoquinoline (4e).**

Recrystallized from ethyl acetate/hexane, yield: 90% (13:1 mixture of two diastereomers); physical state: white solid; mp 83-84 °C; <sup>1</sup>H NMR (300 MHz, CDCl<sub>3</sub>) δ 7.92 (d, *J* = 8.7 Hz, 2H), 7.45 (d, *J* = 8.4 Hz, 2H), 7.26-7.24 (m, 3H), 7.16-7.13 (m, 1H), 5.29 (s, 1H), 4.37 (t, *J* = 8.1 Hz, 1H), 3.93-3.84 (m, 1H), 3.55-3.46 (m, 2H), 3.13 (dd, *J* = 17.4, 7.5 Hz, 1H), 2.99-2.91 (m, 3H), 2.78-2.70 (m, 1H); <sup>13</sup>C NMR (75 MHz, CDCl<sub>3</sub>) δ 197.6, 139.9, 135.6, 135.4, 131.9, 130.2, 129.7, 129.1, 129.0, 128.5, 128.2, 126.5, 89.2, 69.4, 62.3, 47.1, 43.7, 29.9; HRMS: Calcd. for C<sub>19</sub>H<sub>18</sub>ClNO<sub>2</sub>: 327.1026. Found: 327.1035.

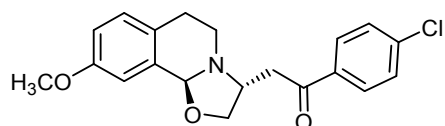

**3-[2-(4-Chloro-phenyl)-2-oxo-ethyl]-9-methoxy-oxazolo[2,3-a]tetrahydroisoquinoline (4f).**

Recrystallized from ethyl acetate/hexane, yield: 92% (13:1 mixture of two diastereomers); physical state: white solid; mp 113-114 °C; <sup>1</sup>H NMR (300 MHz, CDCl<sub>3</sub>) δ 7.91 (d, *J* = 8.4 Hz, 2H), 7.44 (d, *J* = 8.4 Hz, 2H), 7.05 (d, *J* = 8.4 Hz, 1H), 6.92 (d, *J* = 2.4 Hz, 1H), 6.82 (dd, *J* = 8.4, 2.7 Hz, 1H), 5.26 (s, 1H), 4.36 (t, *J* = 7.8 Hz, 1H), 3.92-3.83 (m, 1H), 3.79 (s, 3H), 3.54-3.45 (m, 2H), 3.12 (dd, *J* = 17.4, 7.8 Hz, 1H), 2.97-2.86 (m, 3H), 2.70-2.63 (m, 1H); <sup>13</sup>C NMR (75 MHz, CDCl<sub>3</sub>) δ 197.5, 158.2, 139.9, 135.3, 132.8, 129.6, 129.2, 129.1, 127.6, 115.6, 112.9, 89.3, 69.4, 62.3, 55.5, 47.4, 43.7, 29.0; HRMS: Calcd. for C<sub>20</sub>H<sub>20</sub>ClNO<sub>3</sub>: 357.1132. Found: 357.1125.

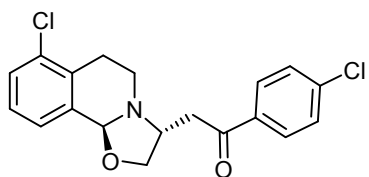

**3-[2-(4-Chloro-phenyl)-2-oxo-ethyl]-7-chloro-oxazolo[2,3-a]tetrahydroisoquinoline (4g).**

Recrystallized from ethyl acetate/hexane, yield: 90% (13:1 mixture of two diastereomers); physical state: white solid; mp 102 °C; <sup>1</sup>H NMR (300 MHz, CDCl<sub>3</sub>) δ 7.91 (d, *J* = 8.4 Hz, 2H), 7.44 (d, *J* = 8.4 Hz, 2H), 7.36-7.30 (m, 2H), 7.22-7.17 (m, 1H), 5.25 (s, 1H), 4.37 (t, *J* = 7.8 Hz, 1H), 3.89 (m, 1H), 3.54-3.45 (m, 2H), 3.12 (dd, *J* = 17.4, 7.5 Hz, 1H), 3.05-2.75 (m, 4H); <sup>13</sup>C NMR (75 MHz, CDCl<sub>3</sub>) δ 197.3, 139.9, 135.2, 133.8, 133.6, 129.5, 129.1, 127.5, 127.3, 88.7, 69.3, 62.0, 46.4, 43.5, 27.7; HRMS: Calcd. for C<sub>19</sub>H<sub>17</sub>Cl<sub>2</sub>NO<sub>3</sub>: 361.0636. Found: 361.0645.

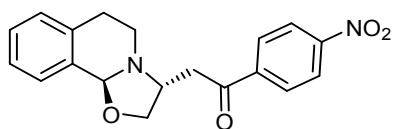

**3-[2-(4-nitro-phenyl)-2-oxo-ethyl]-oxazolo[2,3-a]tetrahydroisoquinoline (4h).**

Recrystallized from ethyl acetate/hexane, yield: 88% (25:1 mixture of two diastereomers); physical state: yellow solid; mp 94-95 °C; <sup>1</sup>H NMR (300 MHz, CDCl<sub>3</sub>) δ 8.33 (d, *J* = 8.7 Hz, 2H), 8.14 (d, *J* = 9.0, Hz, 2H), 7.41-7.38 (m, 1H), 7.27-7.24 (m, 2H), 7.16-7.13 (m, 1H), 5.29 (s, 1H), 4.38 (t, *J* = 8.1 Hz, 1H), 3.93-3.88 (m, 1H), 3.59 (dd, *J* = 17.7, 6.9 Hz, 1H), 3.52-3.48 (m, 1H), 3.17 (dd, *J* = 17.7, 6.9 Hz, 1H), 2.99-2.90 (m, 3H), 2.77-2.70 (m, 1H); <sup>13</sup>C NMR (75 MHz, CDCl<sub>3</sub>) δ 197.2, 150.4, 141.3, 135.4, 131.6, 129.2, 128.9, 128.5, 128.1, 126.4, 124.0, 89.1, 69.1, 62.1, 47.0, 44.1, 29.8; ESI-MS: Calcd. for C<sub>19</sub>H<sub>19</sub>N<sub>2</sub>O<sub>4</sub>: 339.1339. Found: 339.1342.

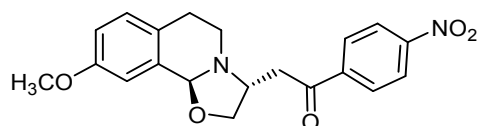

**9-methoxy-3-[2-(4-nitro-phenyl)-2-oxo-ethyl]-oxazolo[2,3-a]tetrahydroisoquinoline (4i).**

Recrystallized from ethyl acetate/hexane, yield: 92% (25:1 mixture of two diastereomers); physical state: yellow solid; mp 118-119 °C; <sup>1</sup>H NMR (300 MHz, CDCl<sub>3</sub>) δ 8.32 (d, *J* = 8.7 Hz, 2H), 8.13 (d, *J* = 8.7, Hz, 2H), 7.06 (d, *J* = 8.4, Hz, 1H), 6.92 (d, *J* = 2.4, Hz, 1H), 6.83 (dd, *J* = 8.4, 2.7, Hz, 1H), 5.26 (s, 1H), 4.38 (t, *J* = 7.8 Hz, 1H), 3.94-3.86 (m, 1H), 3.80 (s, 3H), 3.62-3.47 (m, 2H), 3.70 (dd, *J* = 17.4, 6.9 Hz, 1H), 2.98-2.86 (m, 1H), 2.98-2.86 (m, 3H), 2.71-2.63 (m, 1H); <sup>13</sup>C NMR (50 MHz, CDCl<sub>3</sub>) δ 197.2, 158.1, 150.4, 141.3, 132.5, 129.2, 127.5, 124.0, 115.5, 112.8, 89.2, 69.1, 62.1, 55.4, 47.4, 44.1, 29.0; ESI-MS: Calcd. for C<sub>20</sub>H<sub>21</sub>N<sub>2</sub>O<sub>5</sub>: 369.1445. Found: 369.1433.

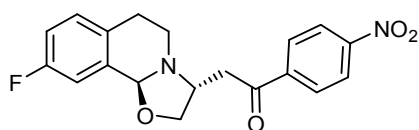

**9-fluoro-3-[2-(4-nitro-phenyl)-2-oxo-ethyl]-oxazolo[2,3-a]tetrahydroisoquinoline (4j).**

Recrystallized from ethyl acetate/hexane, yield: 90% (22:1 mixture of two diastereomers); physical state: yellow solid; mp 88-89 °C; <sup>1</sup>H NMR (300 MHz, CDCl<sub>3</sub>) δ 8.32 (d, *J* = 8.7 Hz, 2H), 8.13 (d, *J* = 8.7, Hz, 2H), 7.11-7.07 (m, 2H), 6.92 (td, *J* = 8.4, 2.7, Hz, 1H), 5.24 (s, 1H), 4.37 (t, *J* = 7.8 Hz, 1H), 3.95-3.87 (m, 1H), 3.61-3.47 (m, 2H), 3.17 (dd, *J* = 17.7, 6.9 Hz, 1H), 3.00-2.87 (m, 3H), 2.75-2.86 (m, 1H); <sup>13</sup>C NMR (50 MHz, CDCl<sub>3</sub>) δ 197.1, 161.34 (d, *J* = 243 Hz), 150.4, 141.2, 133.4 (d, *J* = 7.2 Hz), 131.1, 129.7 (d, *J* = 7.8 Hz), 129.1, 123.9, 115.7 (d, *J* = 21.8 Hz), 115.3 (d, *J* = 21.8 Hz), 88.2, 69.1, 61.9, 47.0, 44.0, 29.1; ESI-MS: Calcd. for C<sub>19</sub>H<sub>18</sub>FN<sub>2</sub>O<sub>4</sub>: 357.1245. Found: 357.1234.

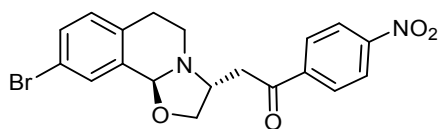

**9-bromo-3-[2-(4-nitrophenyl)-2-oxo-ethyl]-oxazolo[2,3-a]tetrahydroisoquinoline (4k).**

Recrystallized from ethyl acetate/hexane, yield: 89% (25:1 mixture of two diastereomers); physical state: yellow solid; mp 120-121 °C; <sup>1</sup>H NMR (300 MHz, CDCl<sub>3</sub>) δ 8.33 (d, *J* = 8.7 Hz, 2H), 8.13 (d, *J* = 8.7, Hz, 2H), 7.54 (s, 1H), 7.37 (d, *J* = 8.1, Hz, 1H), 7.03 (d, *J* = 8.1, Hz, 1H), 5.22 (s, 1H), 4.37 (t, *J* = 7.8 Hz, 1H), 3.92-3.86 (m, 1H), 3.61-3.47 (m, 2H), 3.16 (dd, *J* = 17.7, 6.9 Hz, 1H), 3.01-2.81 (m, 3H), 2.73-2.66 (m, 1H); <sup>13</sup>C NMR (75 MHz, CDCl<sub>3</sub>) δ 197.0, 150.5, 159.6, 141.2, 134.5, 133.8, 131.7, 131.5, 129.8, 129.2, 124.0, 119.9, 88.4, 69.2, 61.9, 46.8, 44.0, 29.3; ESI-MS: Calcd. for C<sub>19</sub>H<sub>18</sub>BrN<sub>2</sub>O<sub>4</sub>: 417.0444. Found: 417.0462.

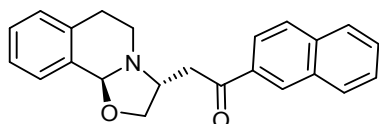

**3-[2-(naphthalene-2-yl)-2-oxo-ethyl]-oxazolo[2,3-a]tetrahydroisoquinoline (4l).**

Recrystallized from ethyl acetate/hexane, yield: 93% (15:1 mixture of two diastereomers); physical state: white solid; mp 100-101 °C; <sup>1</sup>H NMR (300 MHz, CDCl<sub>3</sub>) δ 8.51 (s, 1H), 8.04 (d, *J* = 8.7 Hz, 1H), 7.97-7.87 (m, 3H), 7.63-7.53 (m, 2H), 7.42-7.40 (m, 1H), 7.26-7.24 (m, 2H), 7.16-7.13 (m, 1H), 5.35 (s, 1H), 4.42 (t, *J* = 8.1 Hz, 1H), 4.00-3.92 (m, 1H), 3.70 (dd, *J* = 17.7, 6.3 Hz, 1H), 3.54 (dd, *J* = 8.4, 4.8 Hz, 1H), 3.33 (dd, *J* = 17.4, 7.8 Hz, 1H), 3.03-2.92 (m, 3H), 2.78-2.71 (m, 1H); <sup>13</sup>C NMR (75 MHz, CDCl<sub>3</sub>) δ 198.6, 135.7, 135.5, 134.2, 132.5, 131.9, 130.0, 129.7, 128.9, 128.7, 128.6, 128.4, 128.1, 127.9, 126.9, 126.4, 123.7, 89.1, 69.5, 62.4, 47.0, 43.7, 29.9; HRMS: Calcd. for C<sub>23</sub>H<sub>21</sub>NO<sub>2</sub>: 343.1572. Found: 343.1570.

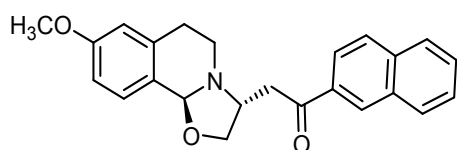

**8-methoxy-3-[2-(naphthalene-2-yl)-2-oxo-ethyl]-oxazolo[2,3-a]tetrahydroisoquinoline (4m).**

Recrystallized from ethyl acetate/hexane, yield: 90% (21:1 mixture of two diastereomers); physical state: white solid; mp 100-101 °C; <sup>1</sup>H NMR (300 MHz, CDCl<sub>3</sub>) δ 8.53 (s, 1H), 8.06 (d, *J* = 8.7 Hz, 1H), 7.99-7.89 (m, 3H), 7.66-7.55 (m, 2H), 7.08 (d, *J* = 8.4 Hz, 1H), 6.96 (d, *J* = 2.4 Hz, 1H), 6.85 (d, *J* = 8.4 Hz, 1H), 5.35 (s, 1H), 4.43 (t, *J* = 7.8 Hz, 1H), 3.98 (m, 1H), 3.82 (s, 3H), 3.71 (dd, *J* = 17.4, 6 Hz, 1H), 3.56 (dd, *J* = 8.4, 4.8 Hz, 1H), 3.35 (dd, *J* = 17.4, 7.8 Hz, 1H), 3.03-2.89 (m, 3H), 2.74-2.67 (m, 1H); <sup>13</sup>C NMR (75 MHz, CDCl<sub>3</sub>) δ; HRMS: Calcd. for C<sub>24</sub>H<sub>23</sub>NO<sub>3</sub>: 373.1678. Found: 373.1669.

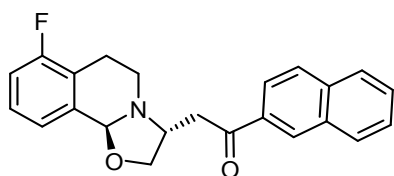

**7-fluoro-3-[2-(naphthalene-2-yl)-2-oxo-ethyl]-oxazolo[2,3-a]tetrahydroisoquinoline (4n).**

Recrystallized from ethyl acetate/hexane, yield: 92% (14:1 mixture of two diastereomers); physical state: white solid; mp 118 °C; <sup>1</sup>H NMR (300 MHz, CDCl<sub>3</sub>) δ 8.50 (s, 1H), 8.04 (d, *J* = 8.7 Hz, 1H), 7.97-7.89 (m, 3H), 7.64-7.53 (m, 2H), 7.22-7.21 (m, 2H), 7.02-6.96 (m, 1H), 5.33 (s, 1H), 4.42 (t, *J* = 8.1 Hz, 1H), 4.02-3.93 (m, 1H), 3.69 (dd, *J* = 17.7, 6.3 Hz, 1H), 3.55 (dd, *J* = 8.4, 4.8 Hz, 1H), 3.32 (dd, *J* = 17.7, 7.8 Hz, 1H), 3.07-3.03 (m, 1H), 2.97-2.69 (m, 3H); <sup>13</sup>C NMR (75 MHz, CDCl<sub>3</sub>) δ 198.4, 160.4 (d, *J* = 243.7 Hz), 135.8, 134.2, 132.5, 130.0, 129.7, 128.7 (d, *J* = 4.5 Hz), 127.9, 127.5 (d, *J* = 7.6 Hz), 127.0, 124.5, 123.7, 123.4, 123.2, 114.7 (d, *J* = 21.2 Hz), 88.4, 69.5, 62.2, 46.1, 43.7, 22.9; HRMS: Calcd. for C<sub>24</sub>H<sub>25</sub>FNO<sub>3</sub>: 361.1478. Found: 361.1485.

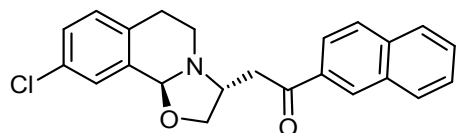

**9-chloro-3-[2-(naphthalene-2-yl)-2-oxo-ethyl]-oxazolo[2,3-a]tetrahydroisoquinoline (4o).**

Recrystallized from ethyl acetate/hexane, yield: 93% (16:1 mixture of two diastereomers); physical state: white solid; mp 95-96 °C; <sup>1</sup>H NMR (300 MHz, CDCl<sub>3</sub>) δ 8.50 (s, 1H), 8.04 (d, *J* = 8.4 Hz, 1H), 7.97-7.86 (m, 3H), 7.63-7.53 (m, 2H), 7.40 (s, 1H), 7.25-7.20 (m, 1H), 7.07 (d, *J* = 7.8 Hz, 1H), 5.28 (s, 1H), 4.40 (t, *J* = 7.8 Hz, 1H), 3.97-3.64 (m, 1H), 3.67 (dd, *J* = 17.7, 6.3 Hz, 1H), 3.56-3.51 (m, 1H), 3.29 (dd, *J* = 17.4, 7.5 Hz, 1H), 3.02-2.89 (m, 3H), 2.72-2.67 (m, 1H); <sup>13</sup>C NMR (75 MHz, CDCl<sub>3</sub>) δ 198.4, 135.7, 134.1, 134.0, 133.7, 132.5, 131.9, 129.9, 129.5, 128.8, 128.7, 128.6, 128.5, 127.8, 126.9, 123.6, 88.5, 69.4, 62.2, 46.8, 43.6, 29.3; HRMS: Calcd. for C<sub>23</sub>H<sub>20</sub>ClNO<sub>2</sub>: 377.1183. Found: 377.1184.

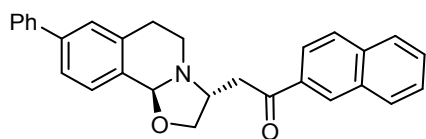

**3-[2-(naphthalene-2-yl)-2-oxo-ethyl]-8-phenyl-oxazolo[2,3-a]tetrahydroisoquinoline (4p).**

Recrystallized from ethyl acetate/hexane, yield: 92% (17:1 mixture of two diastereomers); physical state: white solid; mp 95-96 °C; <sup>1</sup>H NMR (300 MHz, CDCl<sub>3</sub>) δ 8.52 (s, 1H), 8.06 (dd, *J* = 8.7, 1.5 Hz, 1H), 7.98-7.87 (m, 3H), 7.64-7.54 (m, 4H), 7.48-7.34 (m, 6H), 5.40 (s, 1H), 4.43 (t, *J* = 7.5 Hz, 1H), 4.01-3.96 (m, 1H), 3.71 (dd, *J* = 17.4, 6.3 Hz, 1H), 3.57 (dd, *J* = 8.4, 4.8 Hz, 1H), 3.34 (dd, *J* = 17.4, 7.8 Hz, 1H), 3.06-2.96 (m, 3H), 2.82-2.78 (m, 1H); <sup>13</sup>C NMR (75 MHz, CDCl<sub>3</sub>) δ 198.6, 141.3, 140.9, 136.0, 135.8, 134.3, 132.6, 131.0, 130.0, 129.7, 129.3, 128.8, 128.7, 129.7, 127.5, 127.2, 127.0, 126.8, 125.4, 123.8, 89.1, 69.5, 62.4, 47.1, 43.8, 30.1.

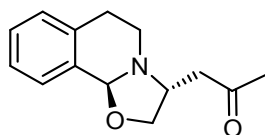

**3-(2-methyl-2-oxo-ethyl)-oxazolo[2,3-a]tetrahydroisoquinoline (4q).**

Physical state: yellow oil, yield: 92% (12:1 mixture of two diastereomers);  $^1\text{H}$  NMR (300 MHz,  $\text{CDCl}_3$ )  $\delta$  7.38-7.35 (m, 1H), 7.24-7.21 (m, 2H), 7.14 (m, 1H), 5.20 (s, 1H), 4.23 (t,  $J = 8.1$  Hz, 1H), 3.73-3.64 (m, 1H), 3.36 (dd,  $J = 8.4, 4.8$  Hz, 1H), 2.97-2.86 (m, 4H), 2.73-2.55 (m, 2H);  $^{13}\text{C}$  NMR (75 MHz,  $\text{CDCl}_3$ )  $\delta$  207.3, 135.3, 131.6, 128.8, 128.3, 128.0, 126.2, 88.9, 68.7, 61.8, 48.1, 46.8, 30.7, 29.6; HRMS: Calcd. for  $\text{C}_{14}\text{H}_{17}\text{NO}_2$ : 231.1259. Found: 231.1257.

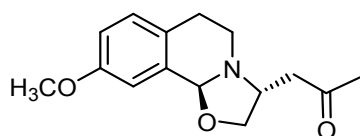

**9-methoxy-3-(2-methyl-2-oxo-ethyl)-oxazolo[2,3-a]tetrahydroisoquinoline (4r).**

Physical state: yellow oil, yield: 95% (7:1 mixture of two diastereomers);  $^1\text{H}$  NMR (300 MHz,  $\text{CDCl}_3$ )  $\delta$  7.05 (d,  $J = 8.7$  Hz, 1H), 6.90 (d,  $J = 2.7$  Hz, 1H), 6.82 (dd,  $J = 8.7, 2.7$  Hz, 1H), 5.19 (s, 1H), 4.24 (t,  $J = 7.9$  Hz, 1H), 3.79 (s, 3H), 3.74-3.65 (m, 1), 3.37 (dd,  $J = 8.4, 4.8$  Hz, 1H), 2.98-2.82 (m, 4H), 2.66-2.57 (m, 2H);  $^{13}\text{C}$  NMR (75 MHz,  $\text{CDCl}_3$ )  $\delta$  207.1, 157.9, 132.5, 128.9, 127.3, 115.2, 112.6, 88.9, 68.6, 61.7, 55.2, 47.9, 47.0, 30.6, 28.7; HRMS: Calcd. for  $\text{C}_{15}\text{H}_{19}\text{NO}_3$ : 261.1365. Found: 261.1358.

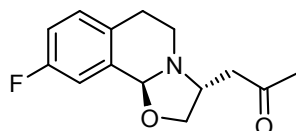

**9-fluoro-3-(2-methyl-2-oxo-ethyl)-oxazolo[2,3-a]tetrahydroisoquinoline (4s).**

Physical state: yellow oil, yield: 90% (25:1 mixture of two diastereomers);  $^1\text{H}$  NMR (300 MHz,  $\text{CDCl}_3$ )  $\delta$  7.12-7.06 (m, 2H), 6.99-6.92 (m, 1H), 5.16 (s, 1H), 4.24 (t,  $J = 7.8$  Hz, 1H), 3.73-3.69 (m, 1H), 3.37 (dd,  $J = 8.4, 4.8$  Hz, 1H), 2.97-2.81 (m, 4H), 2.72-2.57 (m, 2H);  $^{13}\text{C}$  NMR (75 MHz,  $\text{CDCl}_3$ )  $\delta$  207.0, 161.0 (d,  $J = 242.6$  Hz), 133.5 (d,  $J = 7.2$  Hz), 131.0, 129.4 (d,  $J = 7.5$  Hz), 115.3 (d,  $J = 88.5$  Hz), 115.0 (d,  $J = 89.7$  Hz), 88.3, 68.6, 61.5, 47.8, 46.7, 30.5, 28.8; HRMS: Calcd. for  $\text{C}_{14}\text{H}_{16}\text{FNO}_2$ : 249.1165. Found: 249.1162.

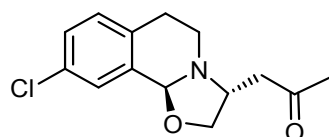

**9-chloro-3-(2-methyl-2-oxo-ethyl)-oxazolo[2,3-a]tetrahydroisoquinoline (4t).**

Physical state: yellow oil, yield: 91% (14:1 mixture of two diastereomers);  $^1\text{H}$  NMR (300 MHz,  $\text{CDCl}_3$ )  $\delta$  7.12-7.06 (m, 2H), 6.98-6.92 (m, 1H), 5.16 (s, 1H), 4.23 (t,  $J = 7.8$  Hz, 1H), 3.75-3.66 (m, 1H), 3.37 (dd,  $J = 8.4, 4.8$  Hz, 1H), 2.97-2.80 (m, 4H), 2.71-2.62 (m, 2H);  $^{13}\text{C}$  NMR (75 MHz,  $\text{CDCl}_3$ )  $\delta$  207.1, 133.9, 133.5, 131.8, 129.4, 128.7, 128.4, 88.3, 68.8, 61.7, 48.0, 46.6, 30.7, 29.2; HRMS: Calcd. for  $\text{C}_{14}\text{H}_{16}\text{ClNO}_2$ : 265.0870. Found: 265.0865.

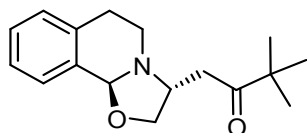

**3-[2-(*t*-butyl)-2-oxo-ethyl]-2-oxo-ethyl-oxazolo[2,3-*a*]tetrahydroisoquinoline (4u).**

Physical state: yellow oil, yield: 96% (25:1 mixture of two diastereomers);  $^1\text{H}$  NMR (300 MHz,  $\text{CDCl}_3$ )  $\delta$  7.39-7.36 (m, 1H), 7.27-7.22 (m, 2H), 7.14-7.11 (m, 1H), 5.22 (s, 1H), 4.27 (t,  $J = 7.8$  Hz, 1H), 3.76-3.68 (m, 1H), 3.33 (dd,  $J = 8.1, 4.8$  Hz, 1H), 3.05 (dd,  $J = 7.7, 6.3$  Hz, 1H), 2.97-2.84 (m, 3H), 2.72-2.63 (m, 2H);  $^{13}\text{C}$  NMR (75 MHz,  $\text{CDCl}_3$ )  $\delta$  214.7, 135.4, 131.8, 128.8, 128.3, 128.0, 126.3, 88.9, 69.2, 62.2, 46.9, 44.1, 41.5, 29.8, 26.3; HRMS: Calcd. for  $\text{C}_{17}\text{H}_{23}\text{NO}_2$ : 273.1729. Found: 273.1722.

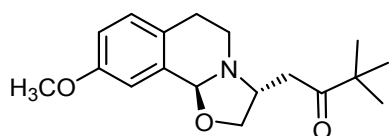

**3-[2-(*t*-butyl)-2-oxo-ethyl]-9-methoxy-2-oxo-ethyl-oxazolo[2,3-*a*]tetrahydroisoquinoline (4v).**

Physical state: yellow oil, yield: 96% (25:1 mixture of two diastereomers);  $^1\text{H}$  NMR (300 MHz,  $\text{CDCl}_3$ )  $\delta$  7.03 (d,  $J = 8.4$  Hz, 1H), 6.9 (d,  $J = 6.9$  Hz, 1H), 6.81 (dd,  $J = 8.1, 2.4$  Hz, 1H), 5.19 (s, 1H), 4.26 (t,  $J = 8.1$  Hz, 1H), 3.78-3.67 (m, 4H), 3.33 (dd,  $J = 8.4, 4.8$  Hz, 1H), 3.04 (dd,  $J = 17.4, 6.0$  Hz, 1H), 2.90-2.80 (m, 3H), 2.72-2.61 (m, 2H);  $^{13}\text{C}$  NMR (75 MHz,  $\text{CDCl}_3$ )  $\delta$  214.7, 158.1, 132.8, 129.1, 127.6, 115.5, 112.7, 89.1, 69.2, 62.2, 55.3, 47.3, 44.1, 41.6, 29.0; HRMS: Calcd. for  $\text{C}_{18}\text{H}_{25}\text{NO}_3$ : 303.1834. Found: 303.1831.

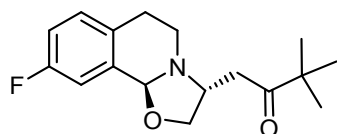

**9-fluoro-3-[2-(*t*-butyl)-2-oxo-ethyl]-2-oxo-ethyl-oxazolo[2,3-*a*]tetrahydroisoquinoline (4w).**

Physical state: yellow oil, yield: 91% (25:1 mixture of two diastereomers);  $^1\text{H}$  NMR (300 MHz,  $\text{CDCl}_3$ )  $\delta$  7.12-7.06 (m, 2H), 6.94 (td,  $J = 8.4, 2.4$  Hz, 1H), 5.17 (s, 1H), 4.26 (t,  $J = 8.1$  Hz, 1H), 3.77-3.68 (m, 1H), 3.33 (dd,  $J = 8.4, 4.8$  Hz, 1H), 3.03 (dd,  $J = 17.4, 6.3$  Hz, 1H), 2.92-2.80 (m, 3H), 2.71-2.63 (m, 2H);  $^{13}\text{C}$  NMR (75 MHz,  $\text{CDCl}_3$ )  $\delta$  214.7, 161.3 (d,  $J = 242.5$  Hz), 133.9 (d,  $J = 7.2$  Hz), 131.3, 129.7 (d,  $J = 7.5$  Hz), 115.6 (d,  $J = 87.3$  Hz), 115.3 (d,  $J = 88.5$  Hz), 88.7, 69.3, 62.2, 47.0, 44.2, 41.6, 29.2, 26.4; HRMS: Calcd. for  $\text{C}_{17}\text{H}_{22}\text{FNO}_2$ : 291.1635. Found: 291.1631.

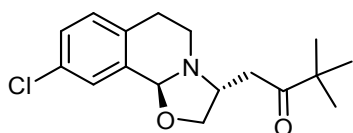

**9-chloro-3-[2-(*t*-butyl)-2-oxo-ethyl]-2-oxo-ethyl-oxazolo[2,3-a]tetrahydroisoquinoline (4x).**

Physical state: yellow oil, yield: 92% (25:1 mixture of two diastereomers);  $^1\text{H}$  NMR (300 MHz,  $\text{CDCl}_3$ )  $\delta$  7.37 (s, 1H), 7.20 (d,  $J = 8.1$  Hz, 1H), 7.06 (d,  $J = 8.1$  Hz, 1H), 5.16 (s, 1H), 4.26 (t,  $J = 7.8$  Hz, 1H), 3.76-3.67 (m, 1H), 3.33 (dd,  $J = 8.4, 4.8$  Hz, 1H), 3.03 (dd,  $J = 17.7, 6.3$  Hz, 1H), 2.93-2.80 (m, 3H), 2.70-2.62 (m, 2H);  $^{13}\text{C}$  NMR (75 MHz,  $\text{CDCl}_3$ )  $\delta$  214.7, 134.1, 133.8, 131.9, 129.5, 128.8, 128.5, 88.5, 69.3, 62.2, 46.8, 44.2, 41.6, 29.4, 26.4; HRMS: Calcd. for  $\text{C}_{17}\text{H}_{22}\text{ClNO}_2$ : 307.1339. Found: 307.1337.

**Reference**

- [1] T. Inokuma, K. Takasu, T. Sakaeda, and Y. Takemoto, *Org. Lett.*, **2006**, *11*, 2425-2428.  
 [2] B. W. Greatrex, M. C. Kimber, D. K. Taylor, E. R. T. Tiekink., *J. Org. Chem.* **2003**, *68*, 4239-4246.

**NMR Spectra of Product**

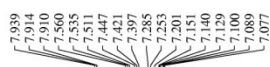

— 4.441

— 3.638

— 0.000

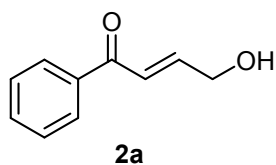



**Figure S1:**  $^1\text{H}$  NMR spectra of compound **2a**.

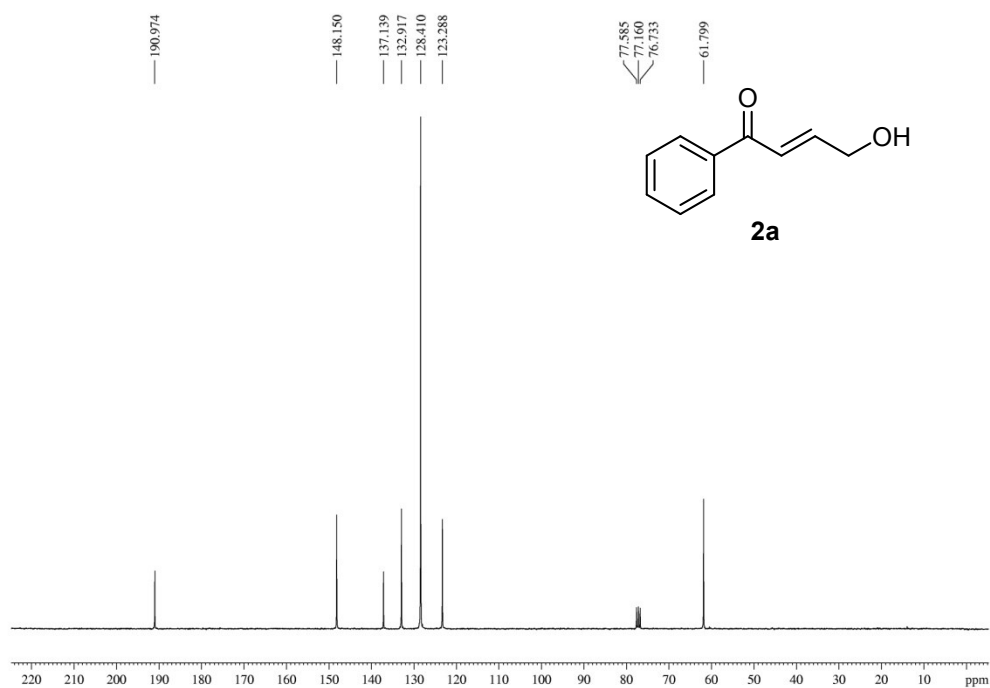

**Figure S2:**  $^{13}\text{C}$  NMR spectra of compound **2a**.

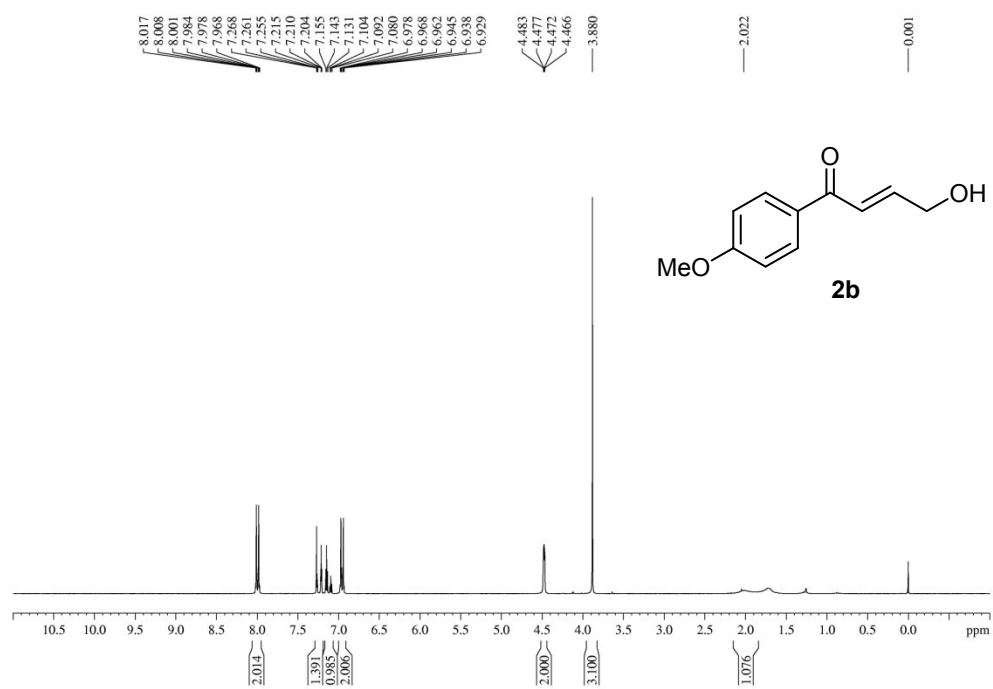

Figure S3: <sup>1</sup>H NMR spectra of compound **2b**.

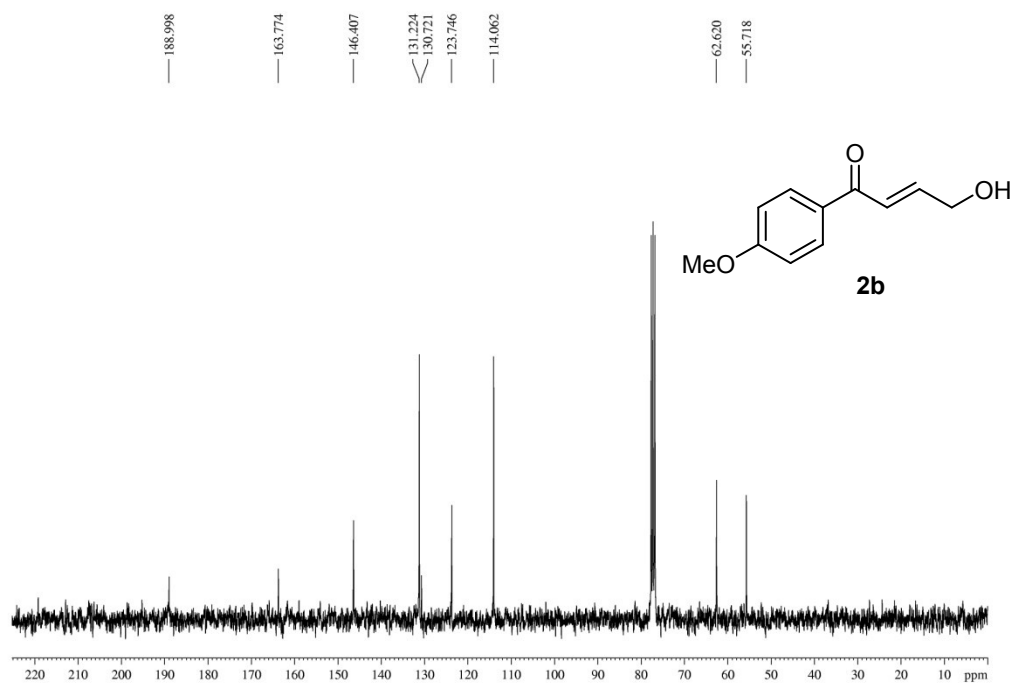

Figure S4: <sup>13</sup>C NMR spectra of compound **2b**.

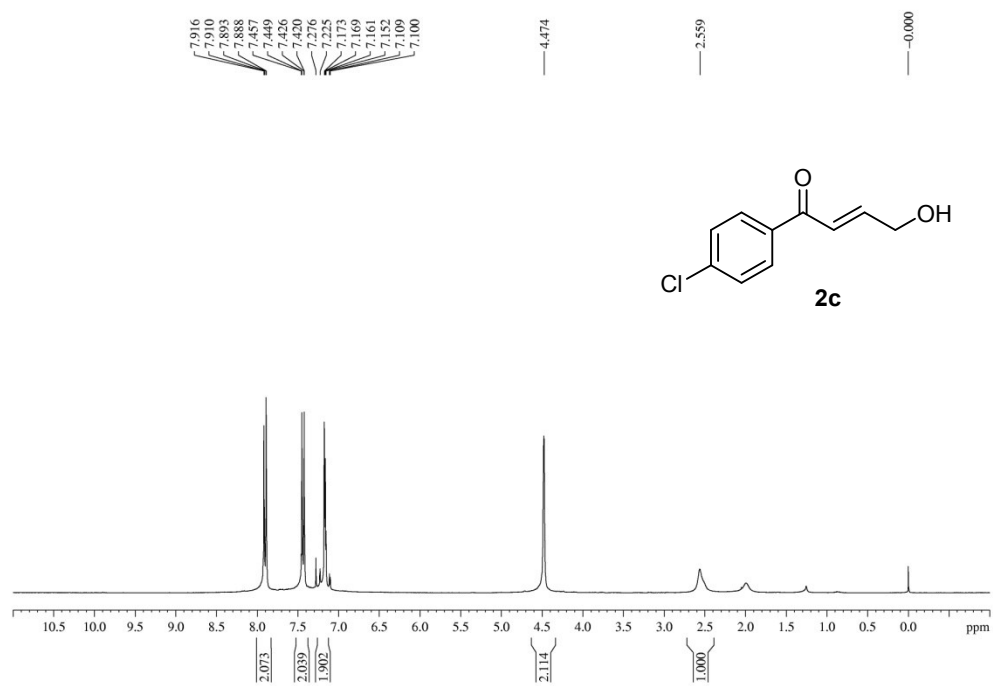

Figure S5: <sup>1</sup>H NMR spectra of compound **2c**.

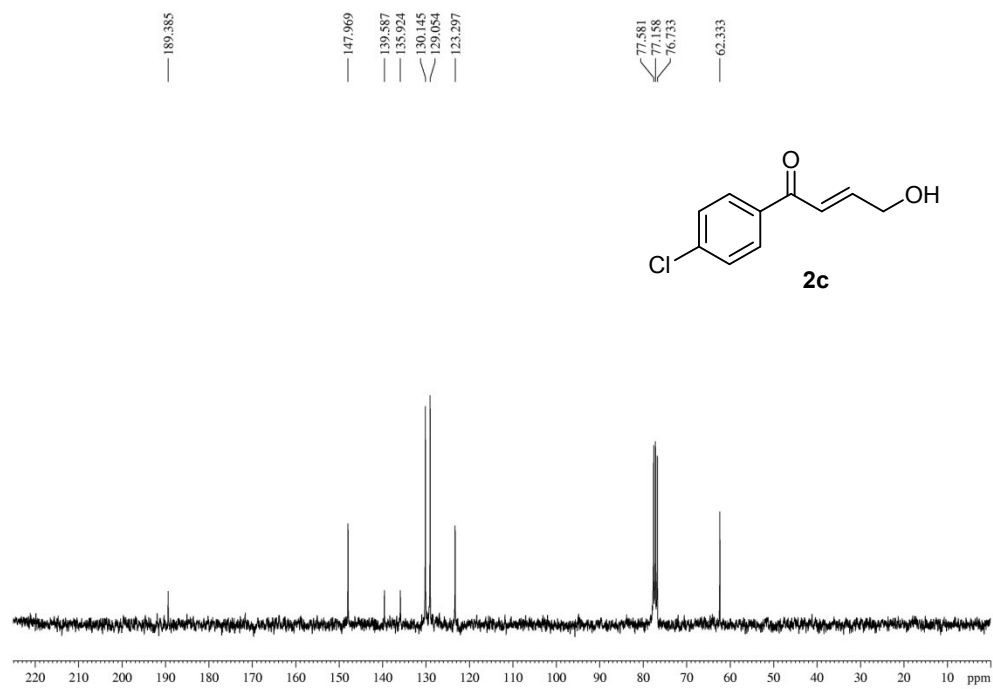

Figure S6: <sup>13</sup>C NMR spectra of compound **2c**.

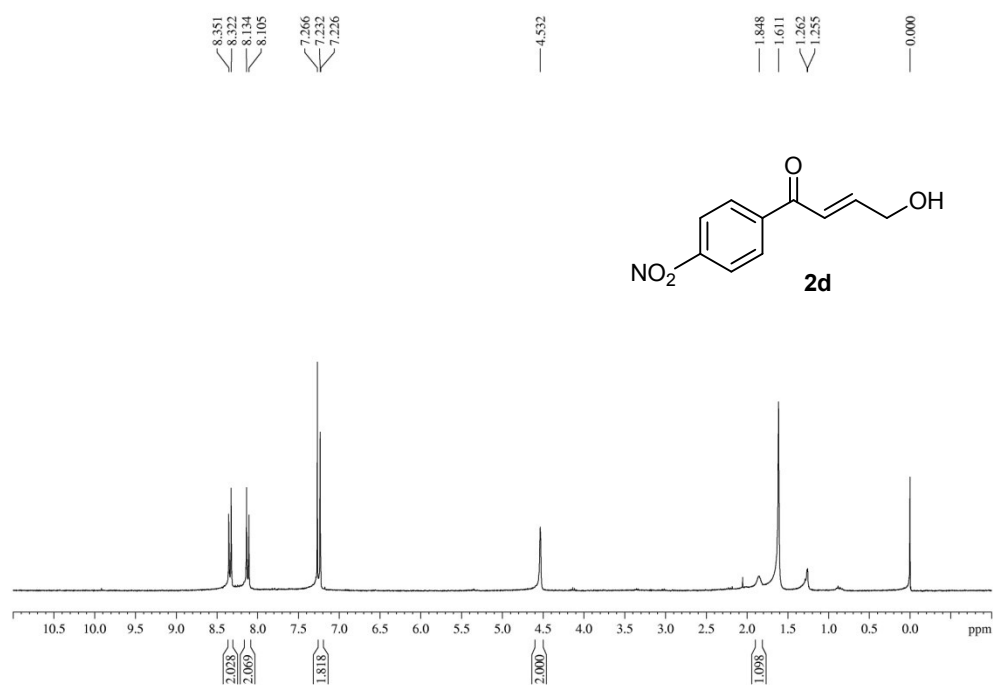

Figure S7: <sup>1</sup>H NMR spectra of compound **2d**.

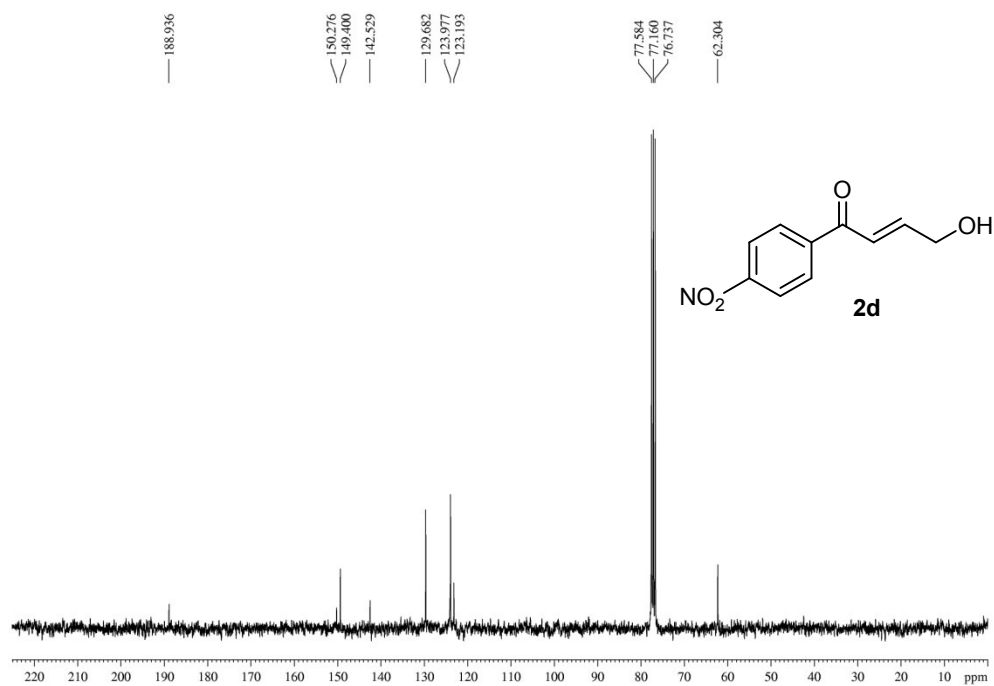

Figure S8: <sup>13</sup>C NMR spectra of compound **2d**.

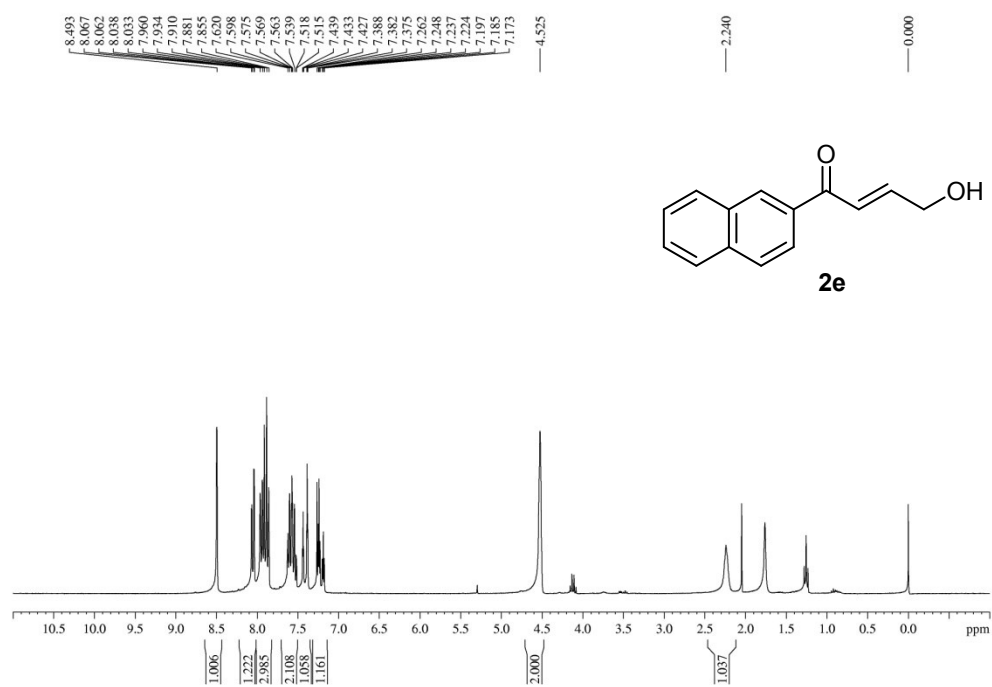

Figure S9: <sup>1</sup>H NMR spectra of compound **2e**.

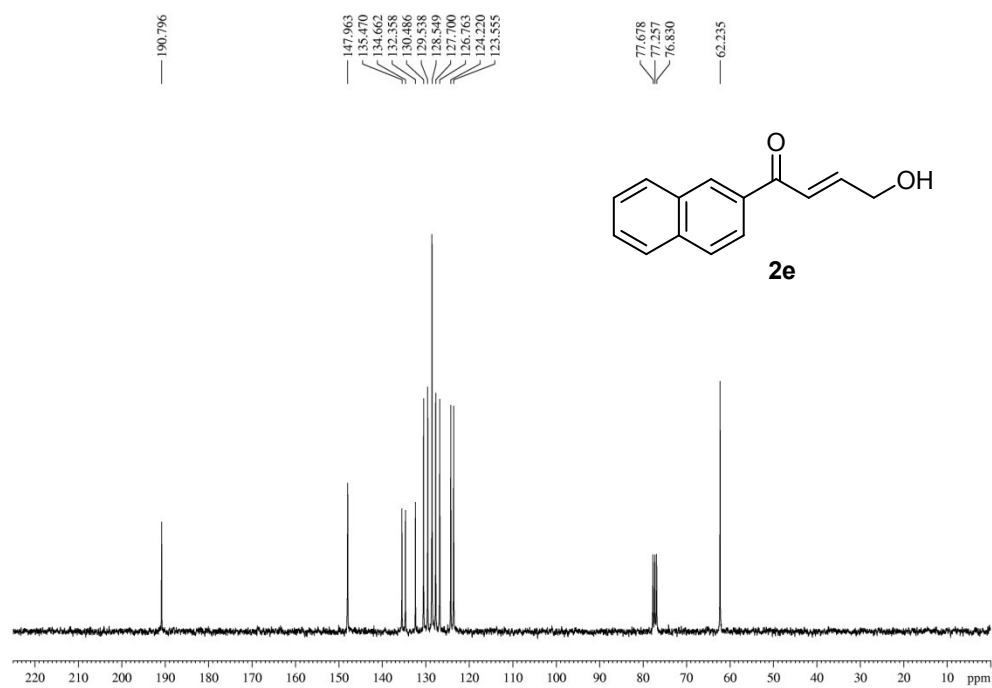

Figure S10: <sup>13</sup>C NMR spectra of compound **2e**.

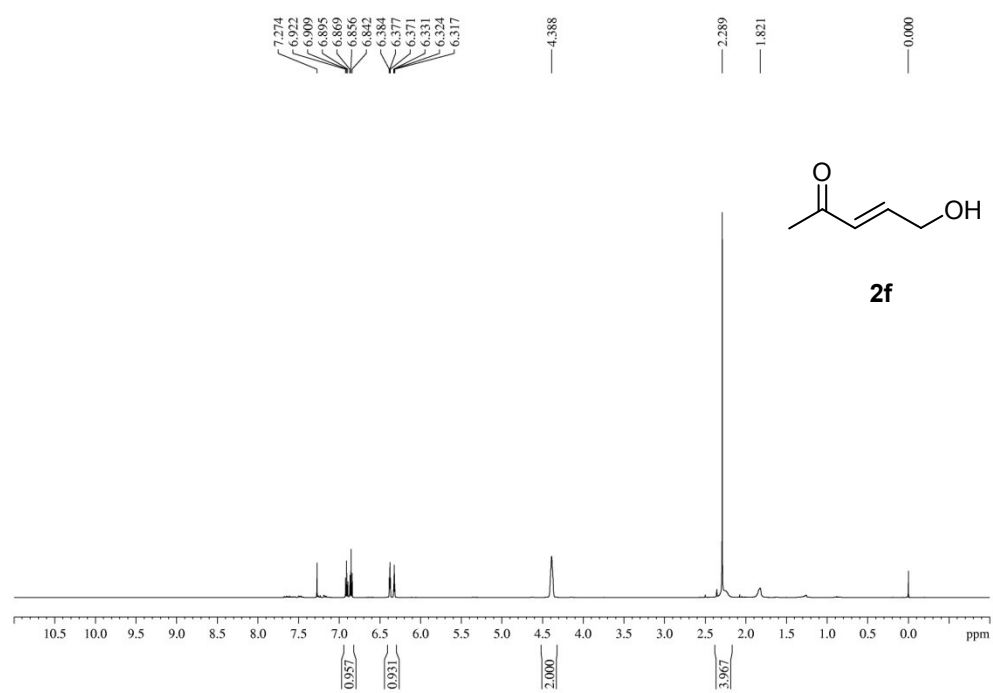

Figure S11: <sup>1</sup>H NMR spectra of compound **2f**.

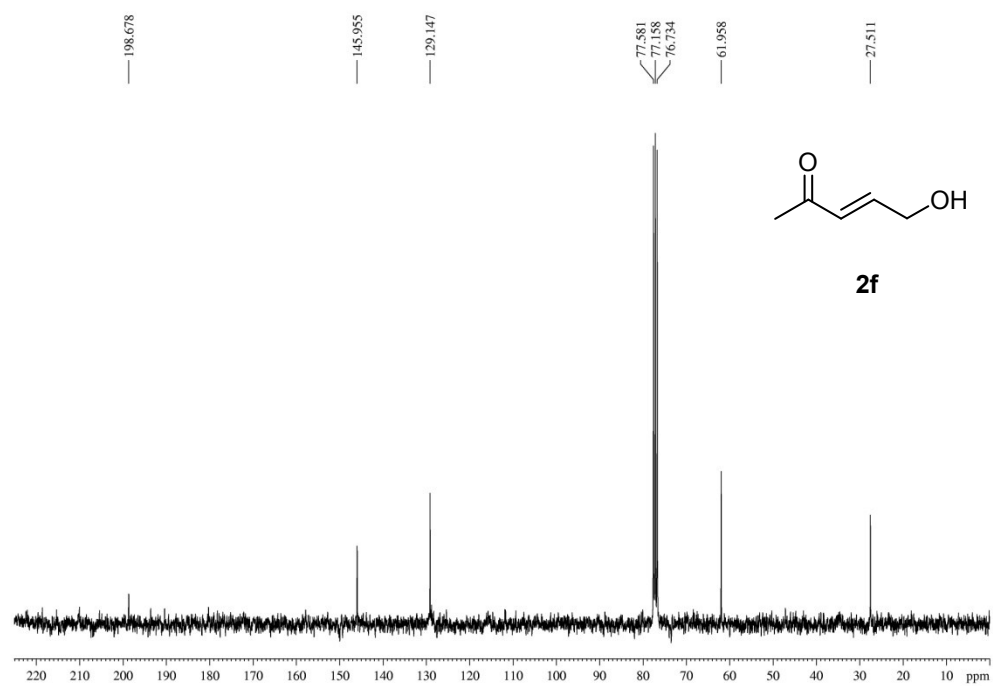

Figure S12: <sup>13</sup>C NMR spectra of compound **2f**.

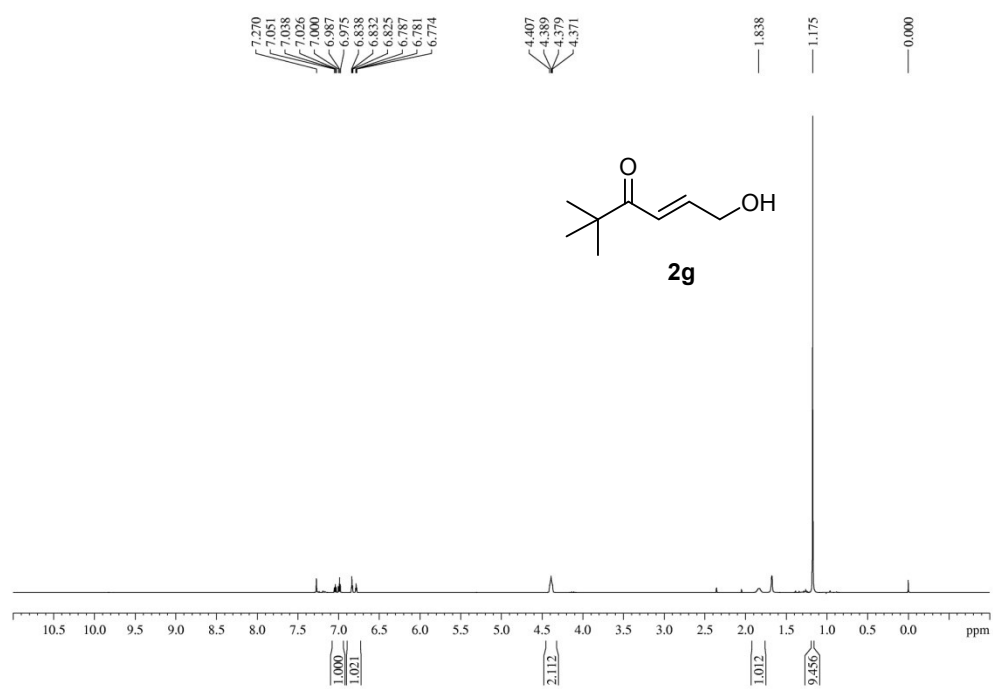

Figure S13: <sup>1</sup>H NMR spectra of compound **2g**.

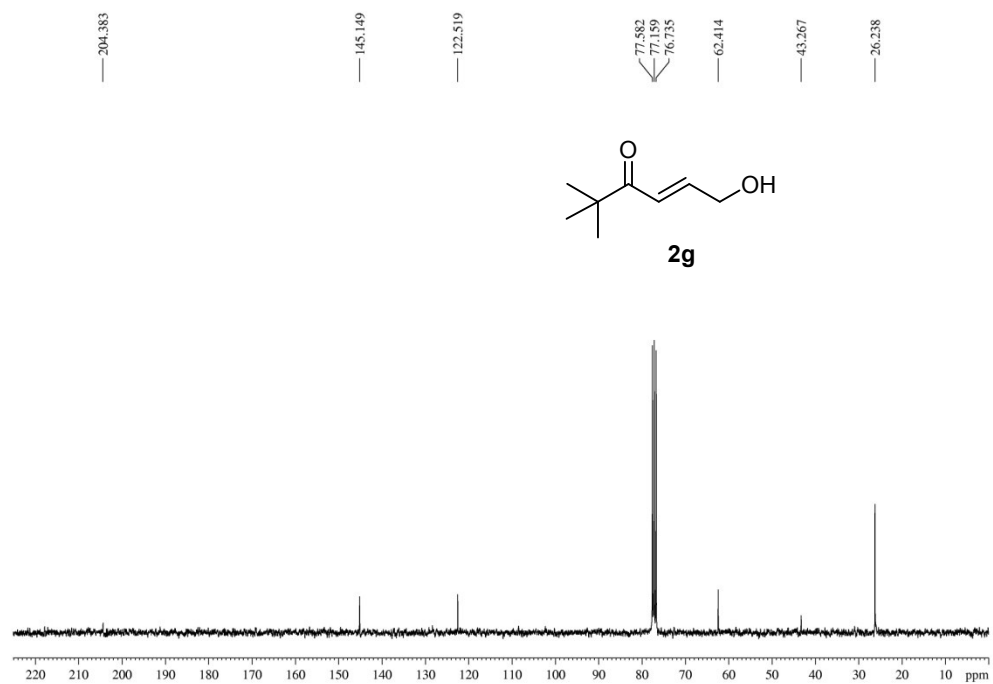

Figure S14: <sup>13</sup>C NMR spectra of compound **2g**.

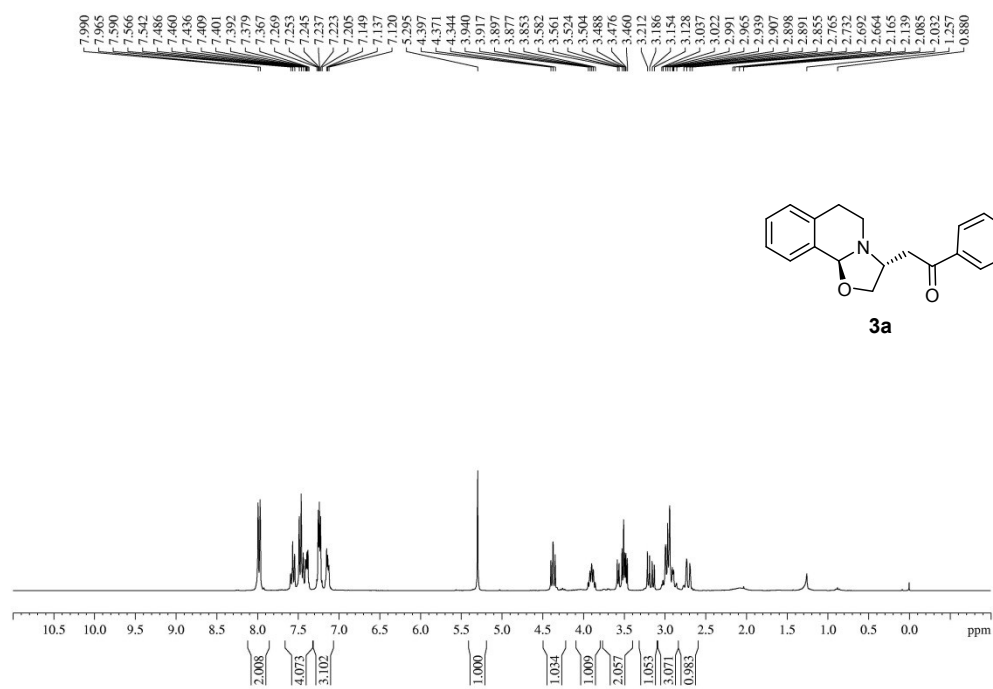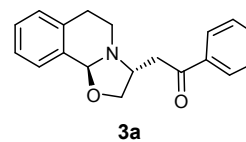

Figure S15:  $^1\text{H}$  NMR spectra of compound **3a**.

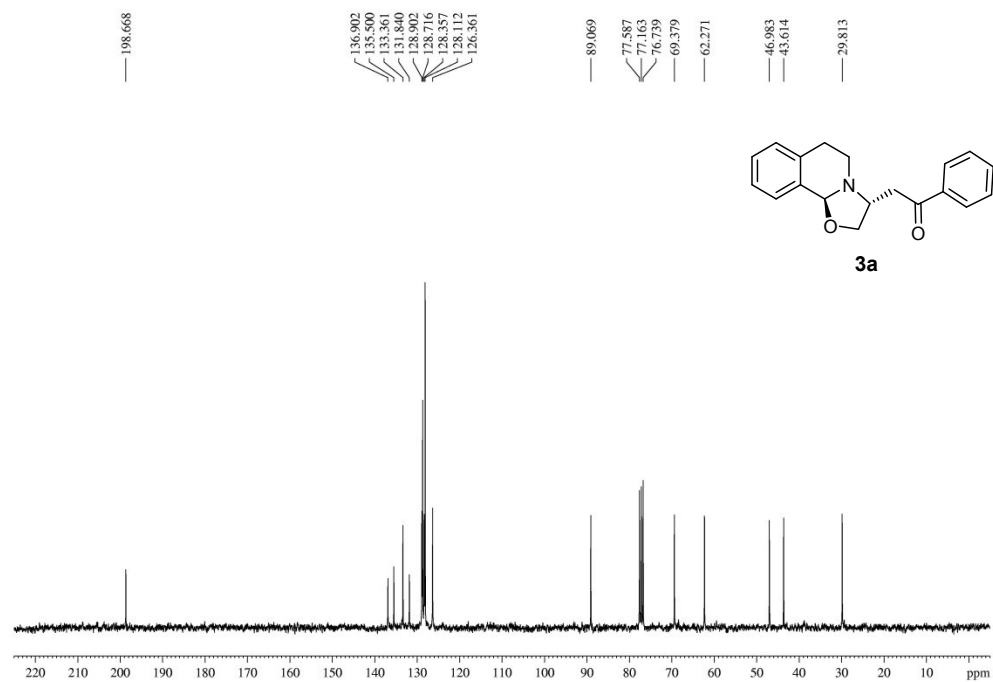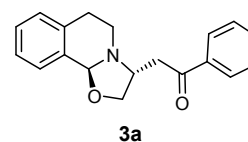

Figure S16:  $^{13}\text{C}$  NMR spectra of compound **3a**.



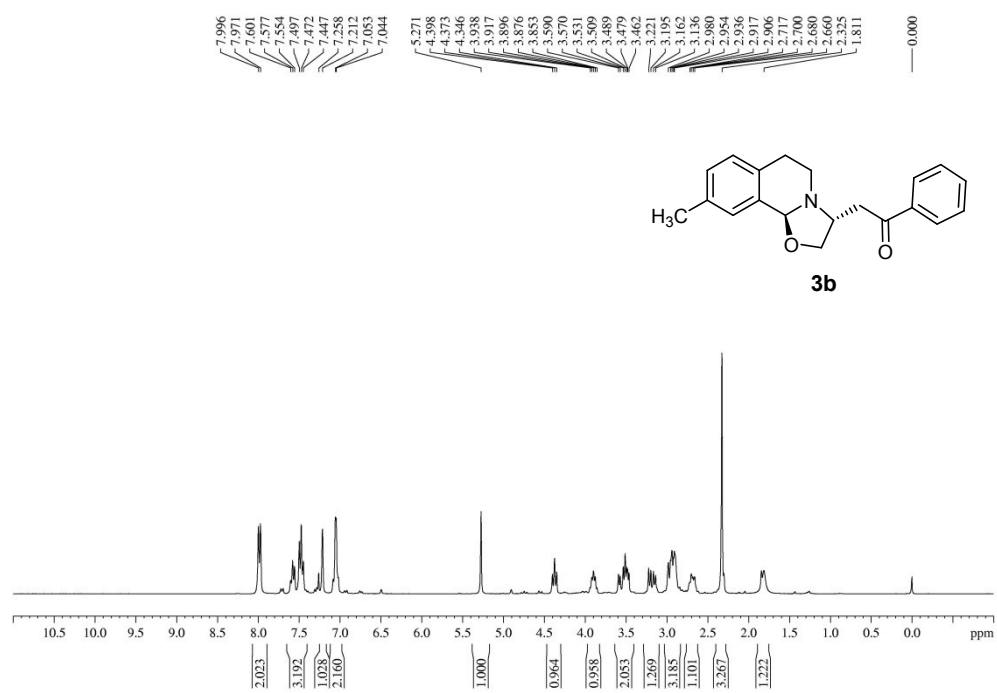

Figure S17: <sup>1</sup>H NMR spectra of compound **3b**.

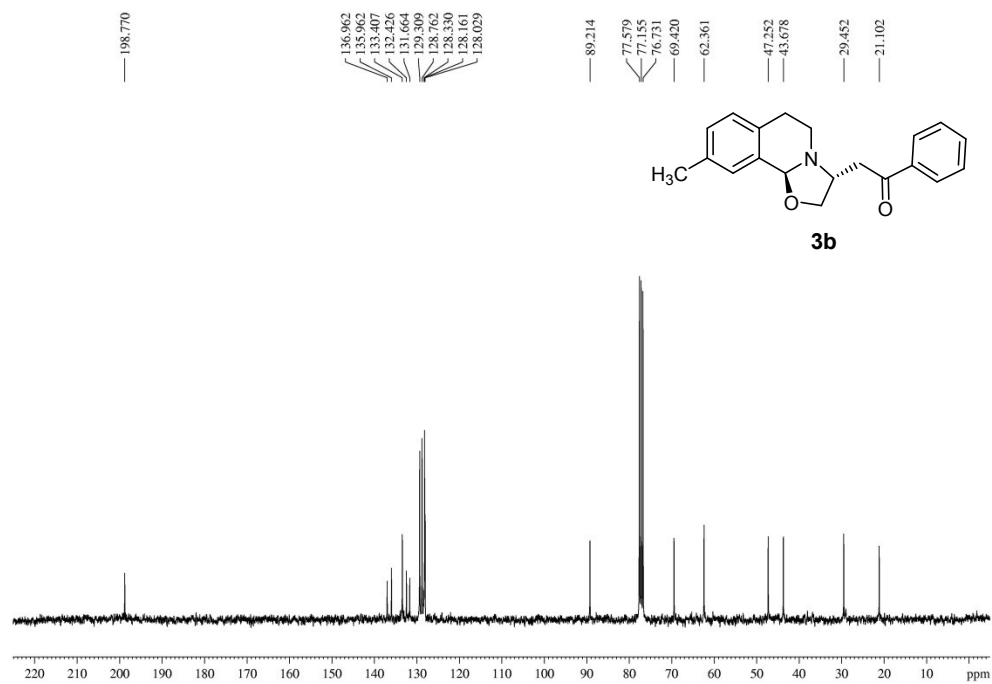

Figure S18: <sup>13</sup>C NMR spectra of compound **3b**.

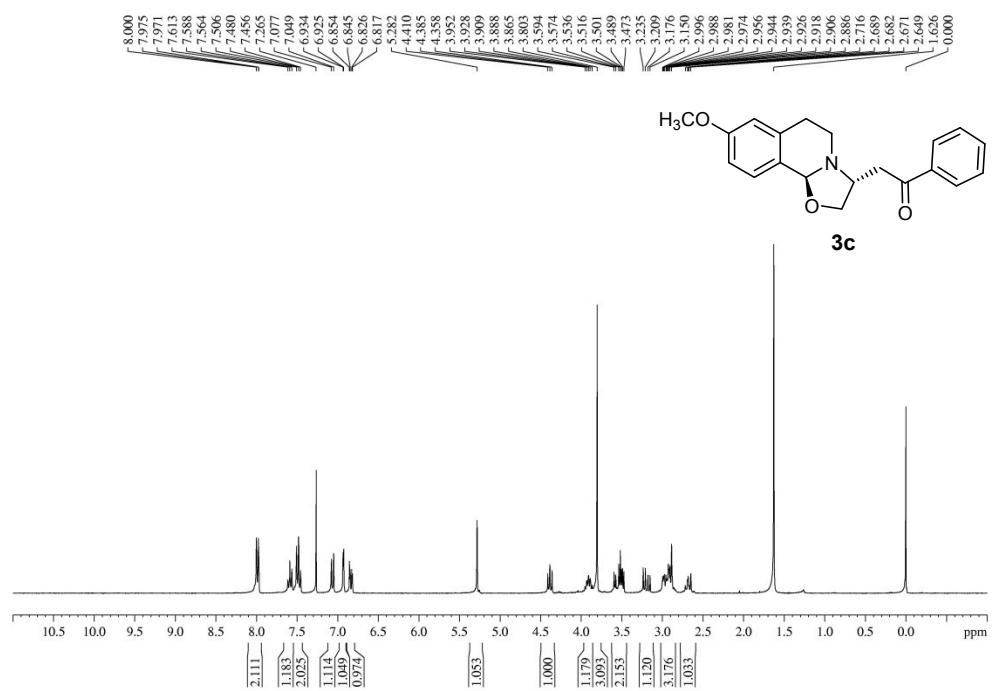

Figure S19: <sup>1</sup>H NMR spectra of compound **3c**.

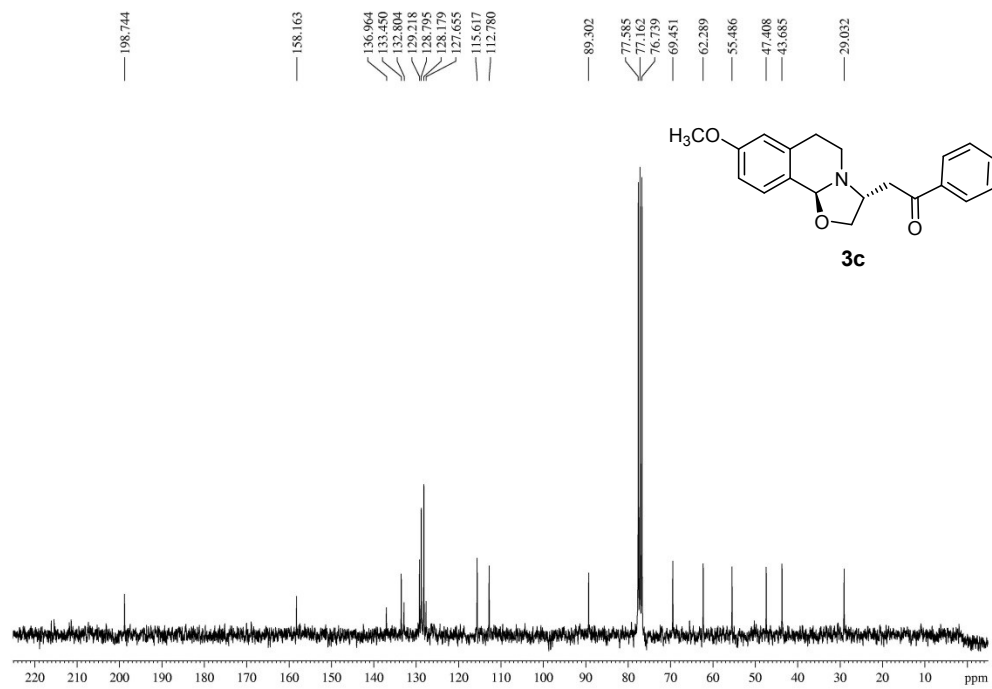

Figure S20: <sup>13</sup>C NMR spectra of compound **3c**.

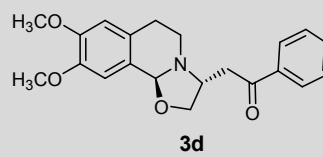

**Figure S21:**  $^1\text{H}$  NMR spectra of compound **3d**.

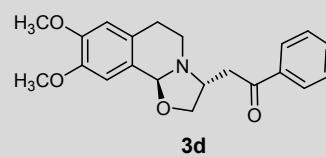

**Figure S22:**  $^{13}\text{C}$  NMR spectra of compound **3d**.

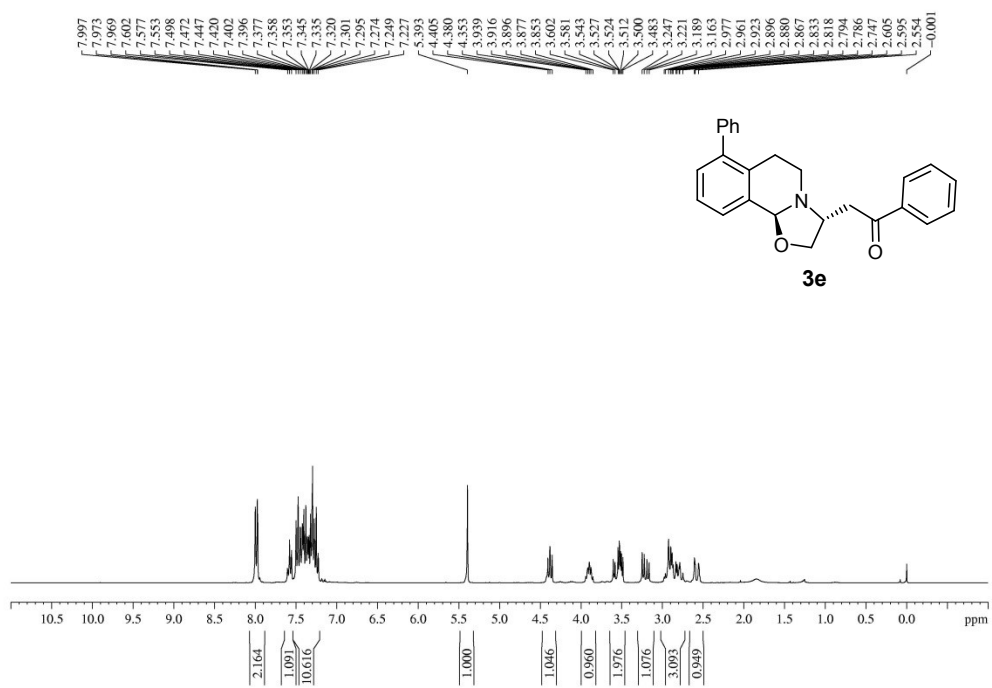

Figure S23: <sup>1</sup>H NMR spectra of compound **3e**.

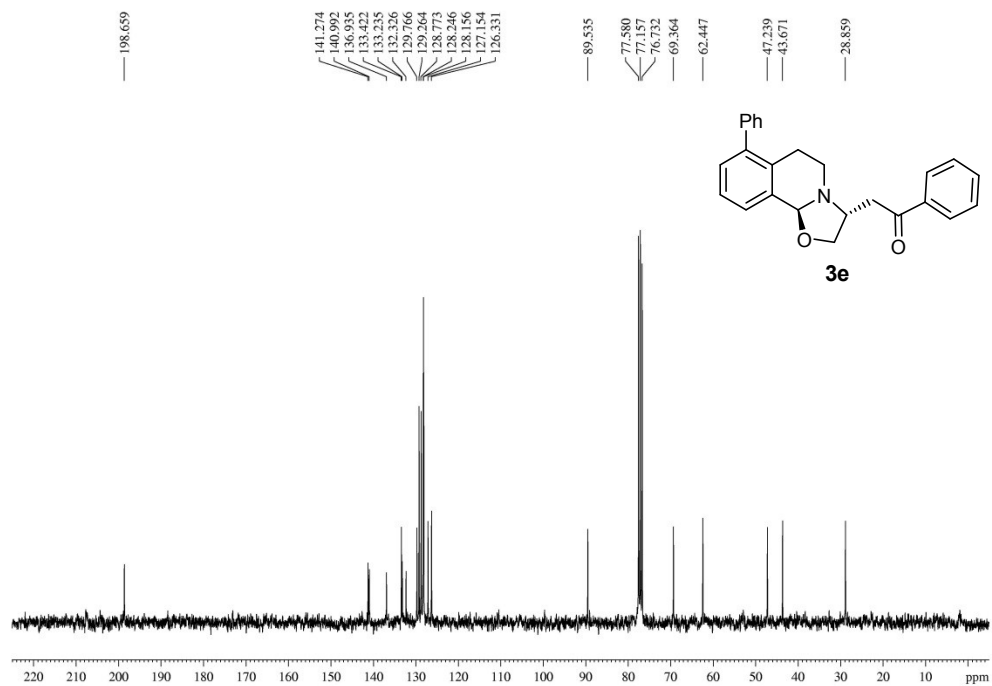

Figure S24: <sup>13</sup>C NMR spectra of compound **3e**.

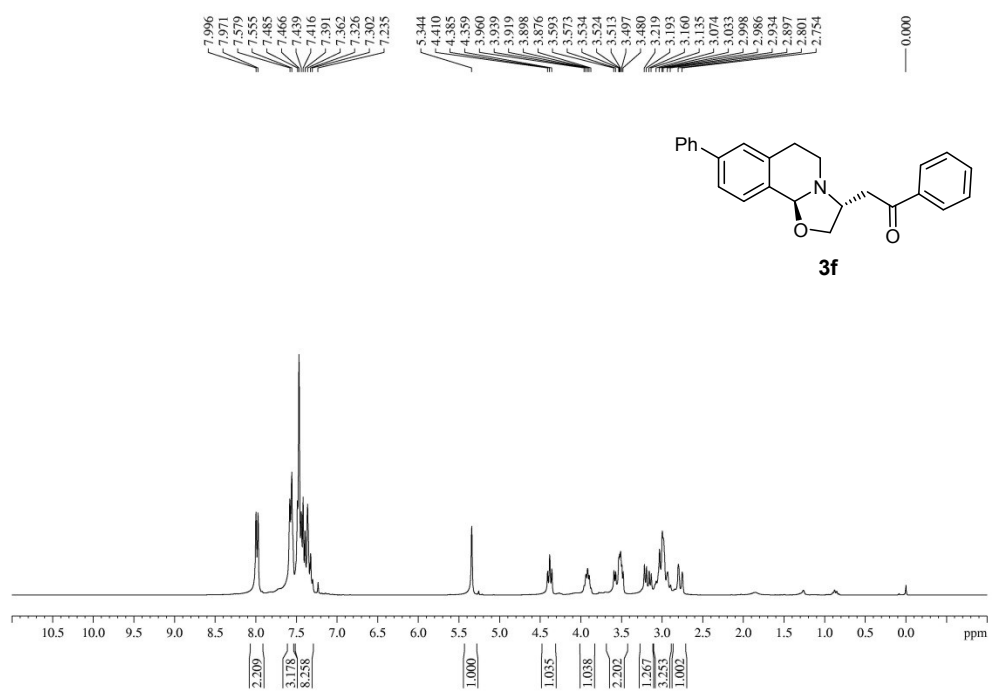

Figure S25:  $^1\text{H}$  NMR spectra of compound **3f**.

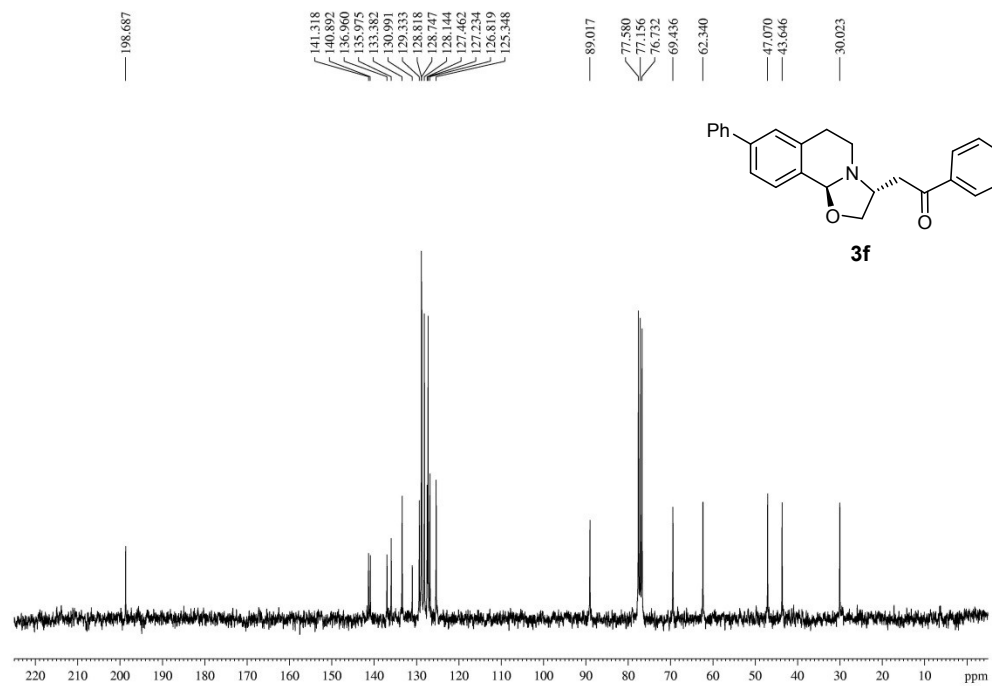

Figure S26:  $^{13}\text{C}$  NMR spectra of compound **3f**.

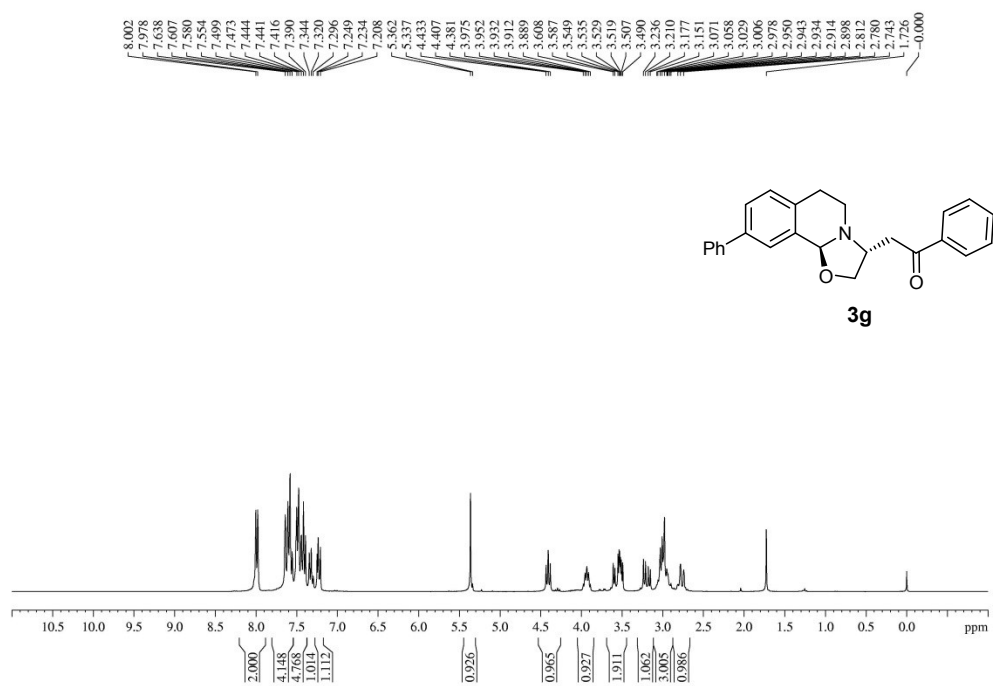

Figure S27:  $^1\text{H}$  NMR spectra of compound **3g**.

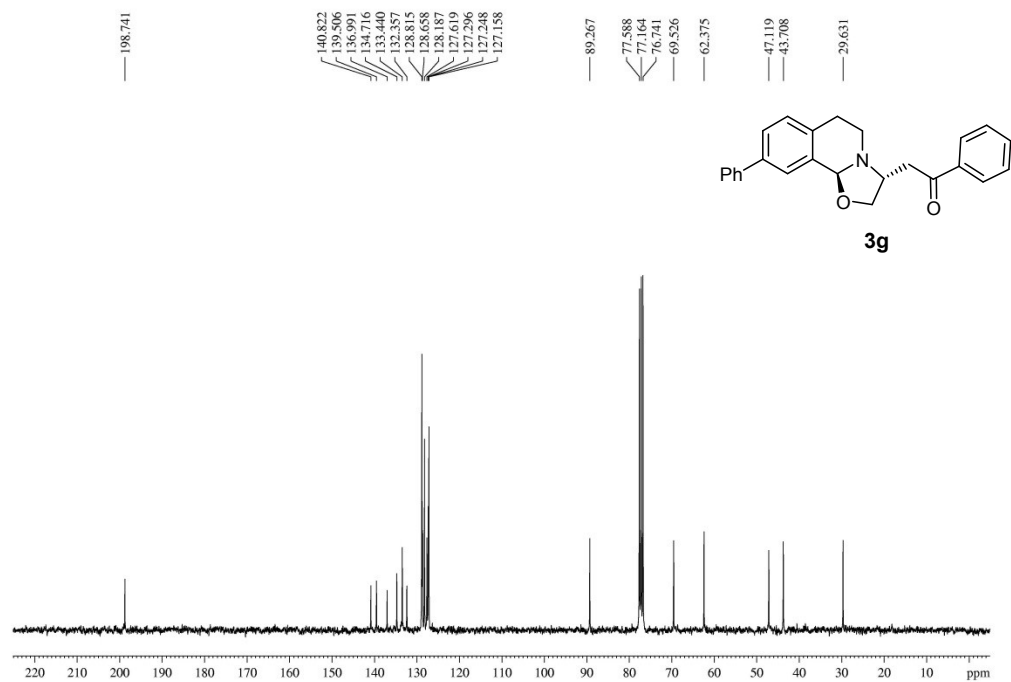

Figure S28:  $^{13}\text{C}$  NMR spectra of compound **3g**.

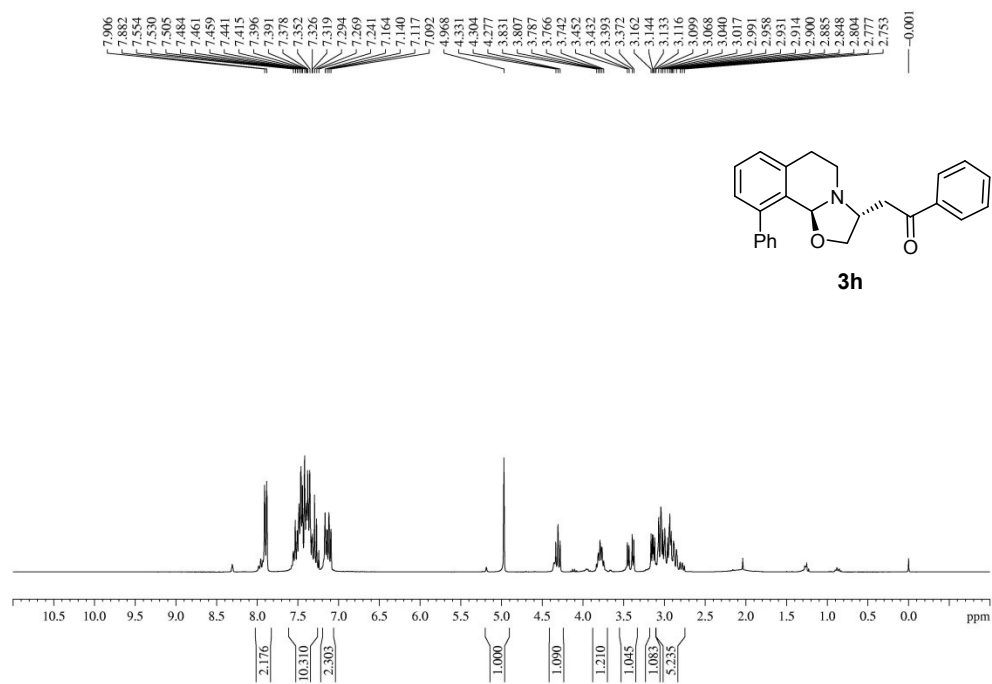

Figure S29:  $^1\text{H}$  NMR spectra of compound **3h**.

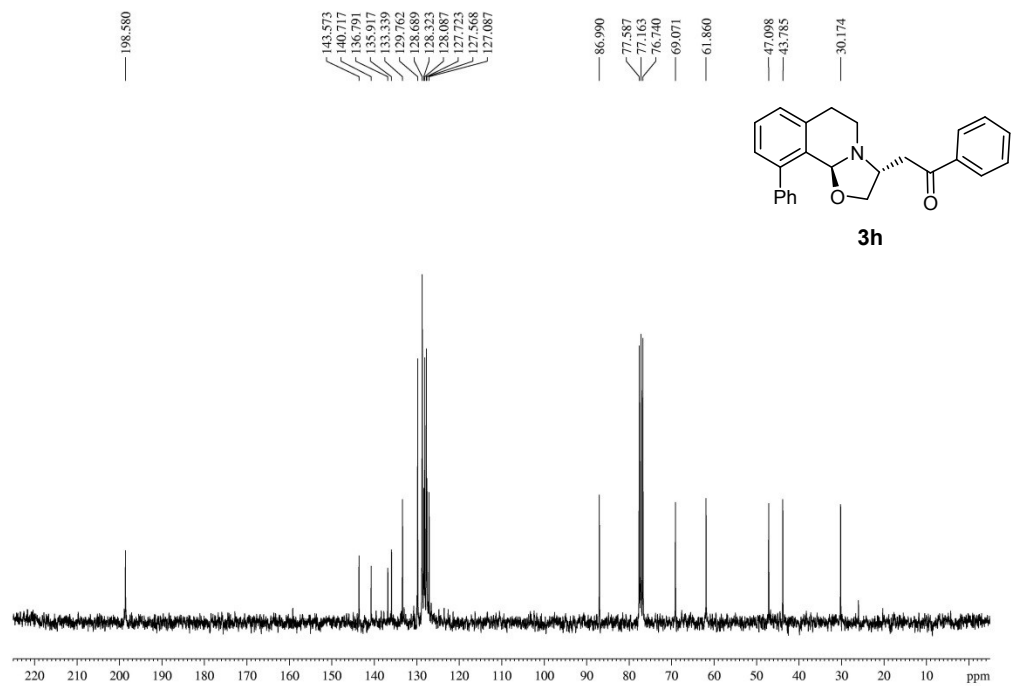

Figure S30:  $^{13}\text{C}$  NMR spectra of compound **3h**.

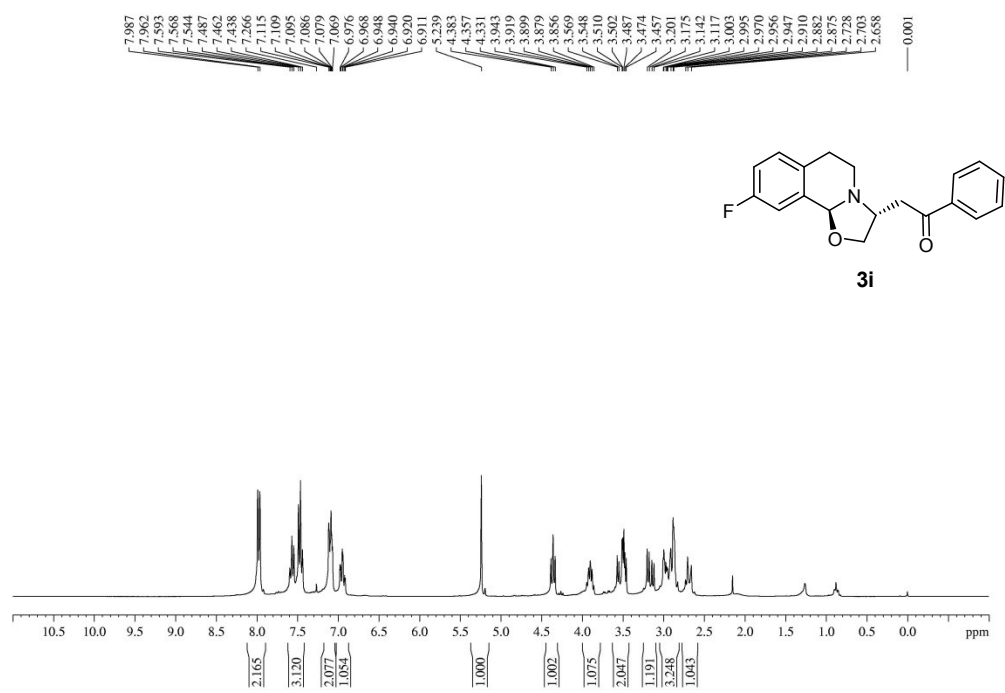

Figure S31:  $^1\text{H}$  NMR spectra of compound **3i**.

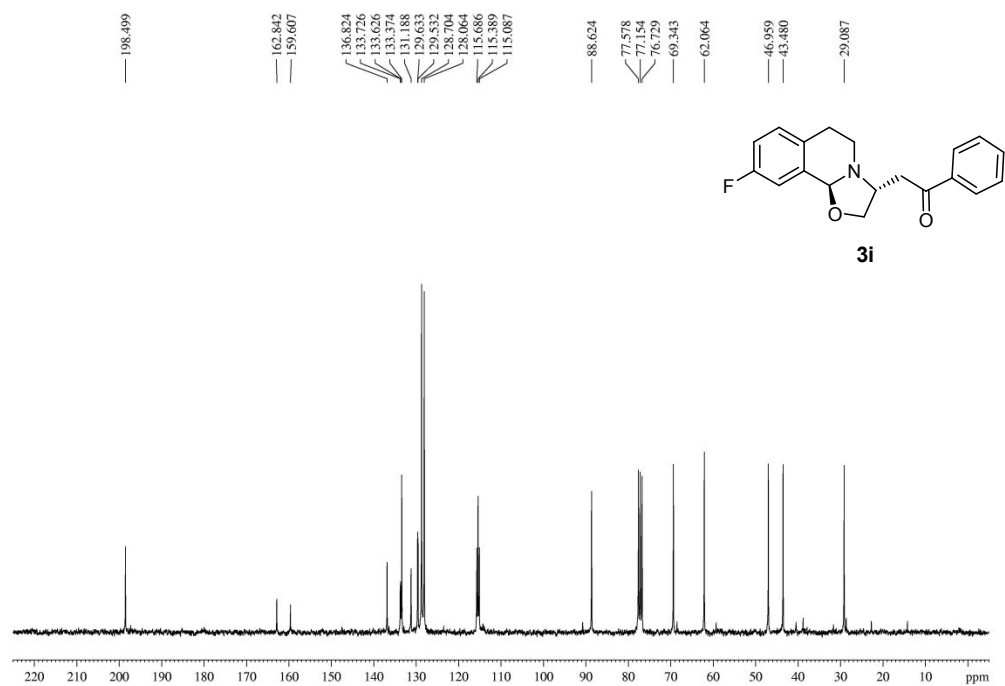

Figure S32:  $^{13}\text{C}$  NMR spectra of compound **3i**.



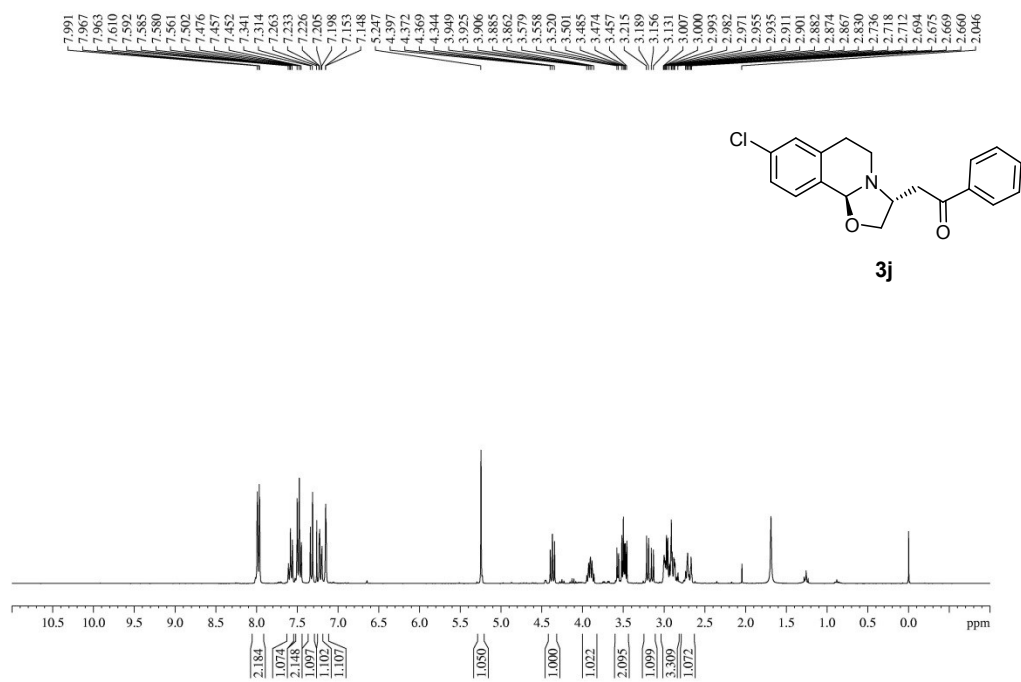

Figure S33:  $^1\text{H}$  NMR spectra of compound **3j**.

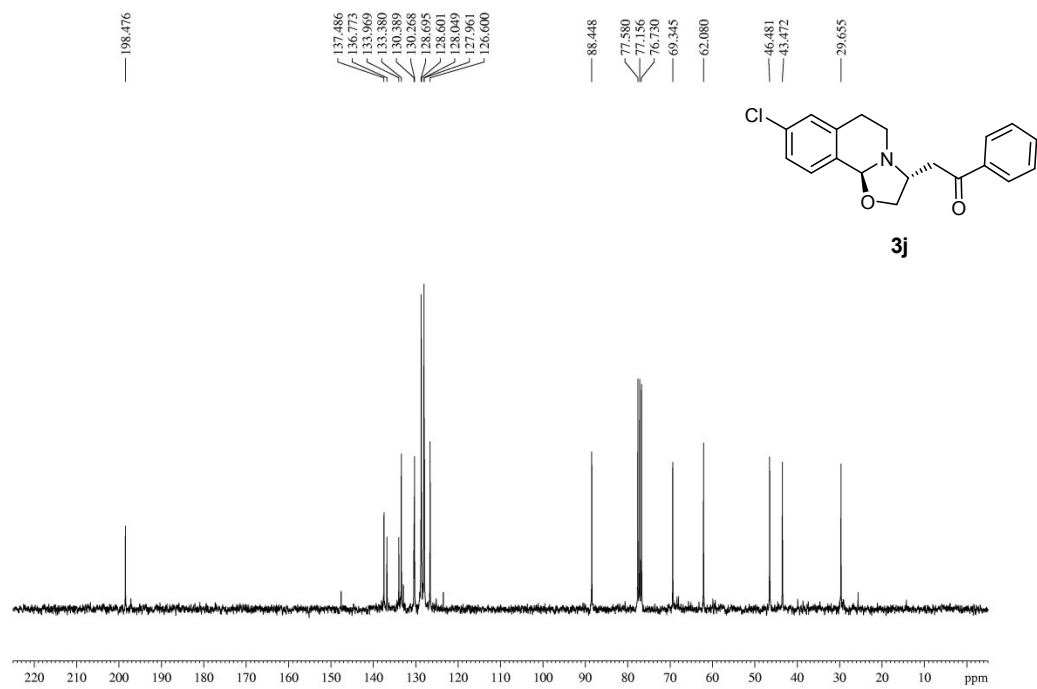

Figure S34:  $^{13}\text{C}$  NMR spectra of compound **3j**.

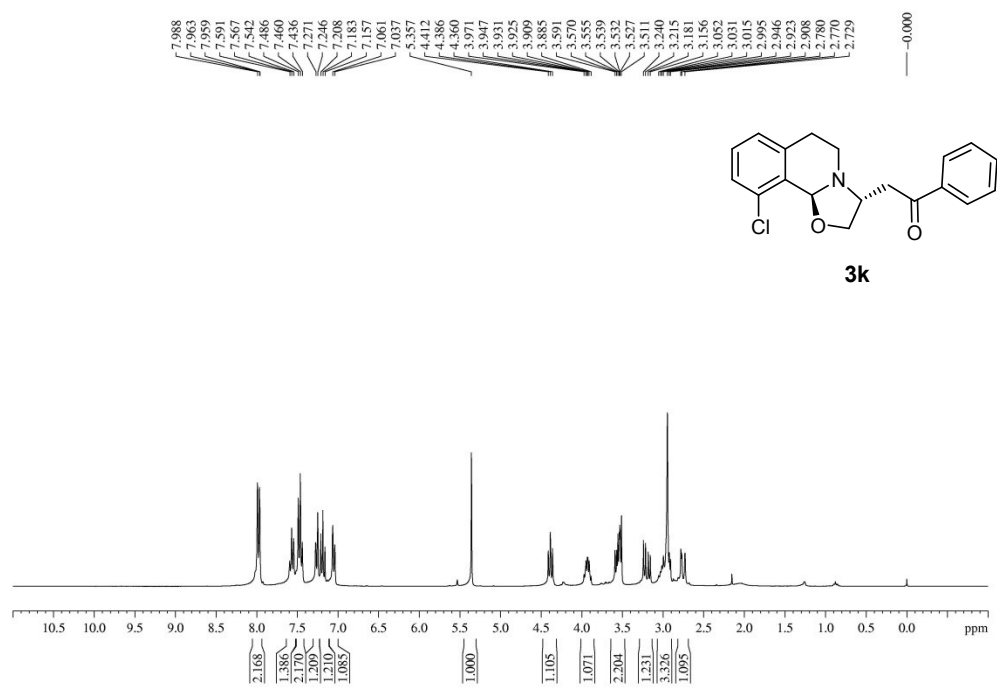

Figure S35: <sup>1</sup>H NMR spectra of compound **3k**.

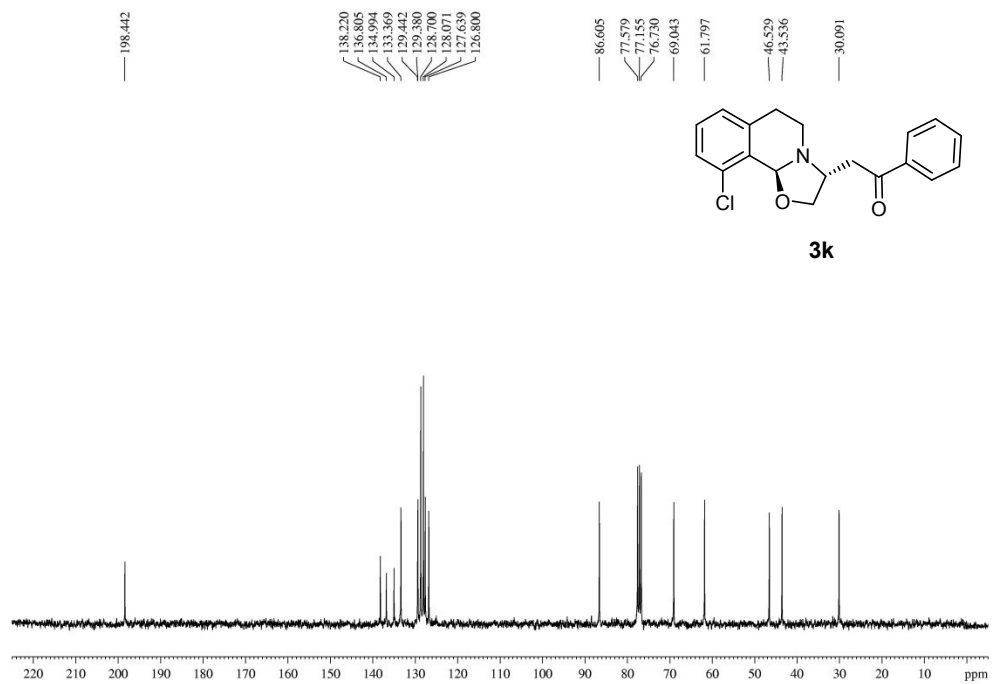

Figure S36: <sup>13</sup>C NMR spectra of compound **3k**.

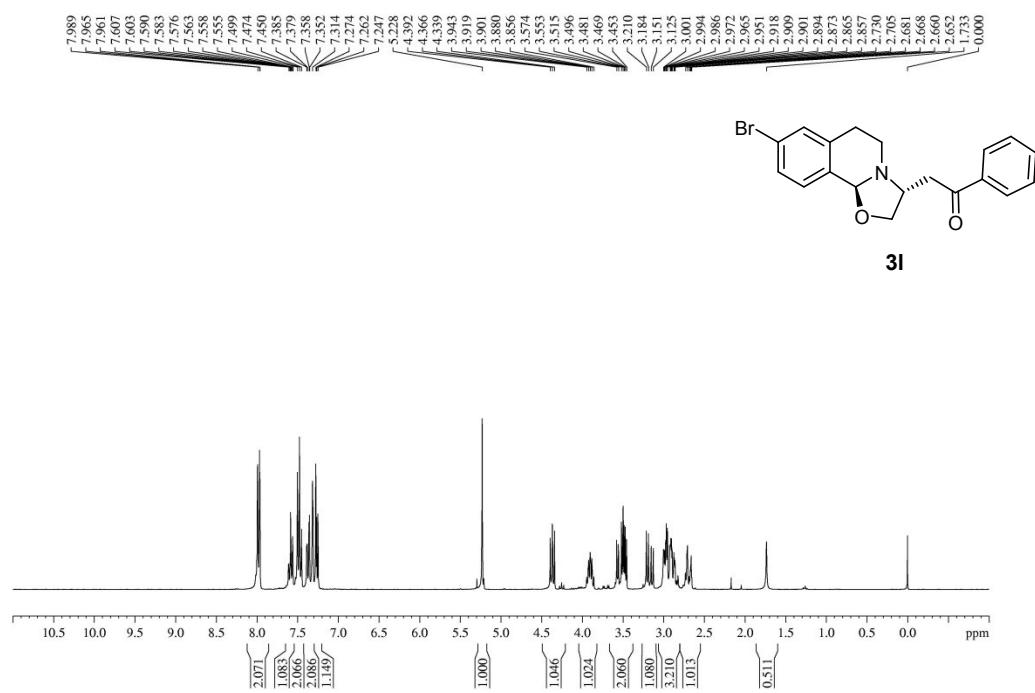

Figure S37: <sup>1</sup>H NMR spectra of compound **3I**

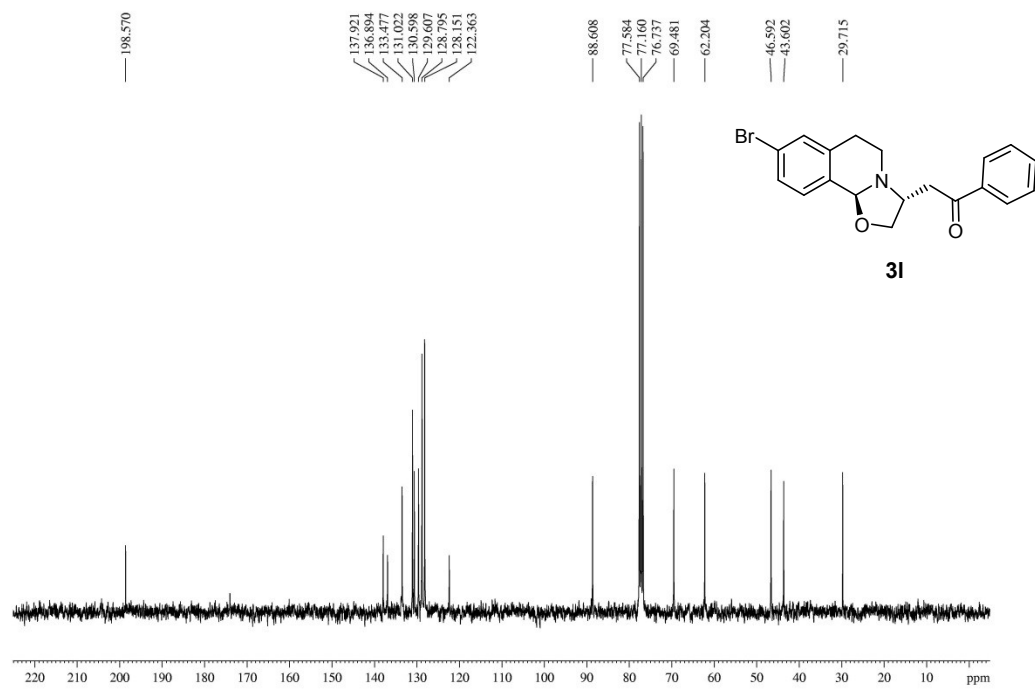

Figure S38: <sup>13</sup>C NMR spectra of compound **3I**.

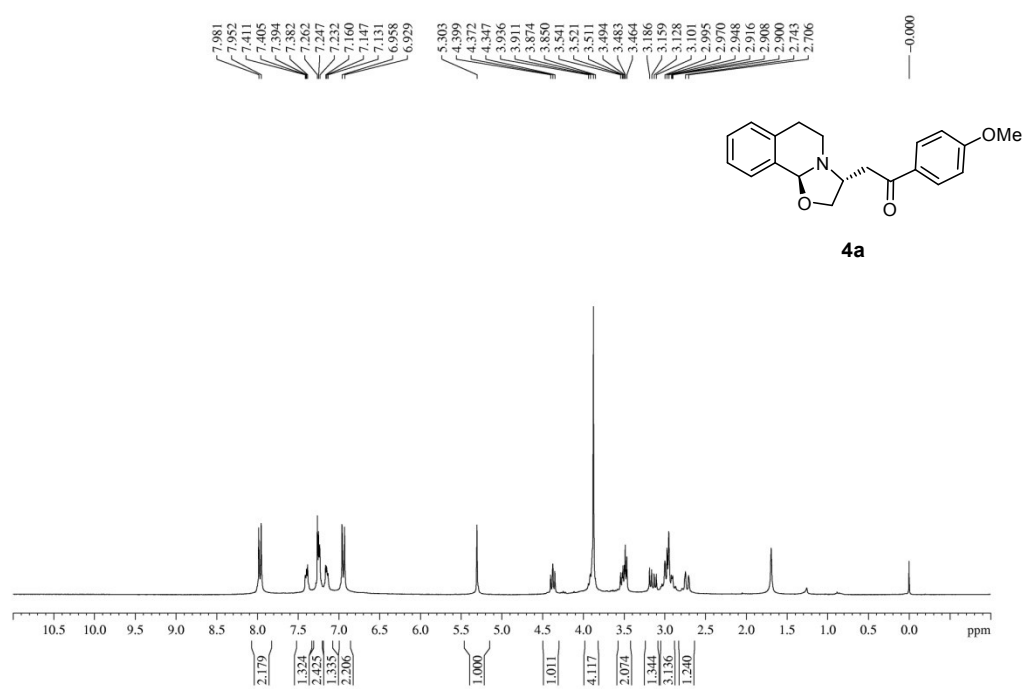

Figure S39: <sup>1</sup>H NMR spectra of compound **4a**.

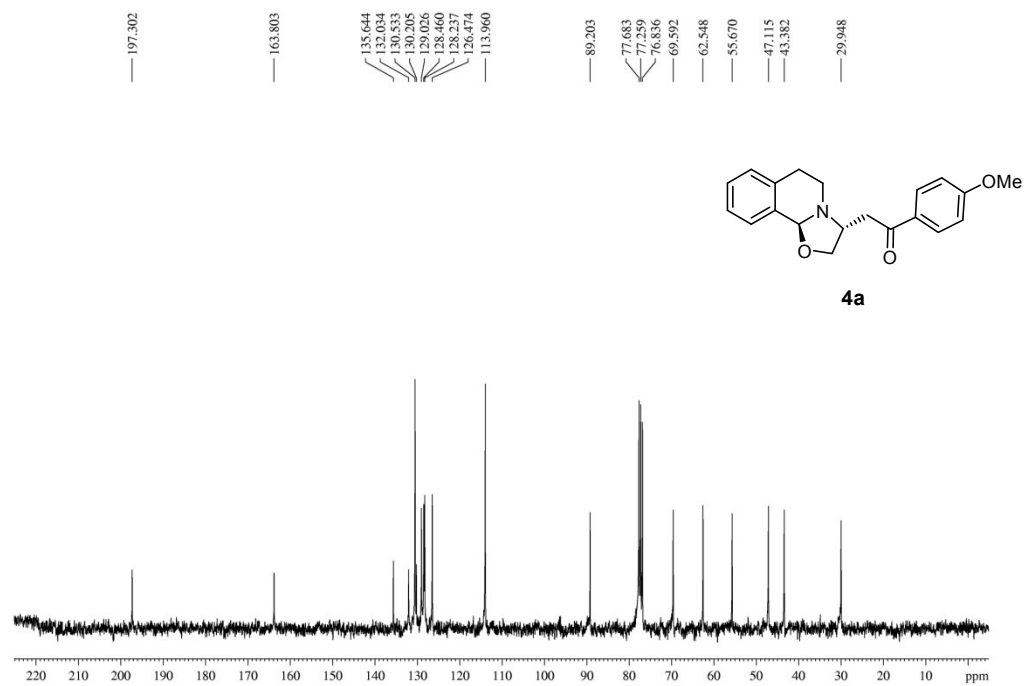

Figure S40: <sup>13</sup>C NMR spectra of compound **4a**.

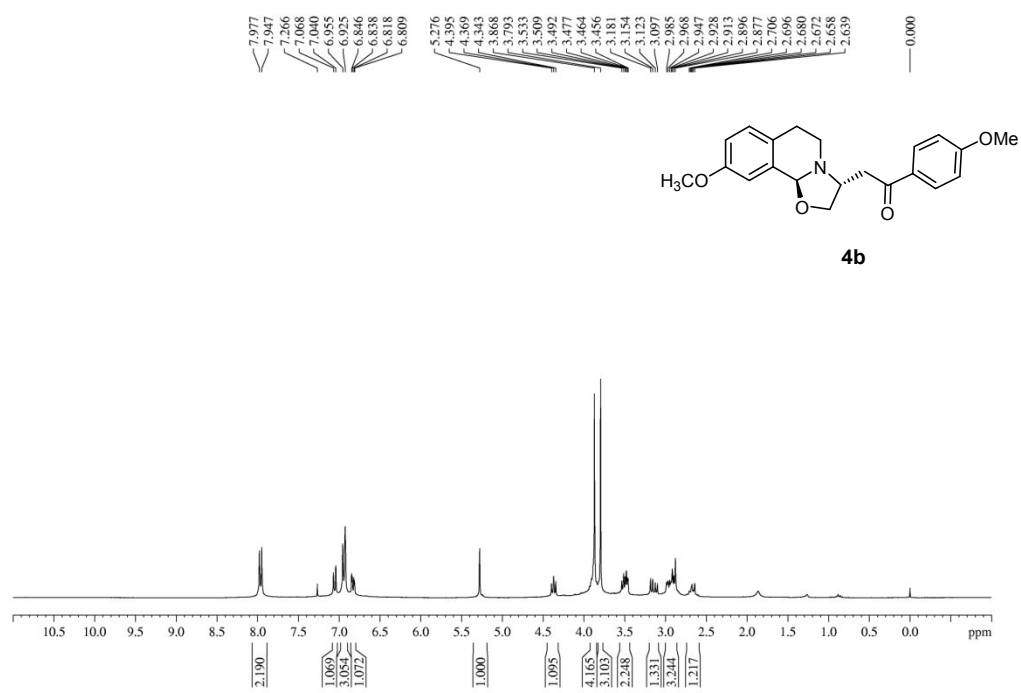

Figure S41: <sup>1</sup>H NMR spectra of compound **4b**

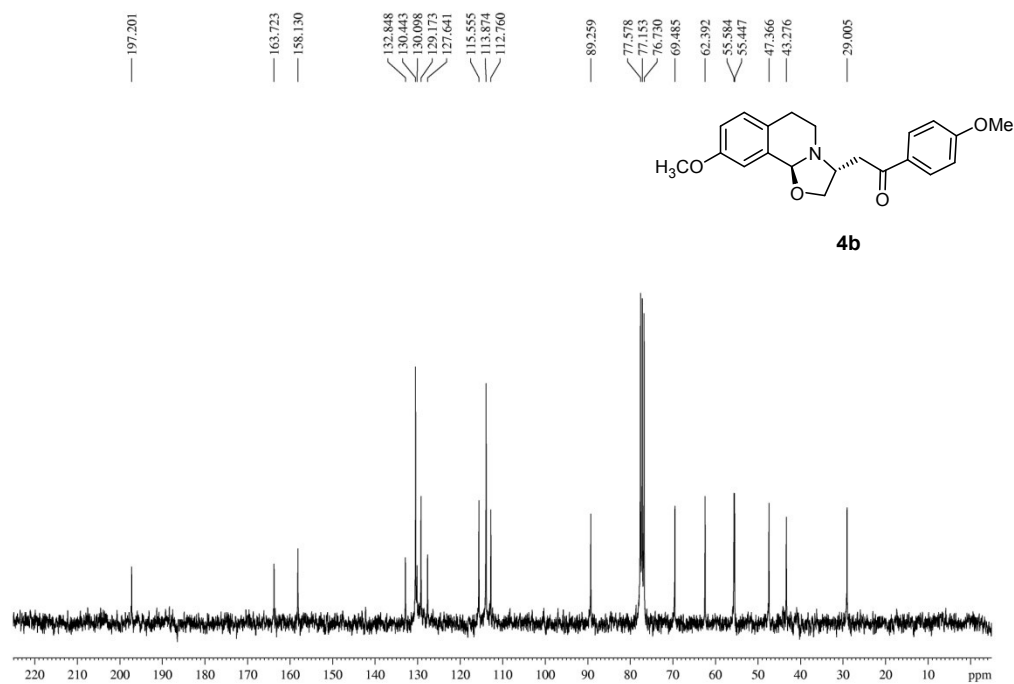

Figure S42: <sup>13</sup>C NMR spectra of compound **4b**.

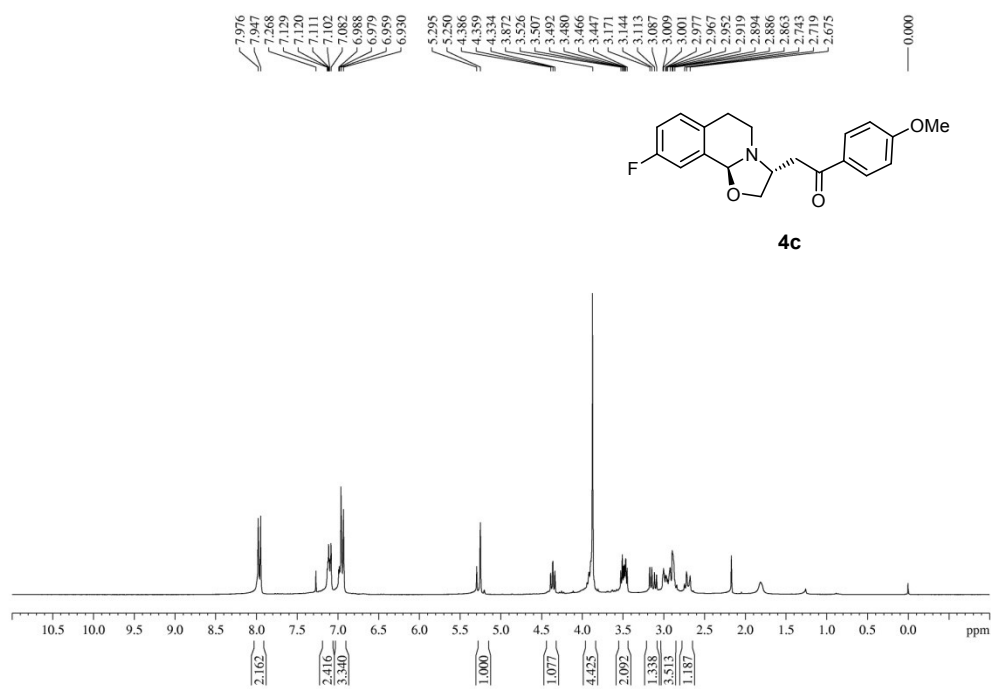

Figure S43: <sup>1</sup>H NMR spectra of compound **4c**

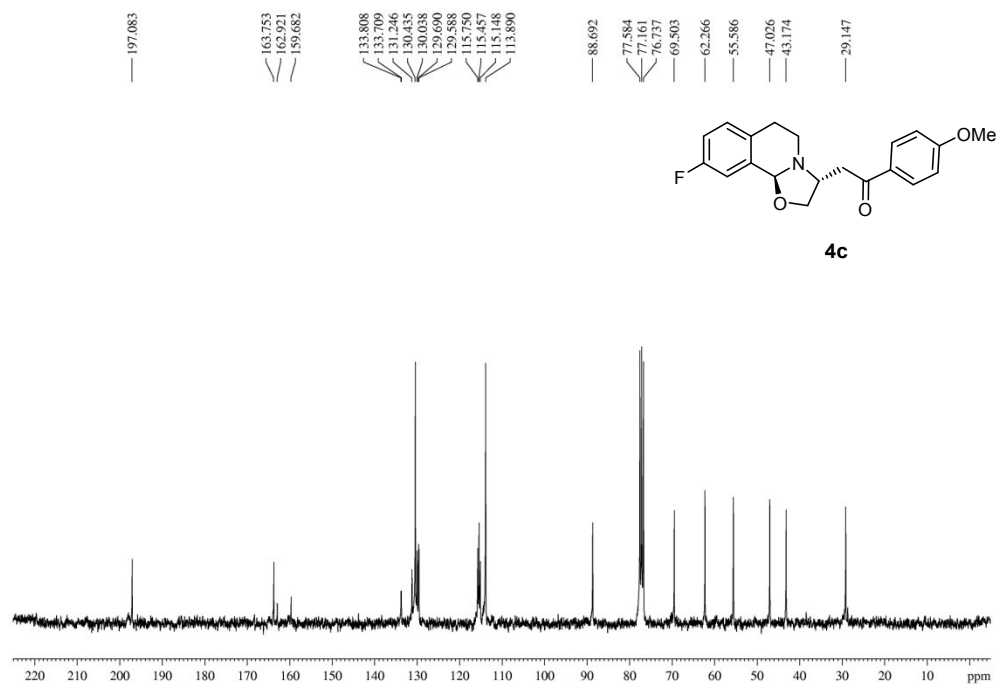

Figure S44: <sup>13</sup>C NMR spectra of compound **4c**.

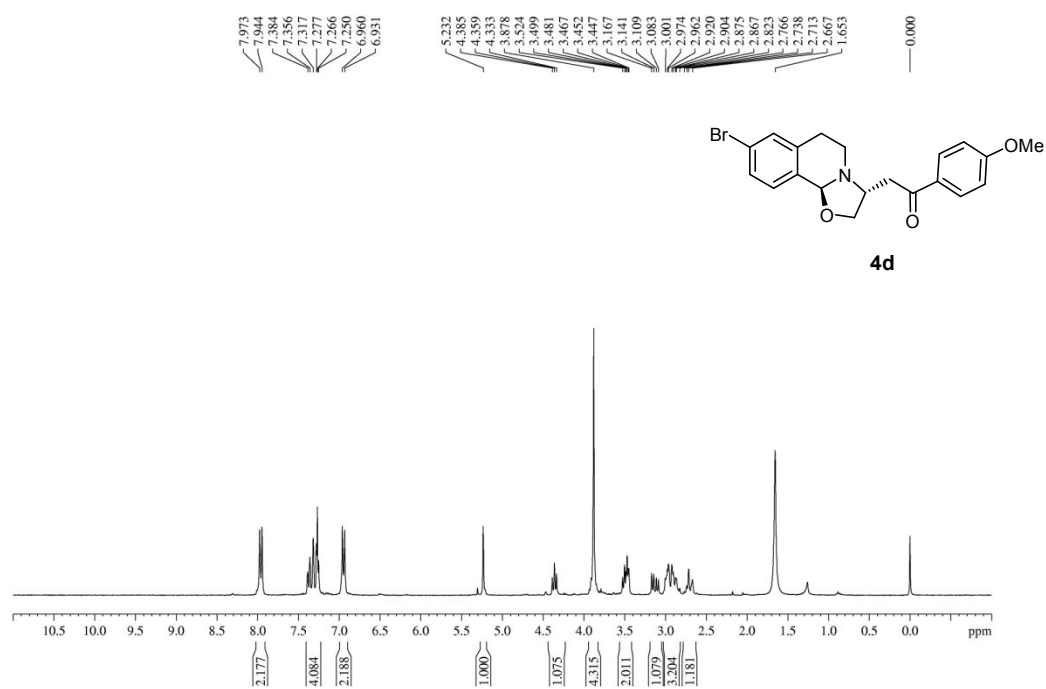

Figure S45: <sup>1</sup>H NMR spectra of compound **4d**

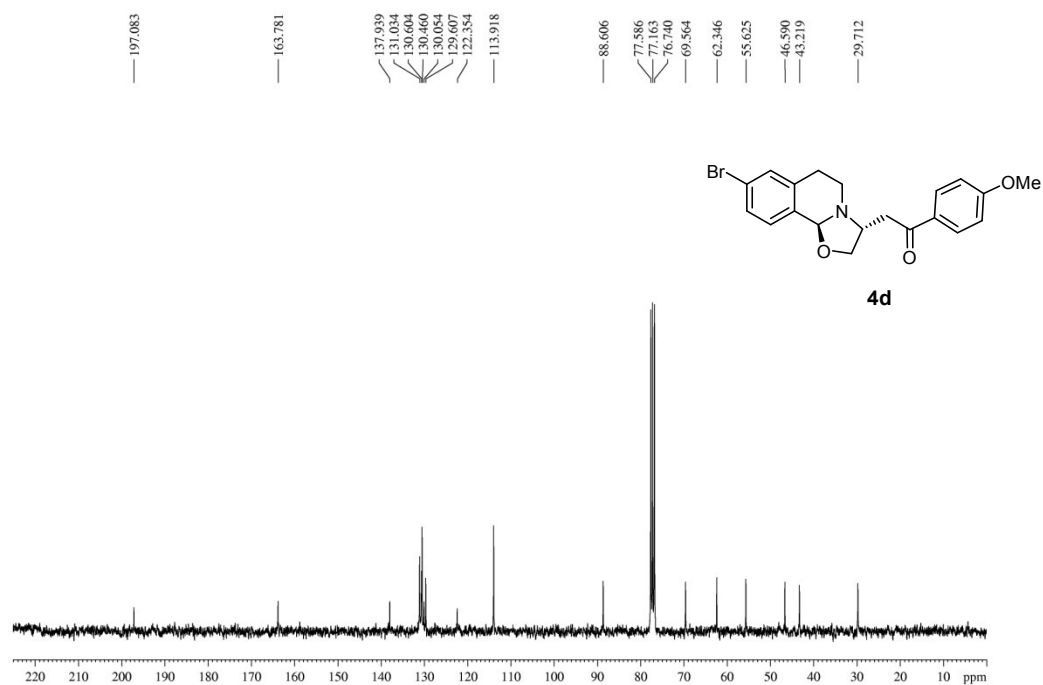

Figure S46: <sup>13</sup>C NMR spectra of compound **4d**.

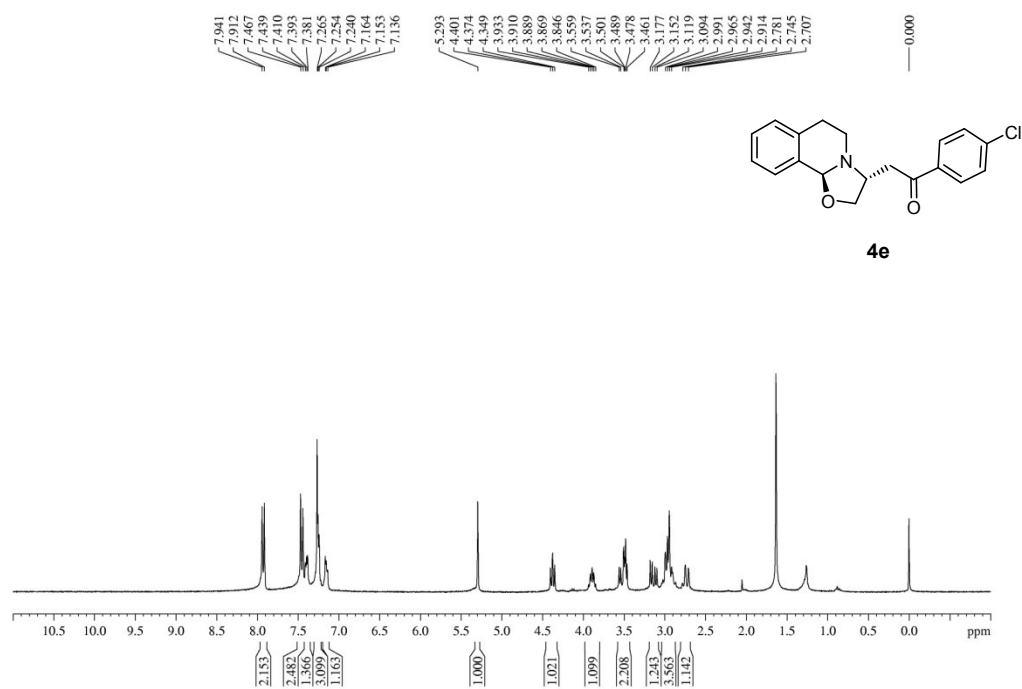

Figure S47:  $^1\text{H}$  NMR spectra of compound **4e**

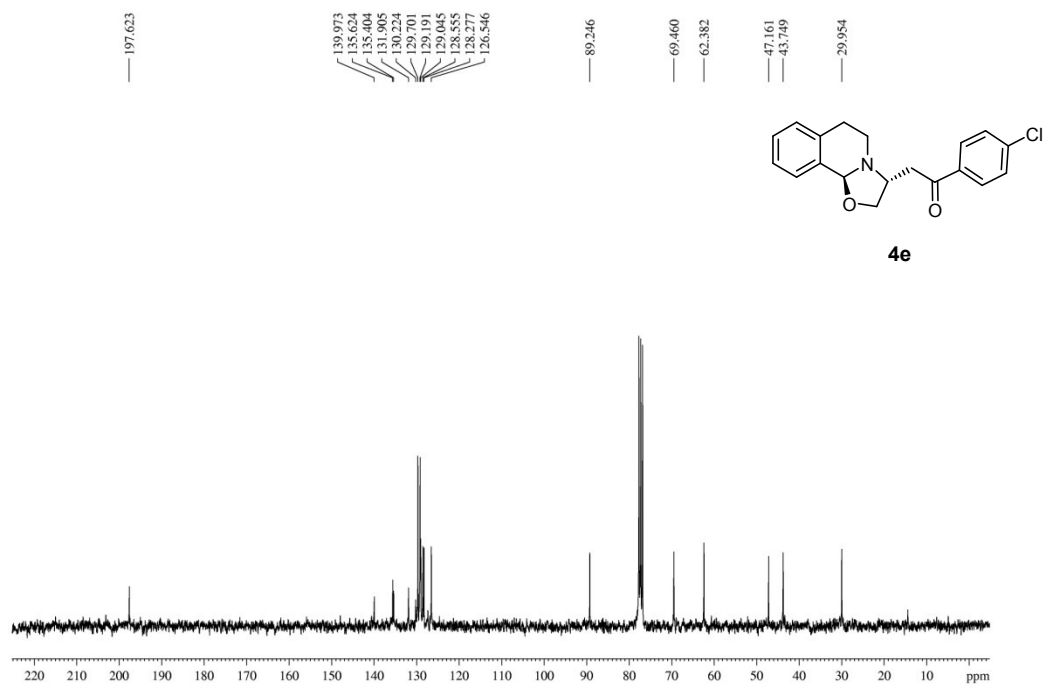

Figure S48:  $^{13}\text{C}$  NMR spectra of compound **4e**.



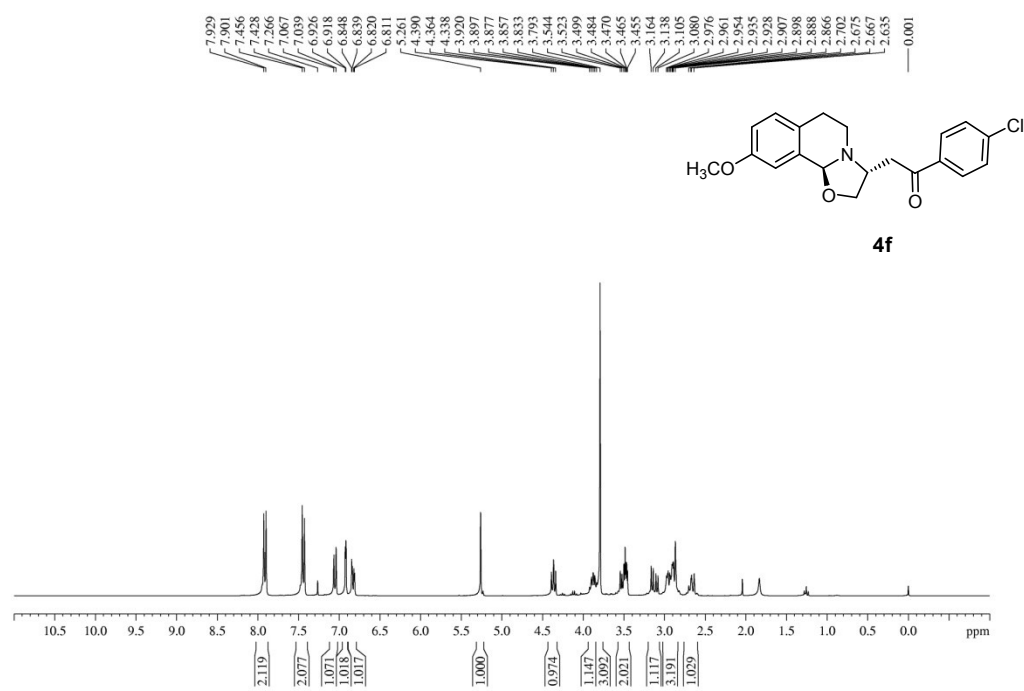

Figure S49: <sup>1</sup>H NMR spectra of compound **4f**

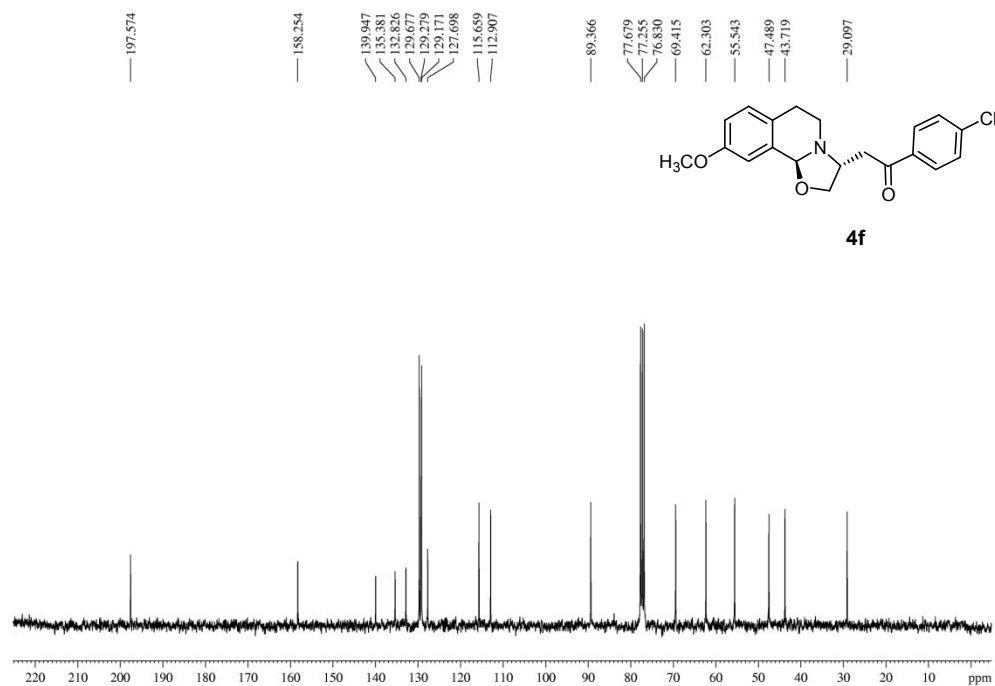

Figure S50: <sup>13</sup>C NMR spectra of compound **4f**.

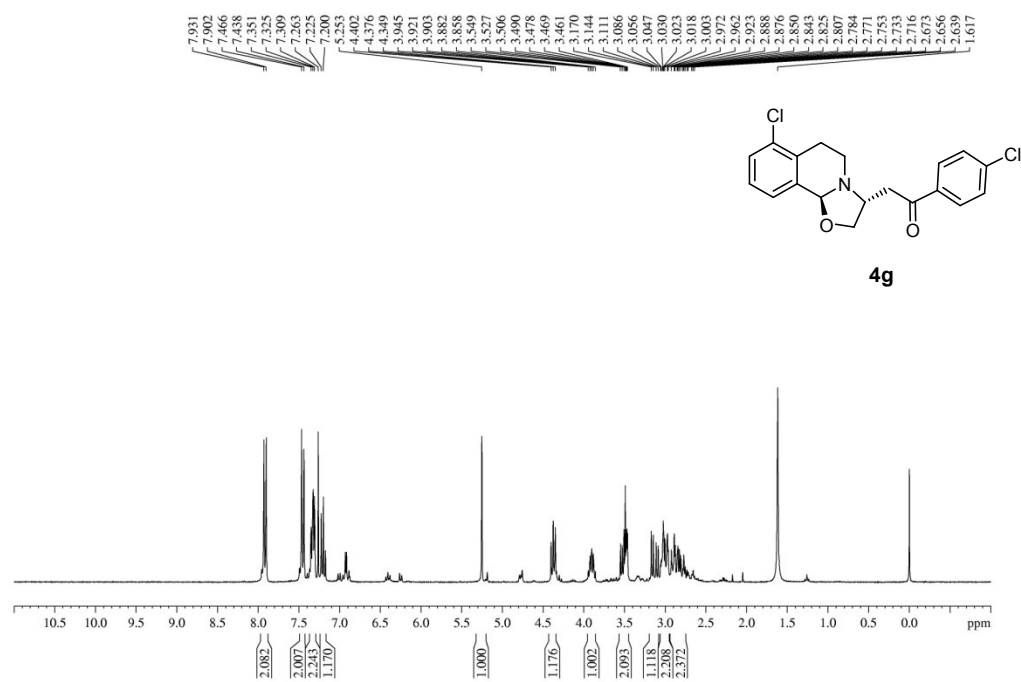

Figure S51:  $^1\text{H}$  NMR spectra of compound **4g**.

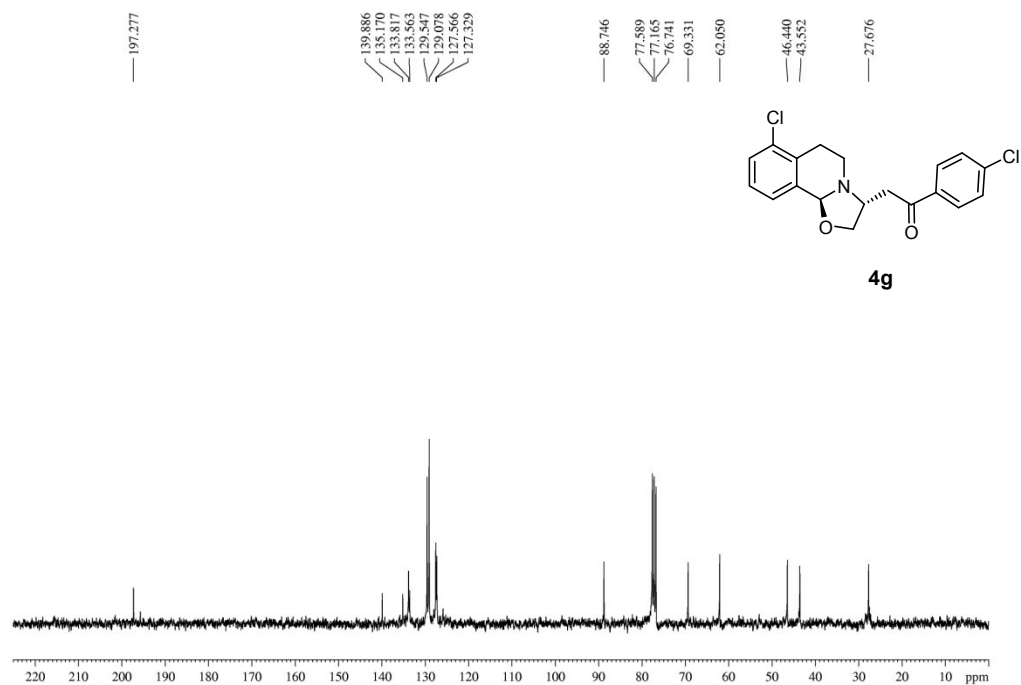

Figure S52:  $^{13}\text{C}$  NMR spectra of compound **4g**.

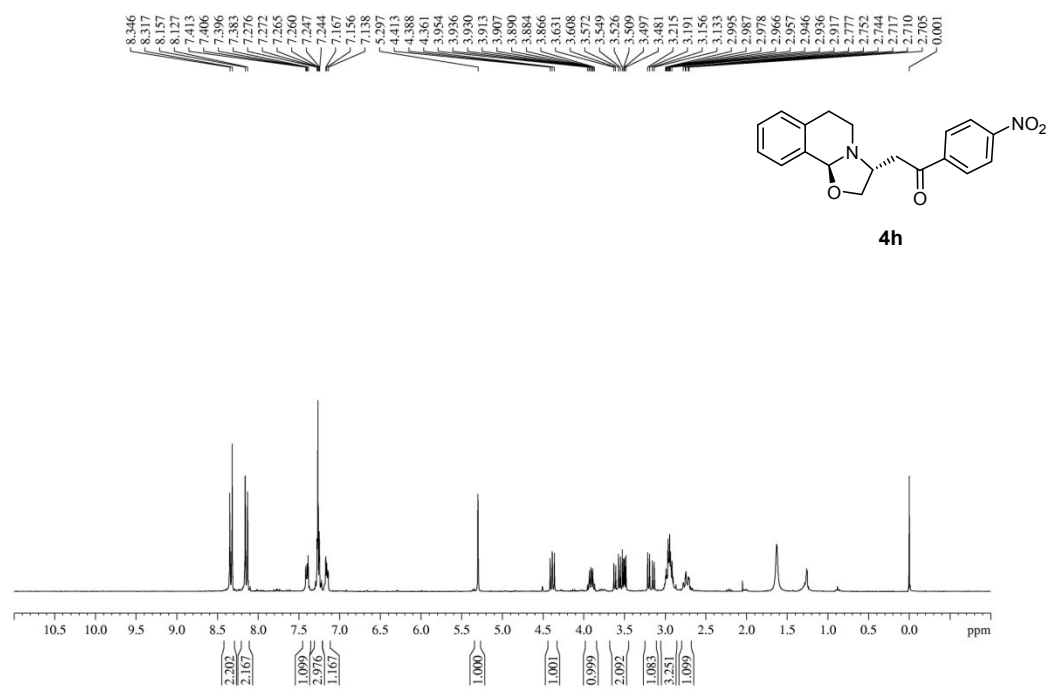

Figure S53:  $^1\text{H}$  NMR spectra of compound 4h.

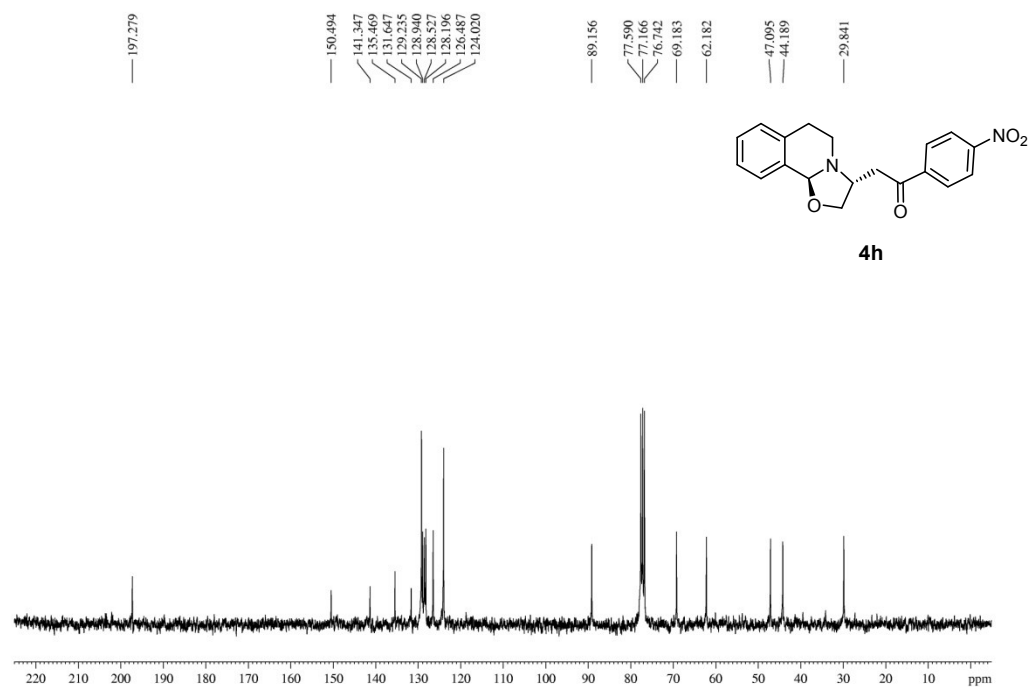

Figure S54:  $^{13}\text{C}$  NMR spectra of compound 4h.

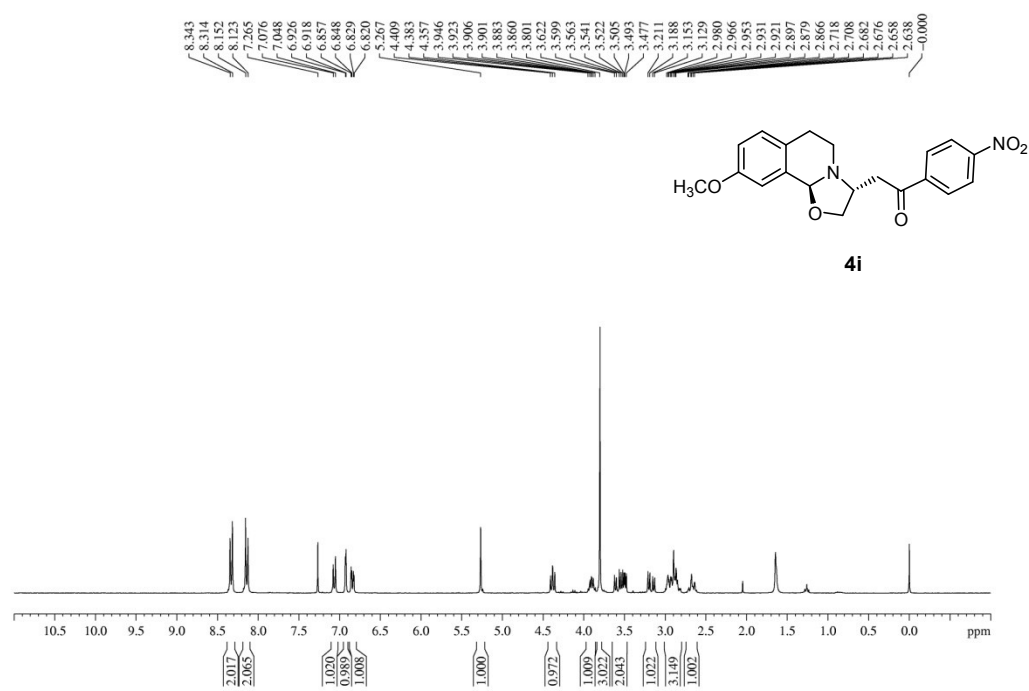

Figure S55: <sup>1</sup>H NMR spectra of compound **4i**.

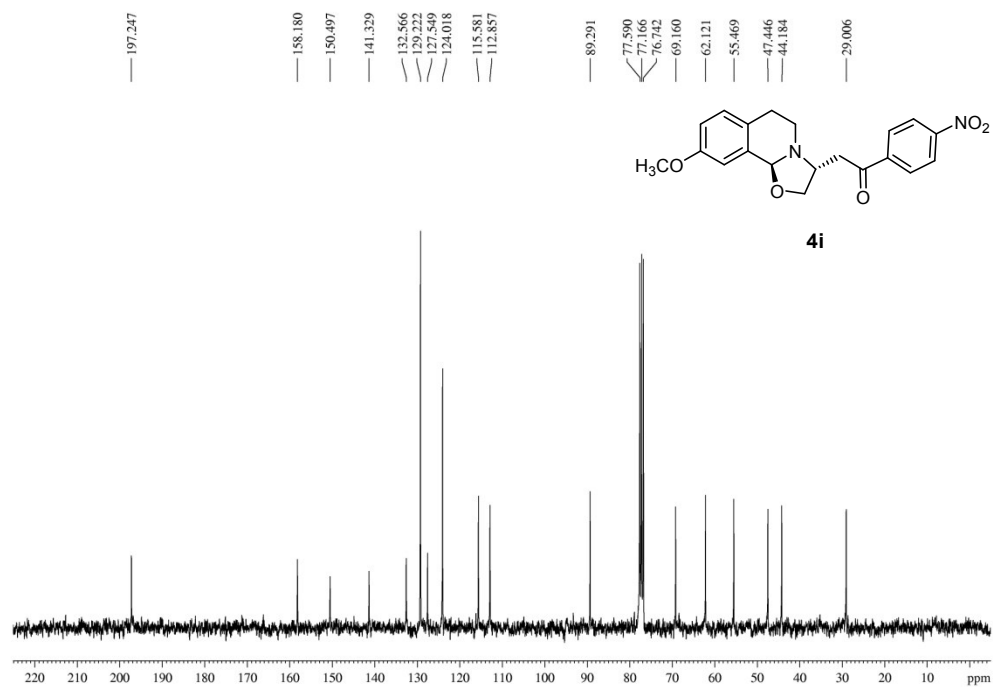

Figure S56: <sup>13</sup>C NMR spectra of compound **4i**.

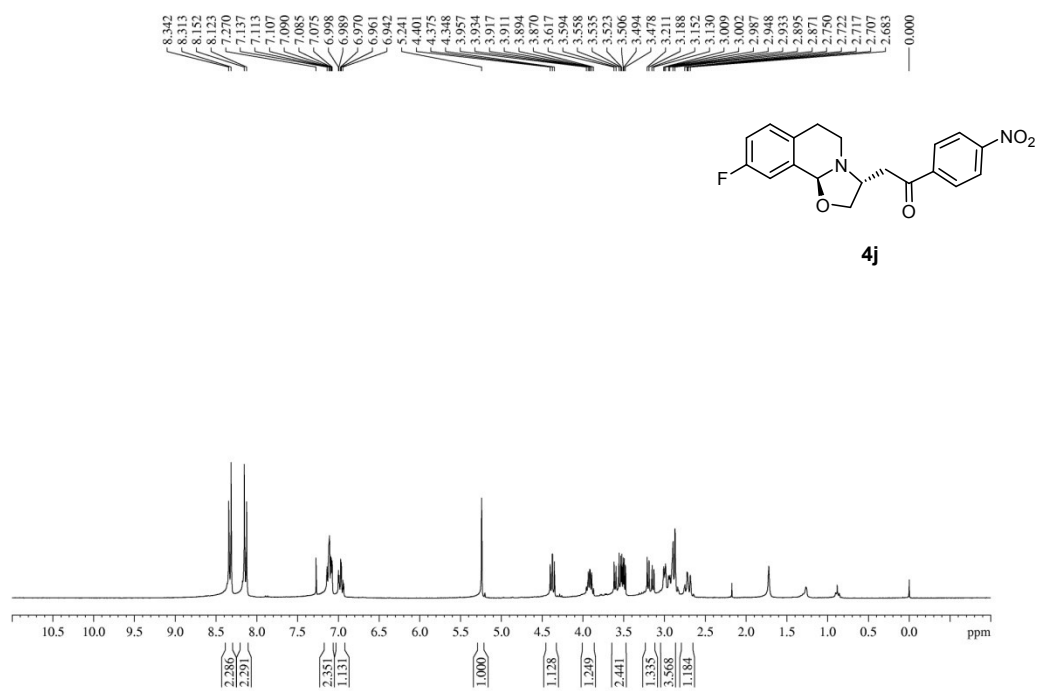

Figure S57: <sup>1</sup>H NMR spectra of compound **4j**.

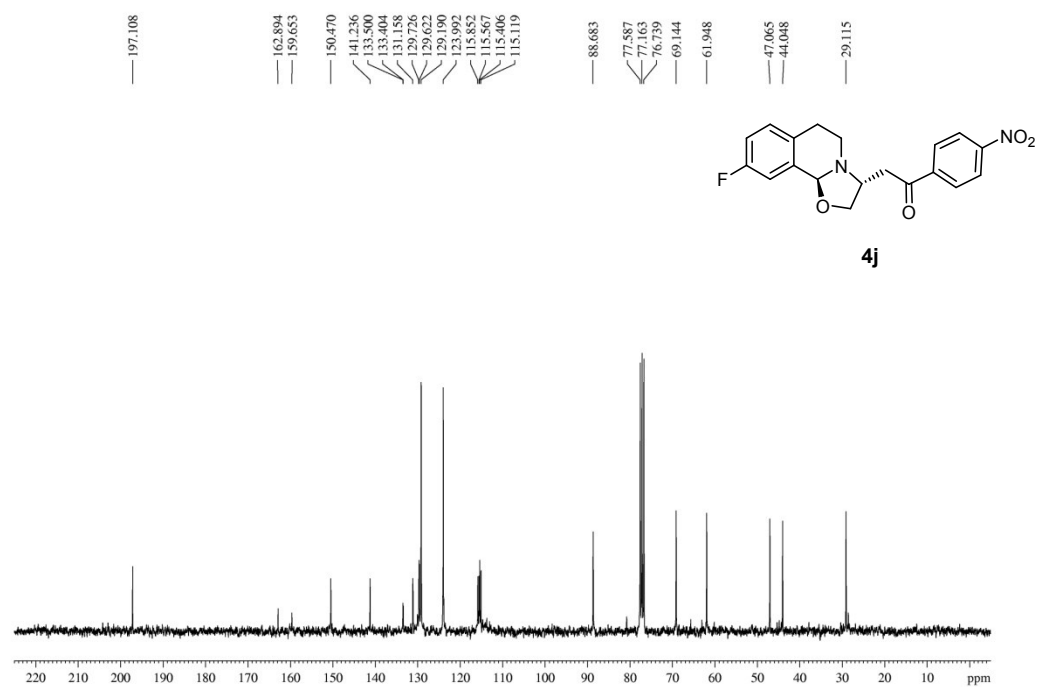

Figure S58: <sup>13</sup>C NMR spectra of compound **4j**.

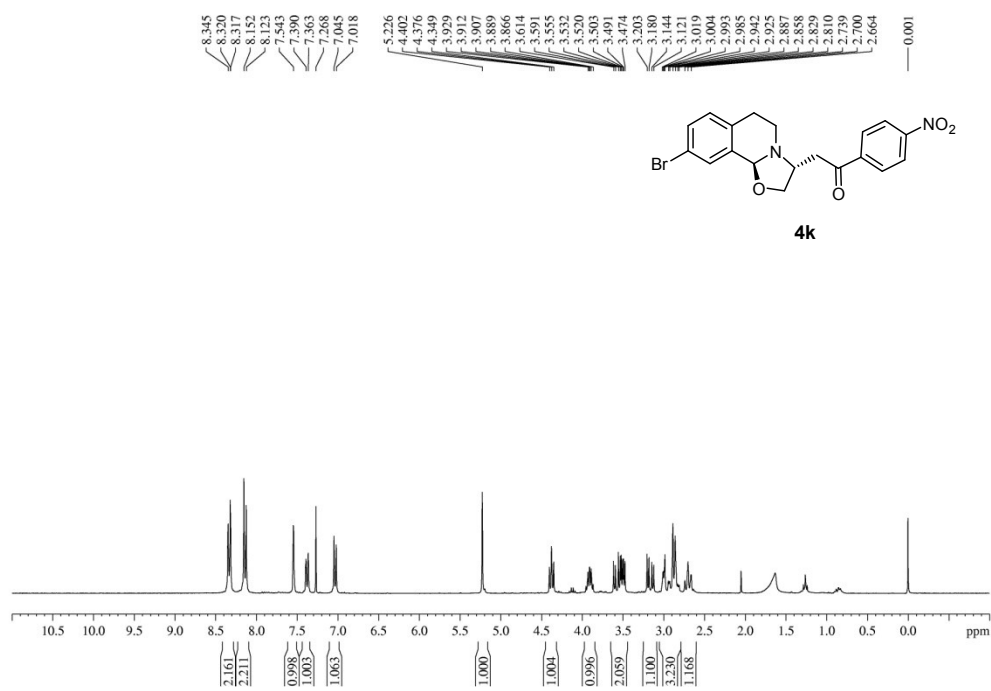

Figure S59:  $^1\text{H}$  NMR spectra of compound **4k**.

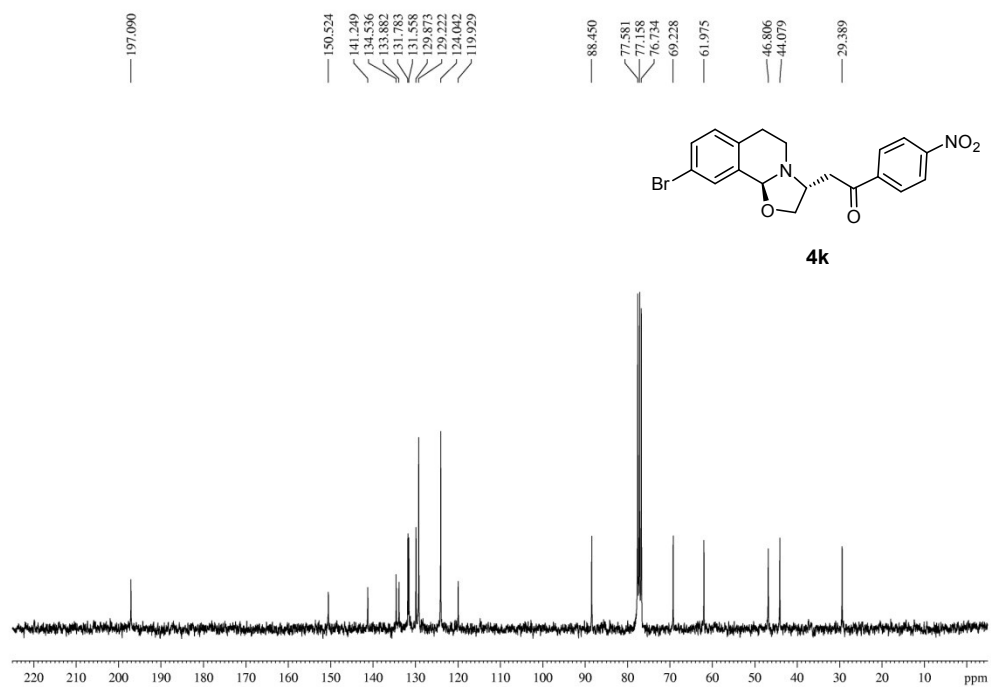

Figure S60:  $^{13}\text{C}$  NMR spectra of compound **4k**.

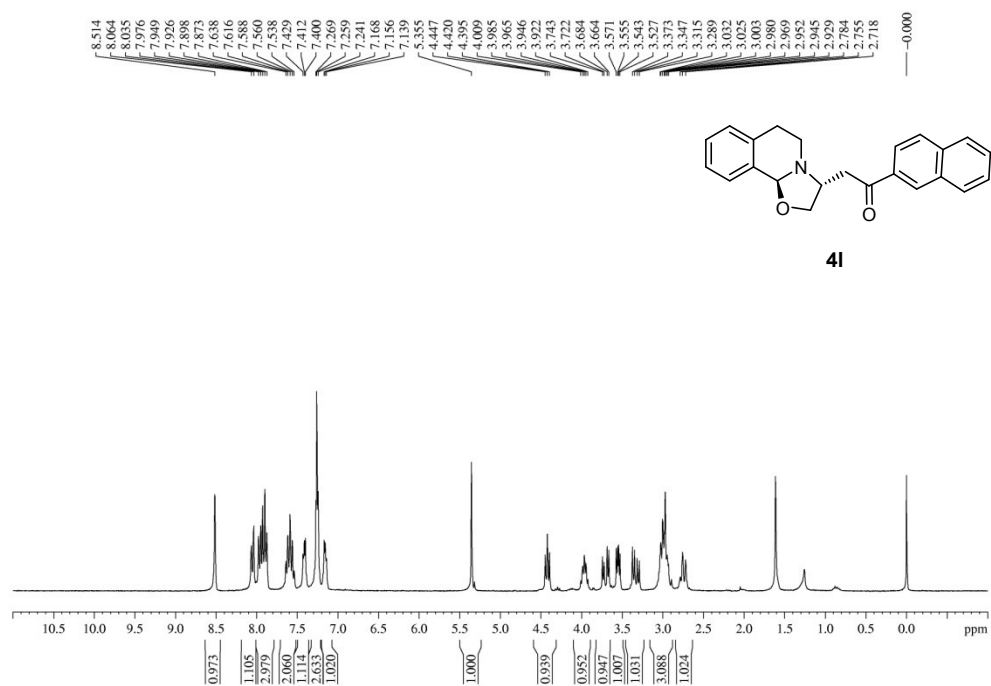

Figure S61: <sup>1</sup>H NMR spectra of compound 4l.

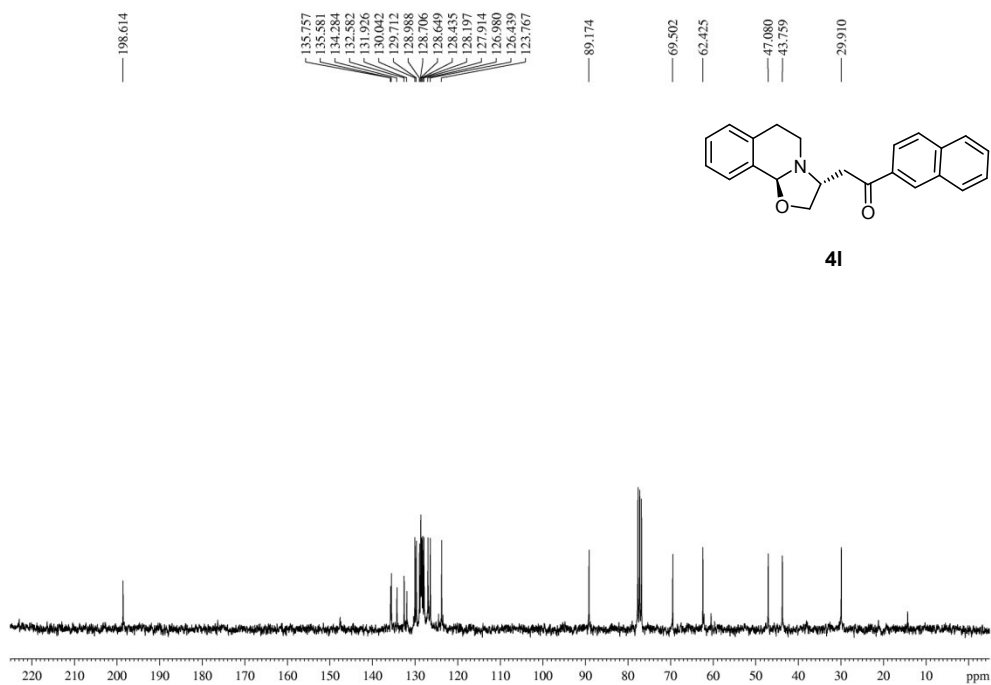

Figure S62: <sup>13</sup>C NMR spectra of compound 4l.

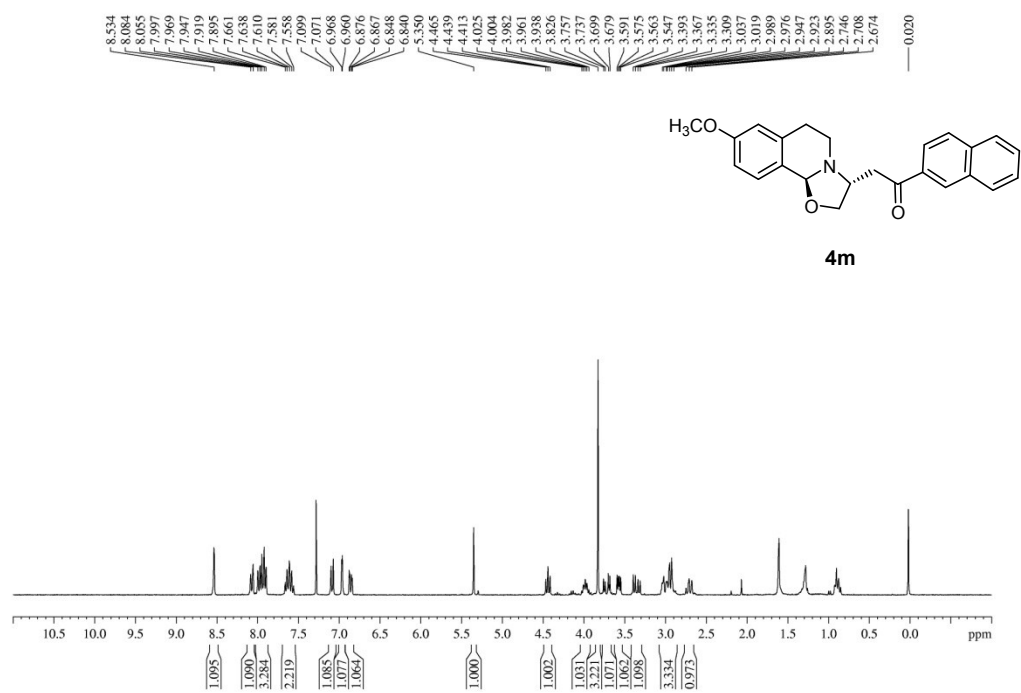

Figure S63: <sup>1</sup>H NMR spectra of compound **4m**.

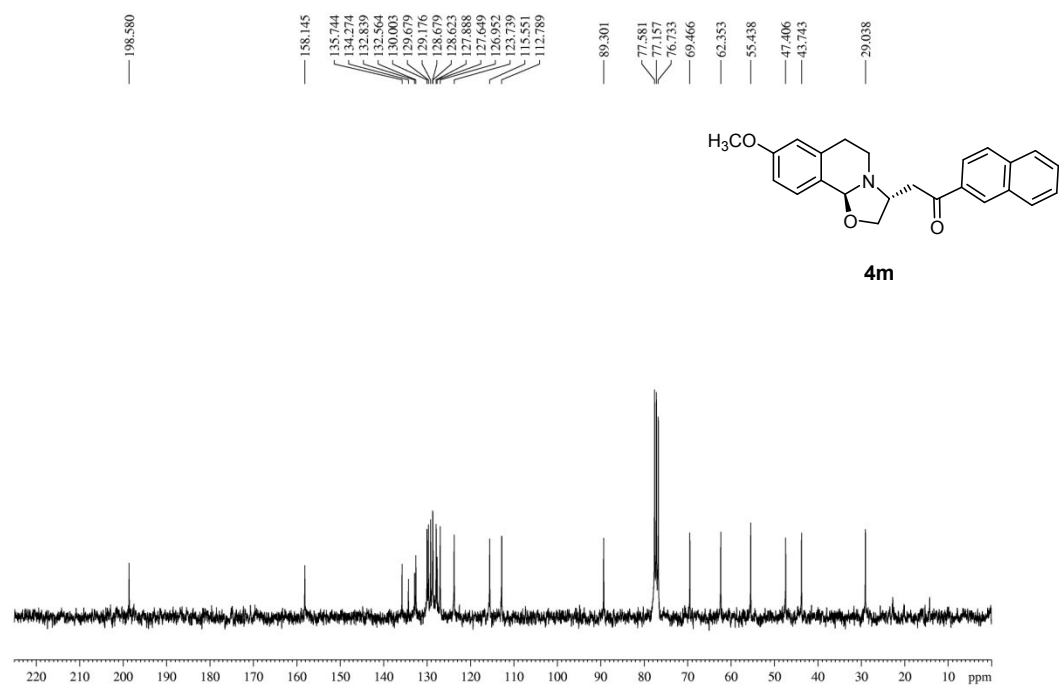

Figure S64: <sup>13</sup>C NMR spectra of compound **4m**.



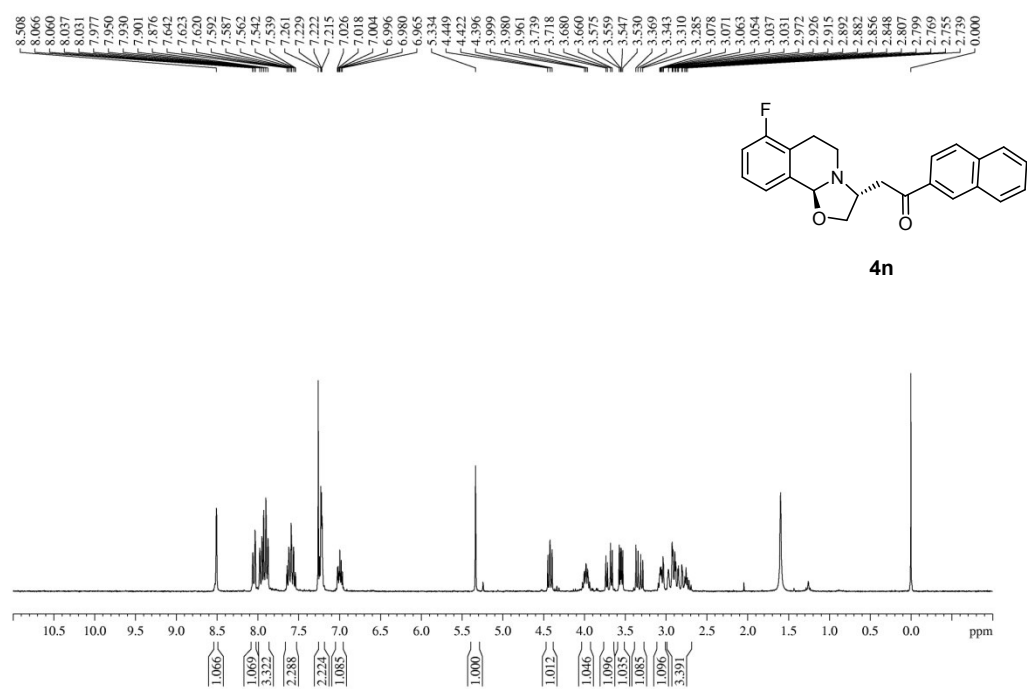

Figure S65: <sup>1</sup>H NMR spectra of compound 4n.

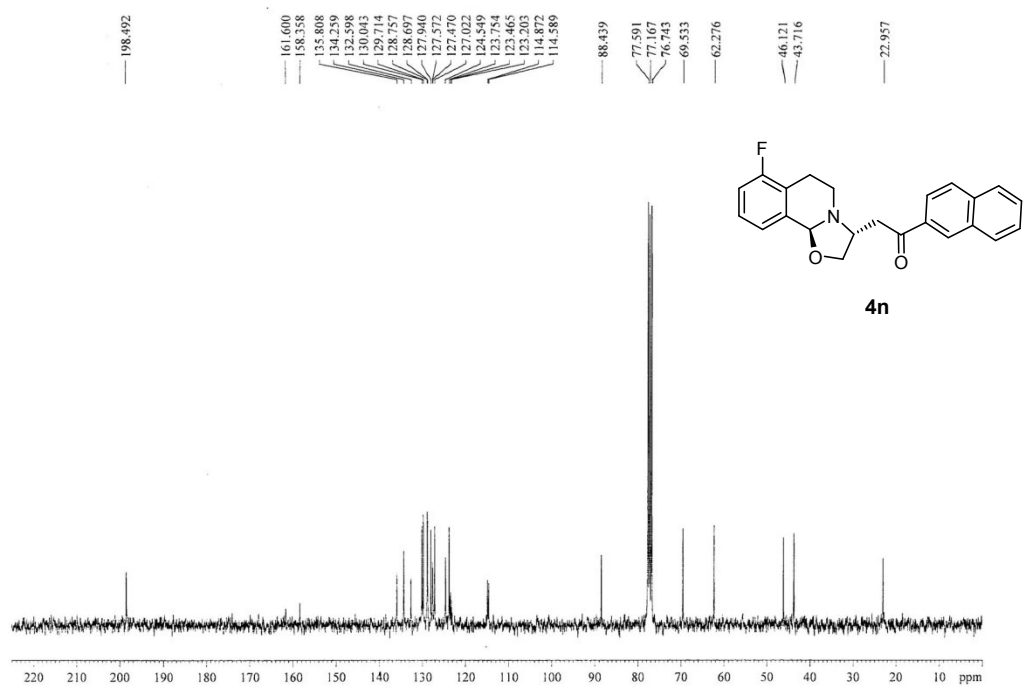

Figure S66: <sup>13</sup>C NMR spectra of compound 4n.

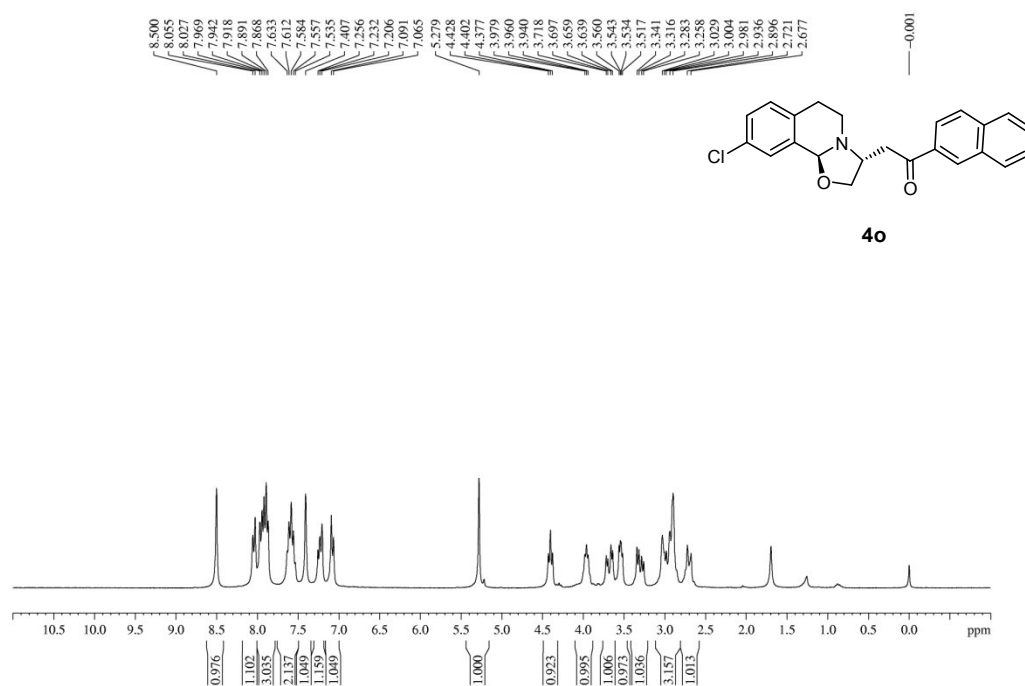

Figure S67: <sup>1</sup>H NMR spectra of compound **4o**.

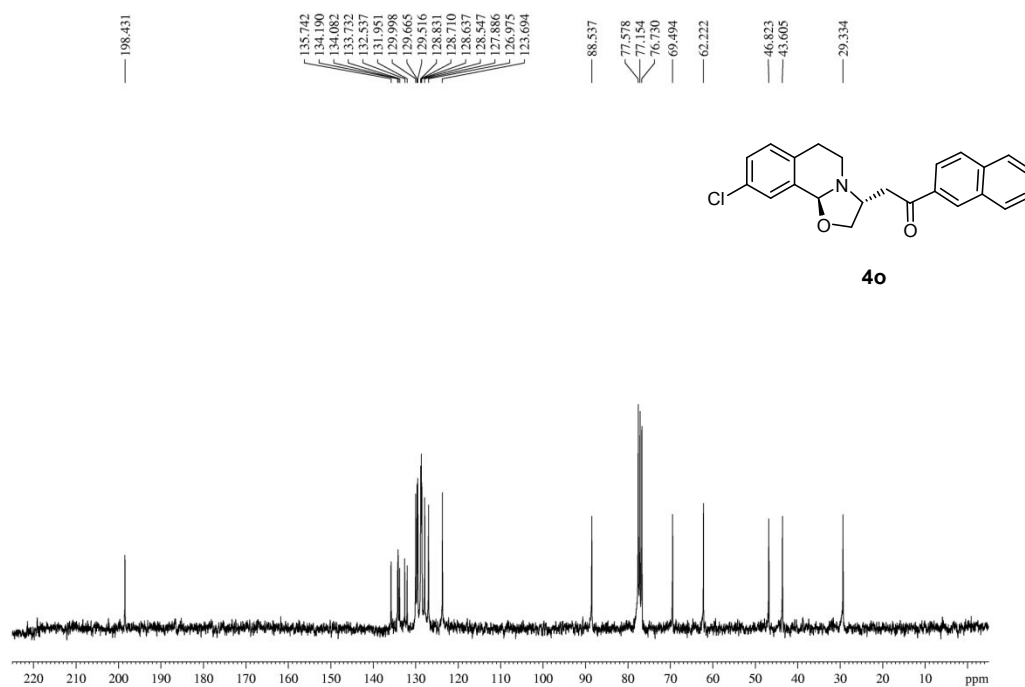

Figure S68: <sup>13</sup>C NMR spectra of compound **4o**.

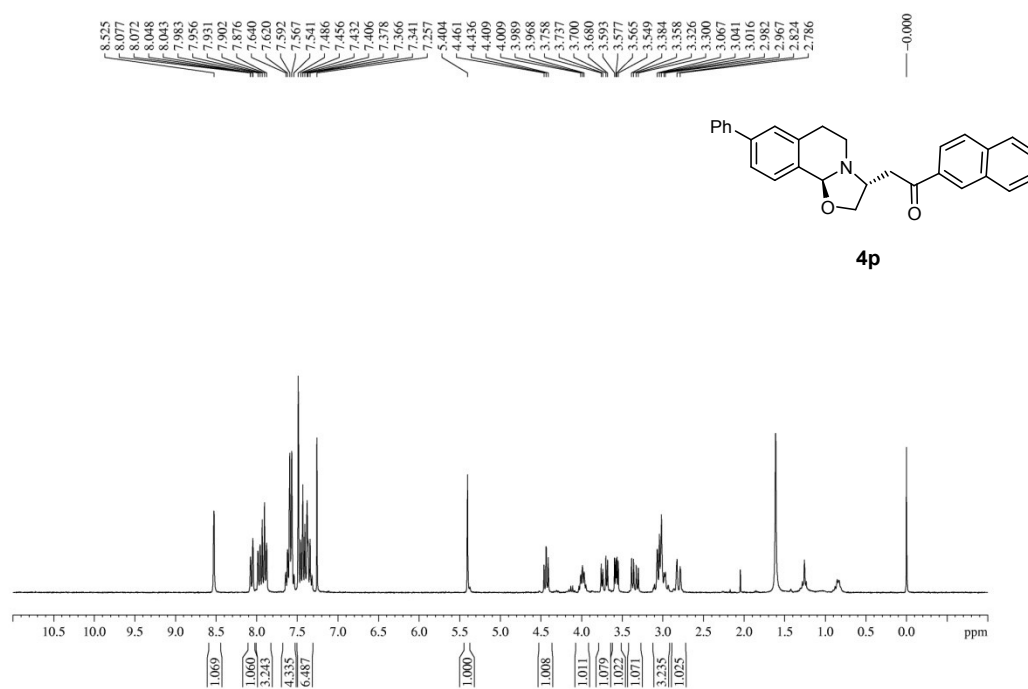

Figure S69: <sup>1</sup>H NMR spectra of compound 4p.

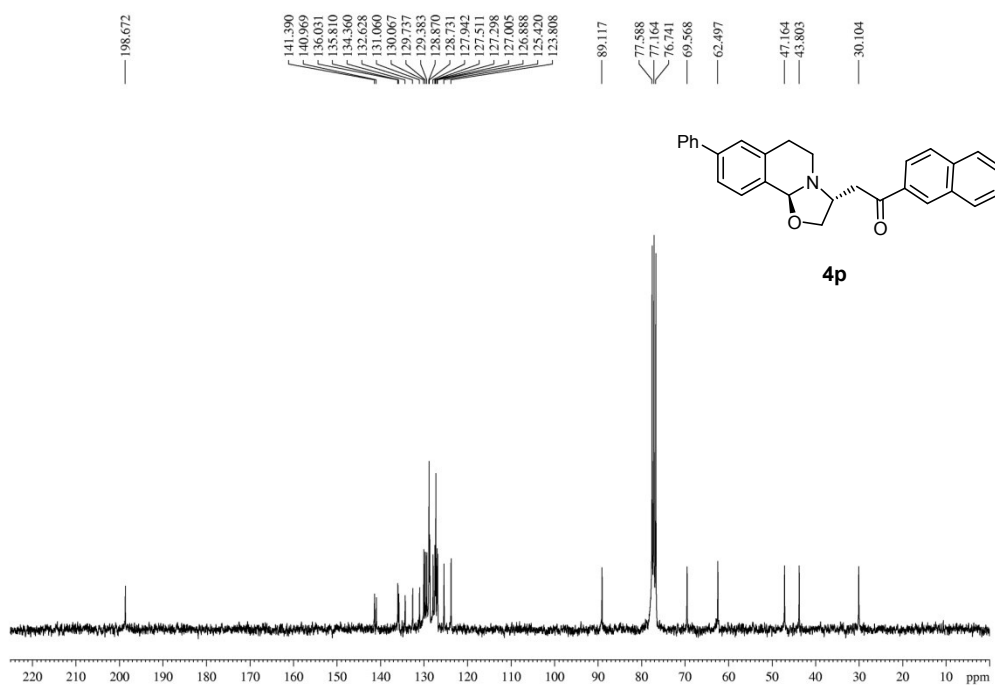

Figure S70: <sup>13</sup>C NMR spectra of compound 4p.

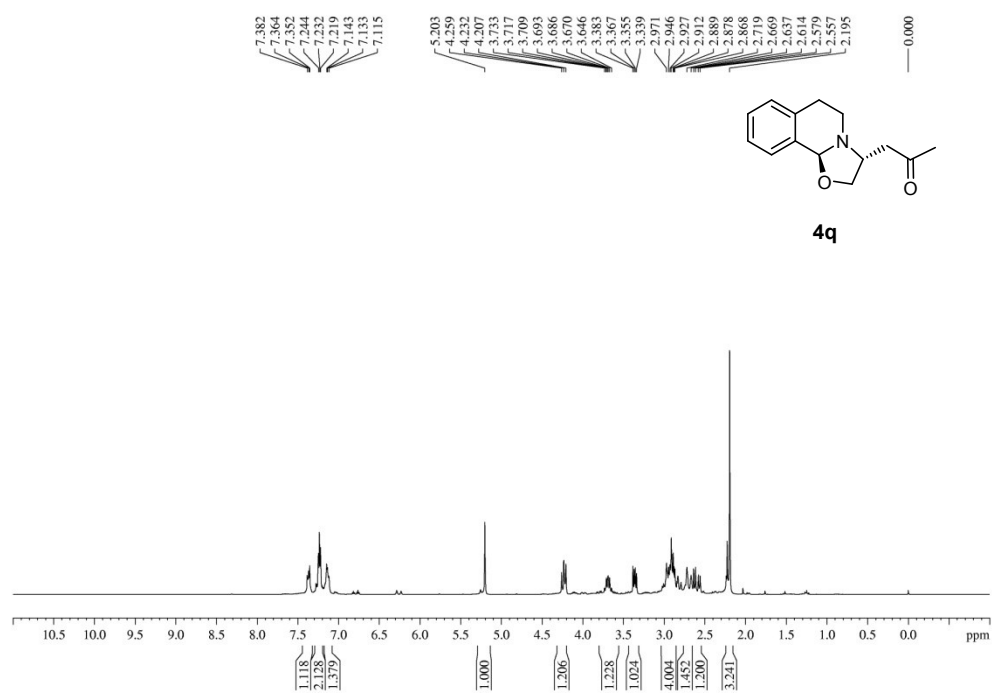

Figure S71:  $^{13}\text{C}$  NMR spectra of compound **4q**.

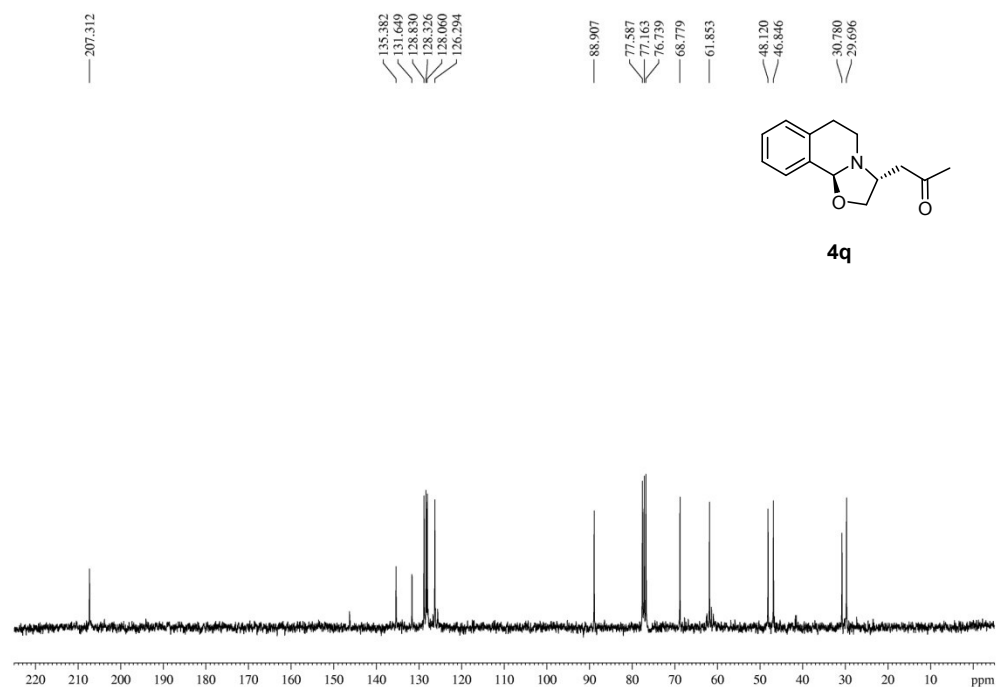

Figure S72:  $^{13}\text{C}$  NMR spectra of compound **4q**.

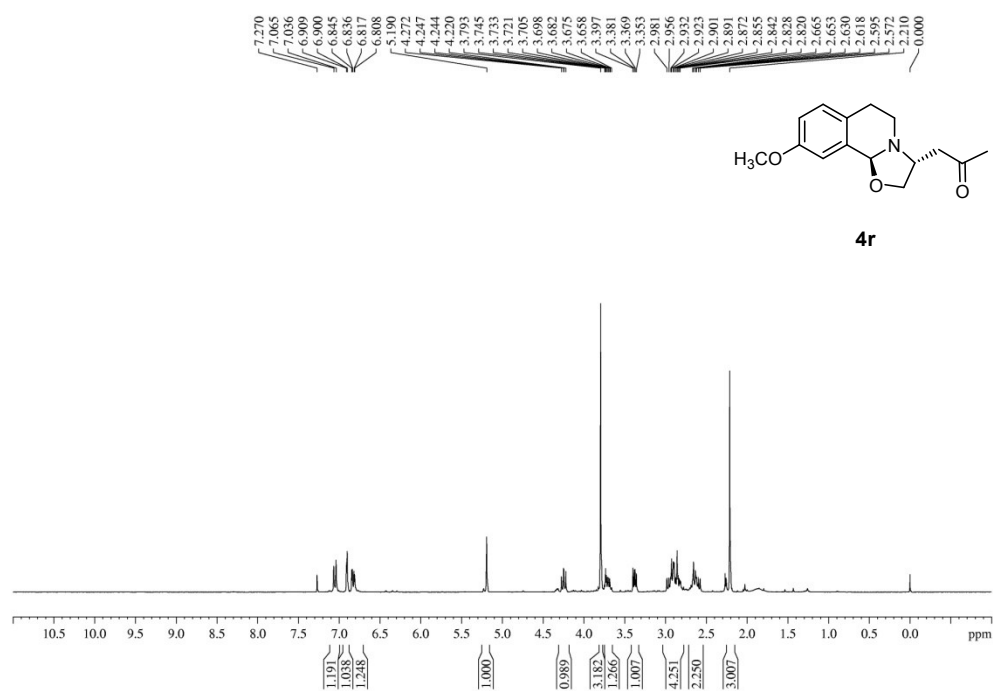

Figure S73: <sup>1</sup>H NMR spectra of compound **4r**.

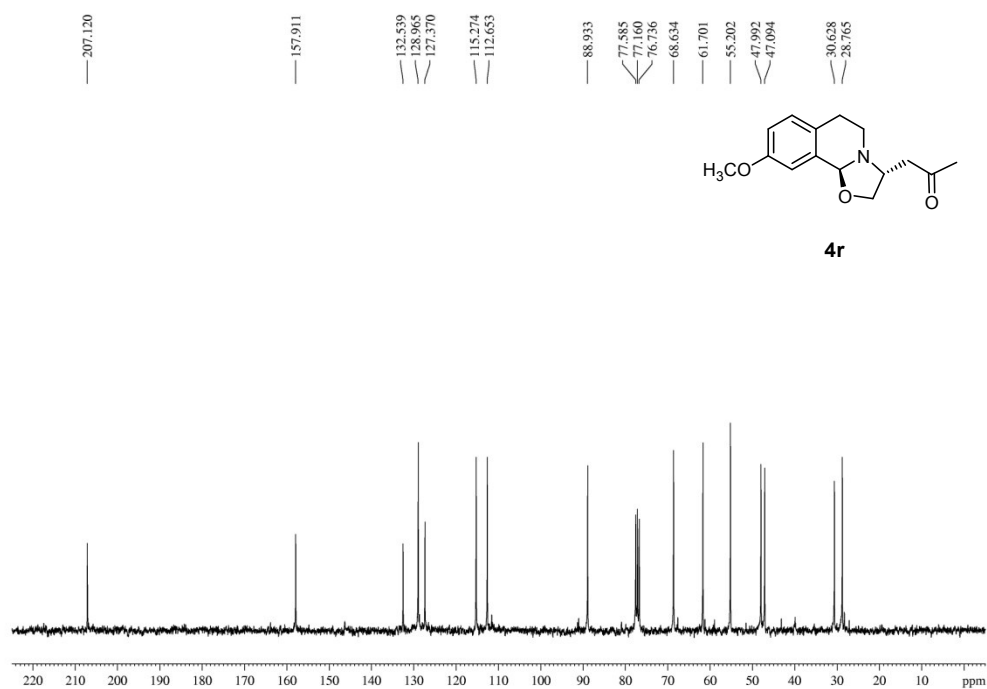

Figure S74: <sup>13</sup>C NMR spectra of compound **4r**.

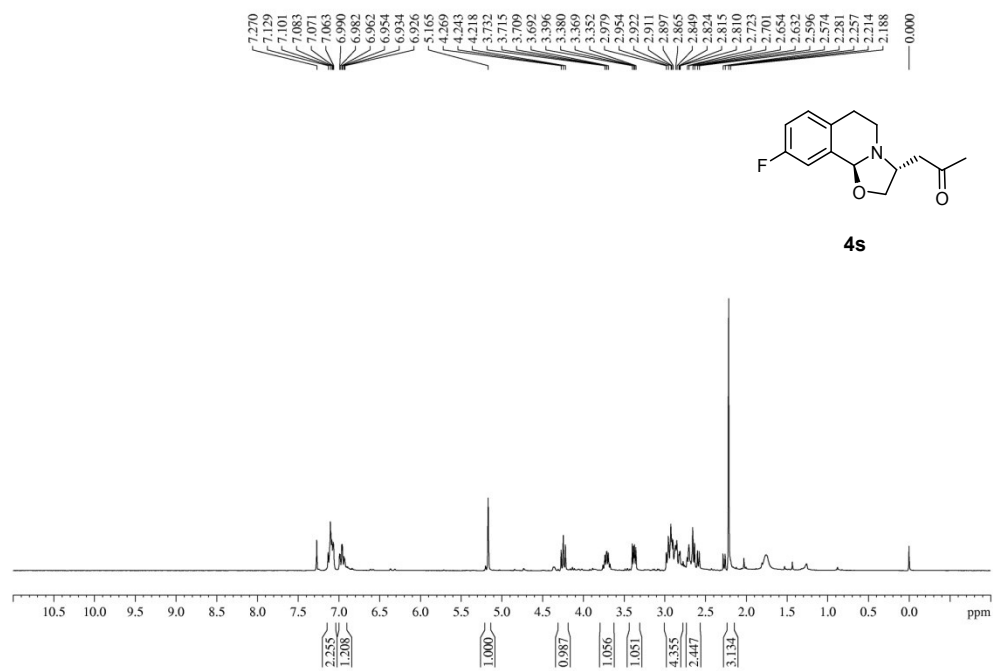

Figure S75: <sup>1</sup>H NMR spectra of compound **4s**.

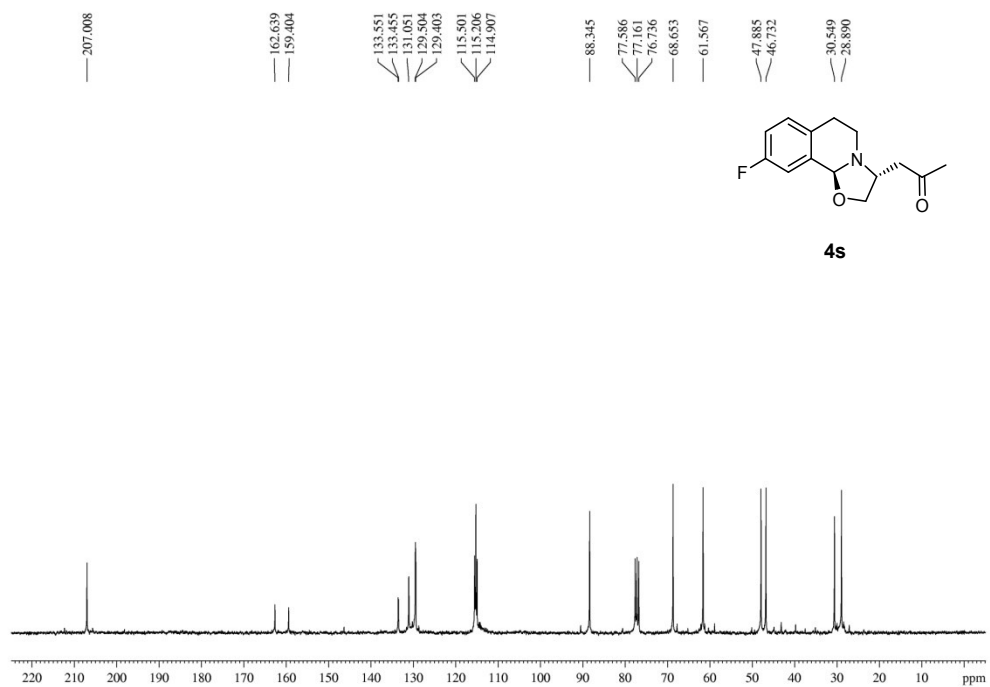

Figure S76: <sup>13</sup>C NMR spectra of compound **4s**.

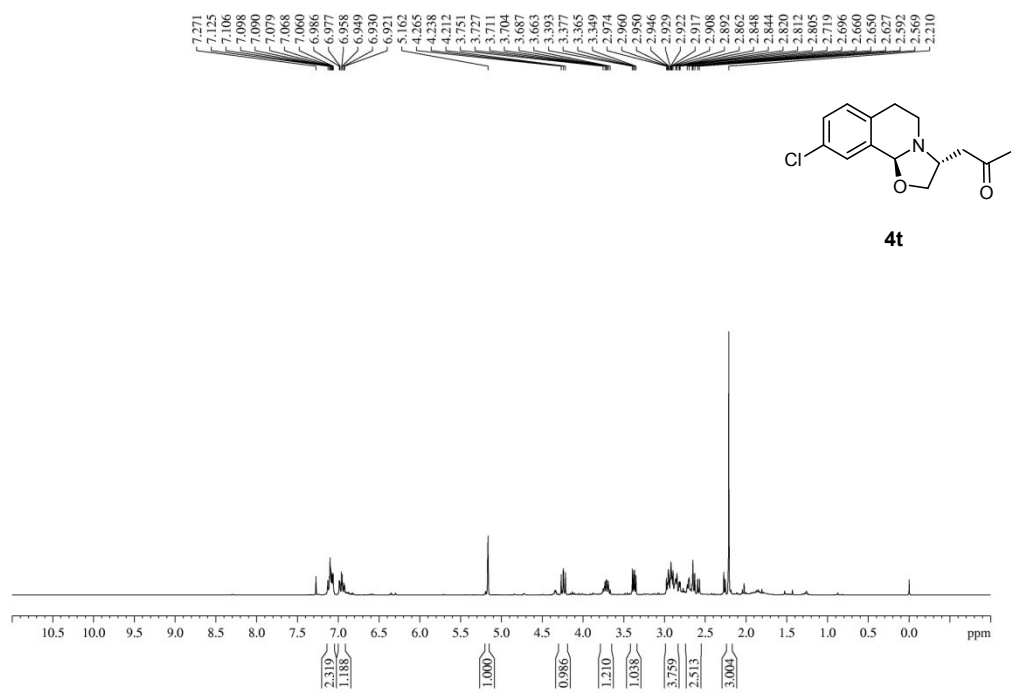

Figure S77:  $^1\text{H}$  NMR spectra of compound 4t.

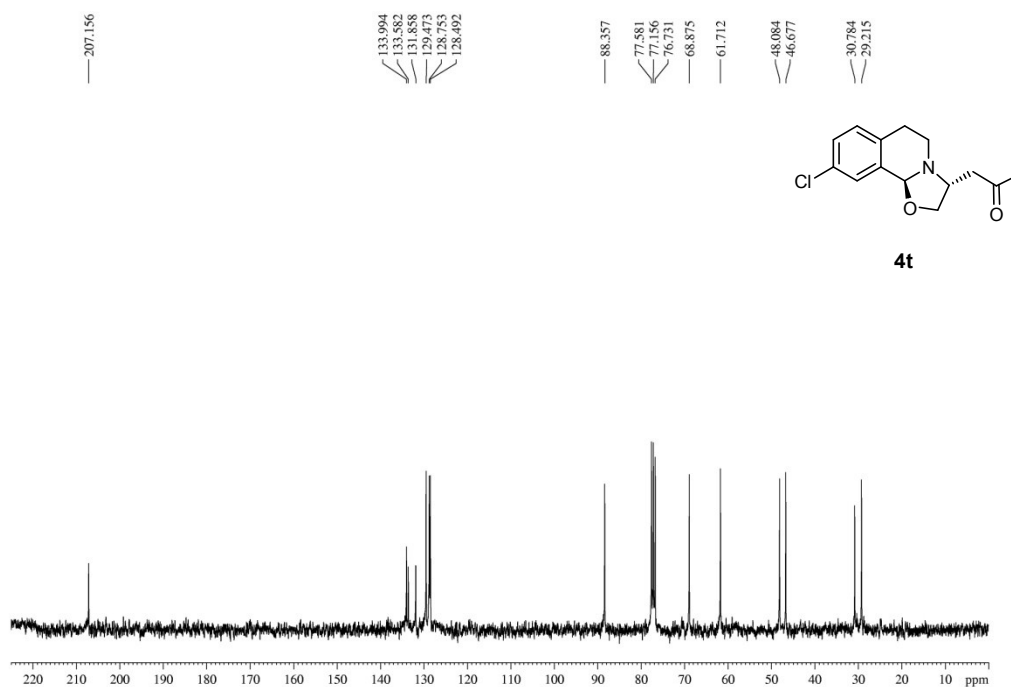

Figure S78:  $^{13}\text{C}$  NMR spectra of compound 4t.

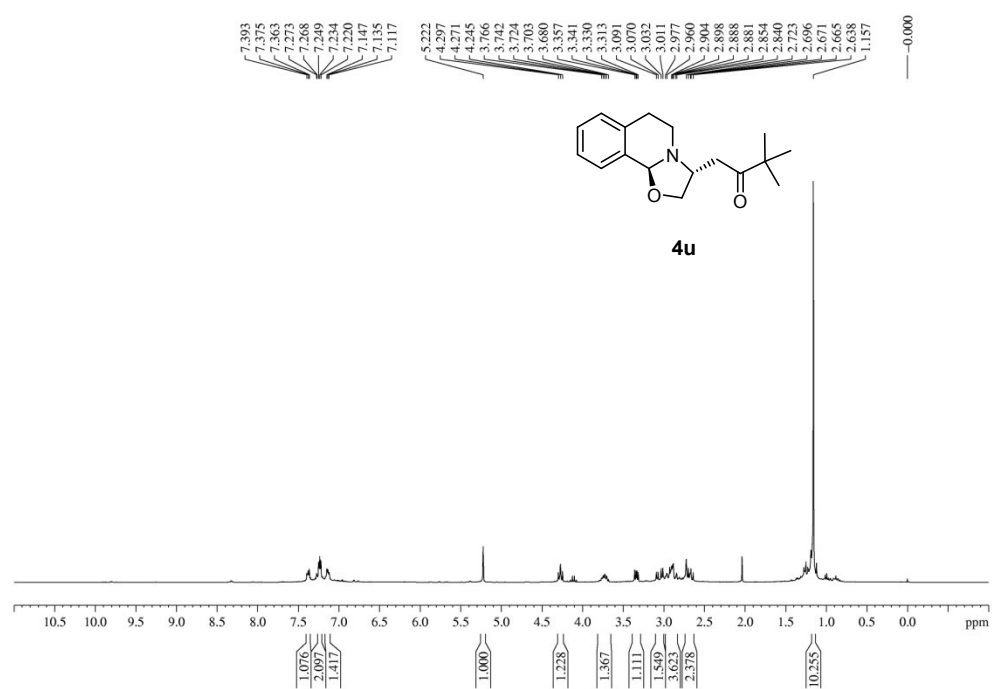

Figure S79:  $^1\text{H}$  NMR spectra of compound **4u**.

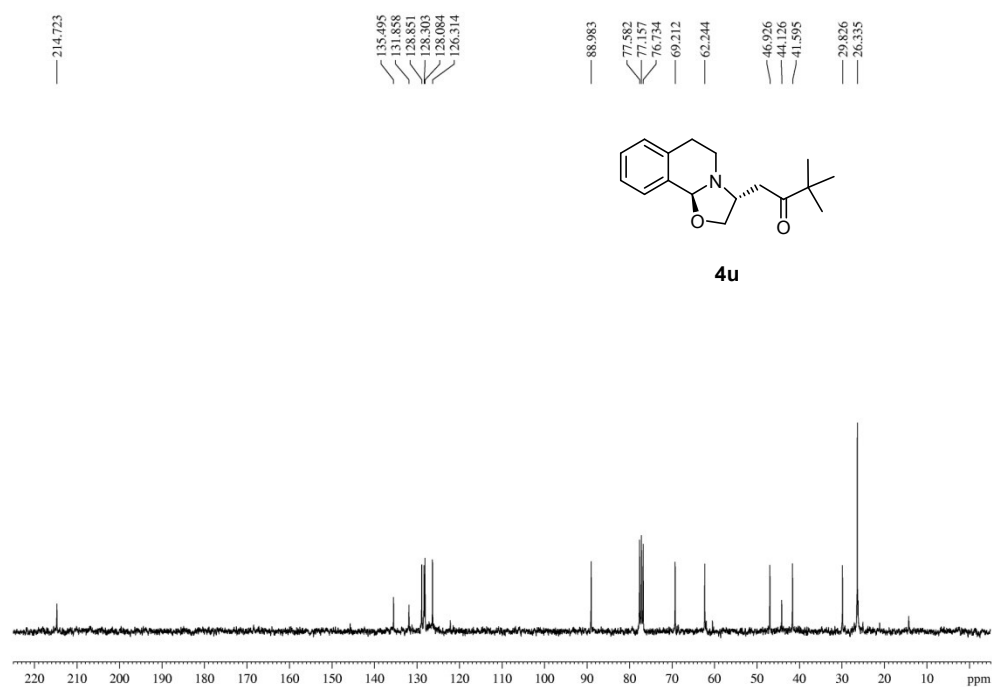

Figure S80:  $^{13}\text{C}$  NMR spectra of compound **4u**.



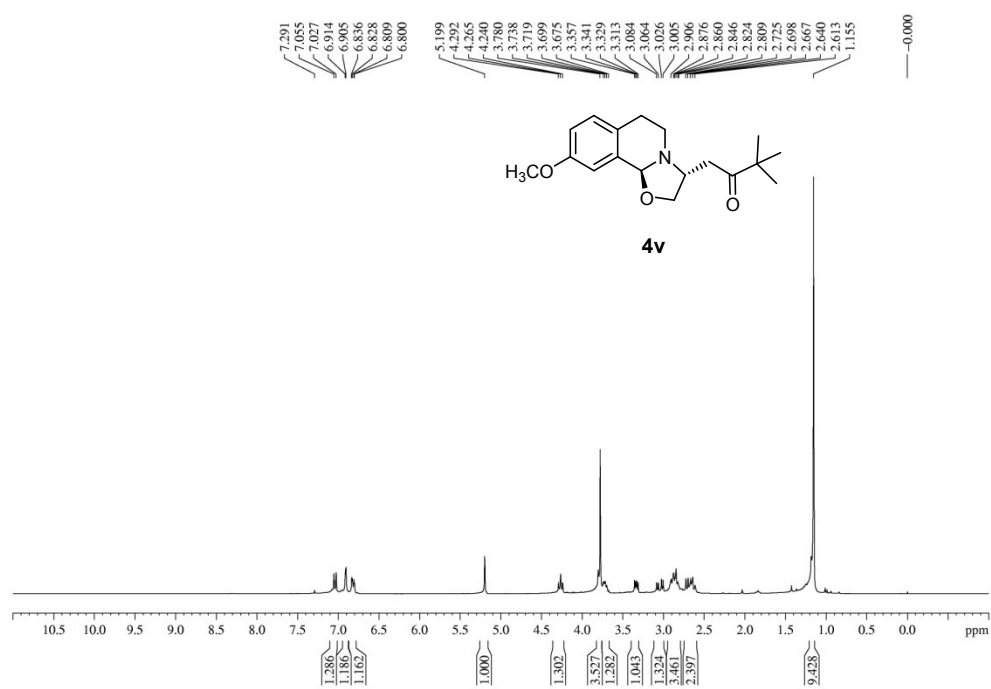

Figure S81: <sup>1</sup>H NMR spectra of compound **4v**.

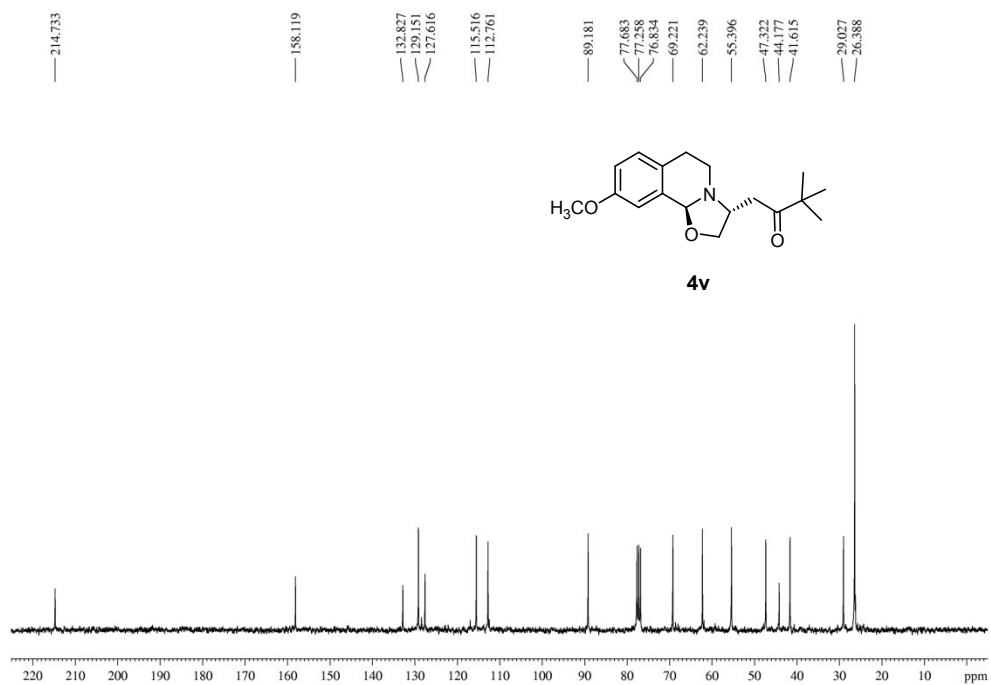

Figure S82: <sup>13</sup>C NMR spectra of compound **4v**.

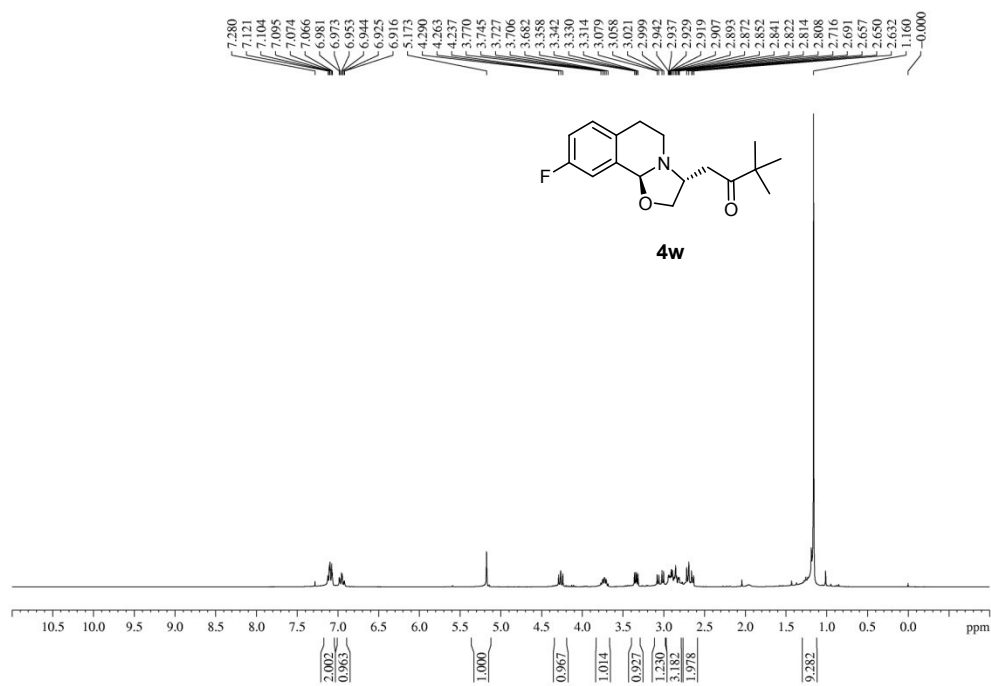

Figure S83:  $^1\text{H}$  NMR spectra of compound **4w**.

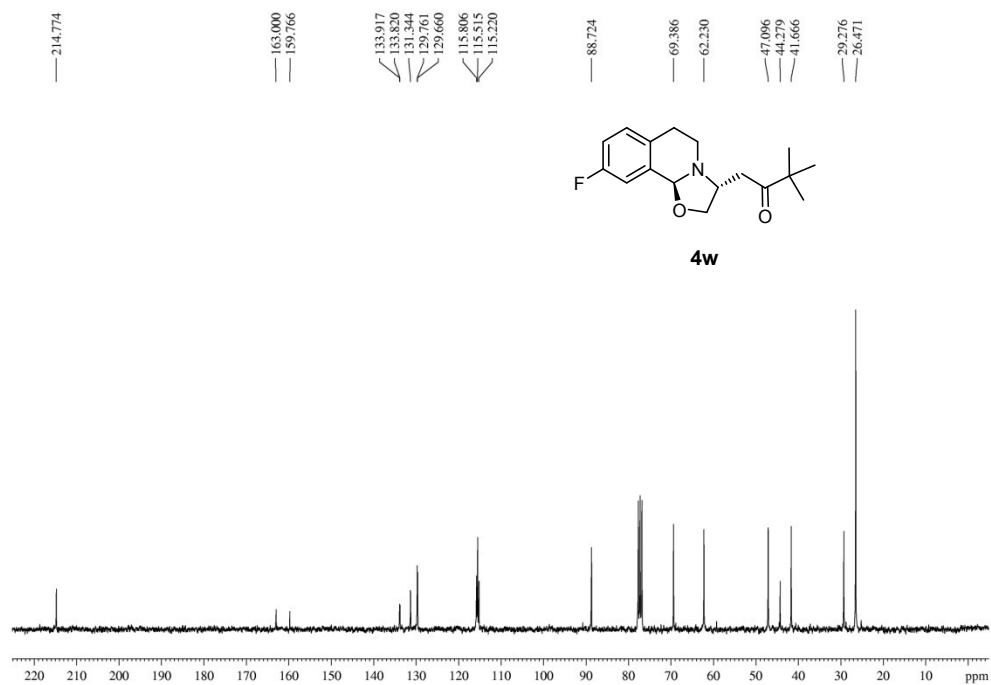

Figure S84:  $^{13}\text{C}$  NMR spectra of compound **4w**.

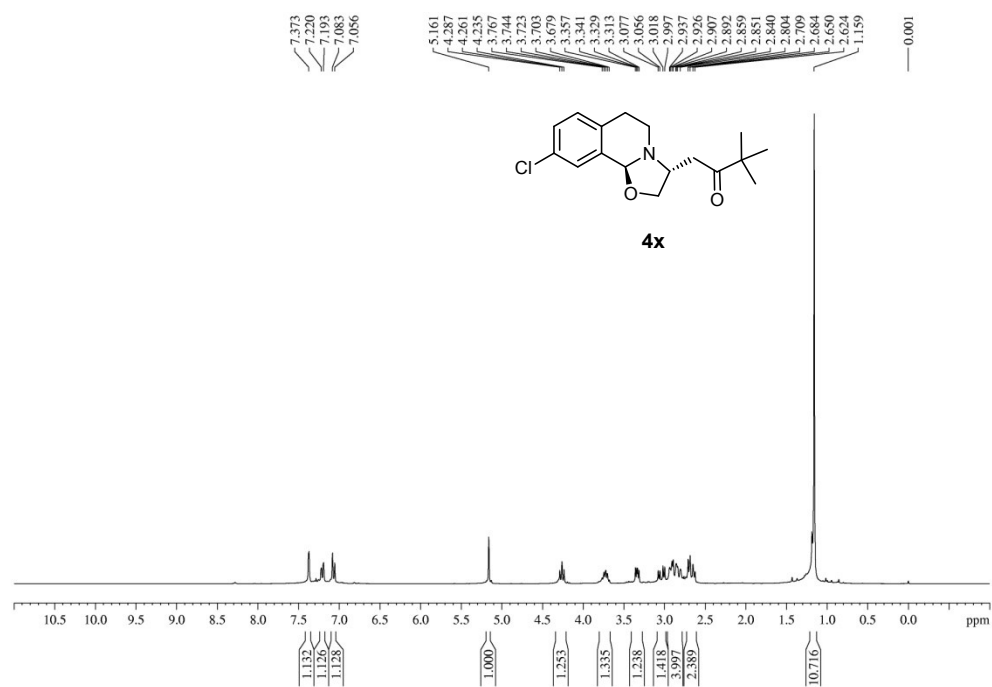

Figure S85:  $^1\text{H}$  NMR spectra of compound **4x**.

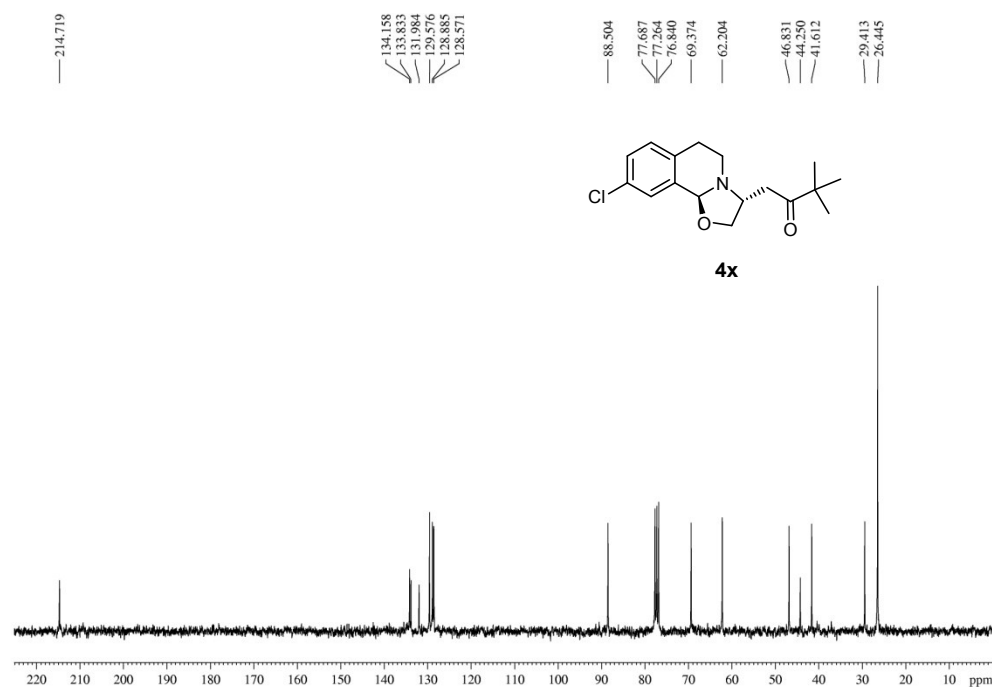

Figure S86:  $^{13}\text{C}$  NMR spectra of compound **4x**.

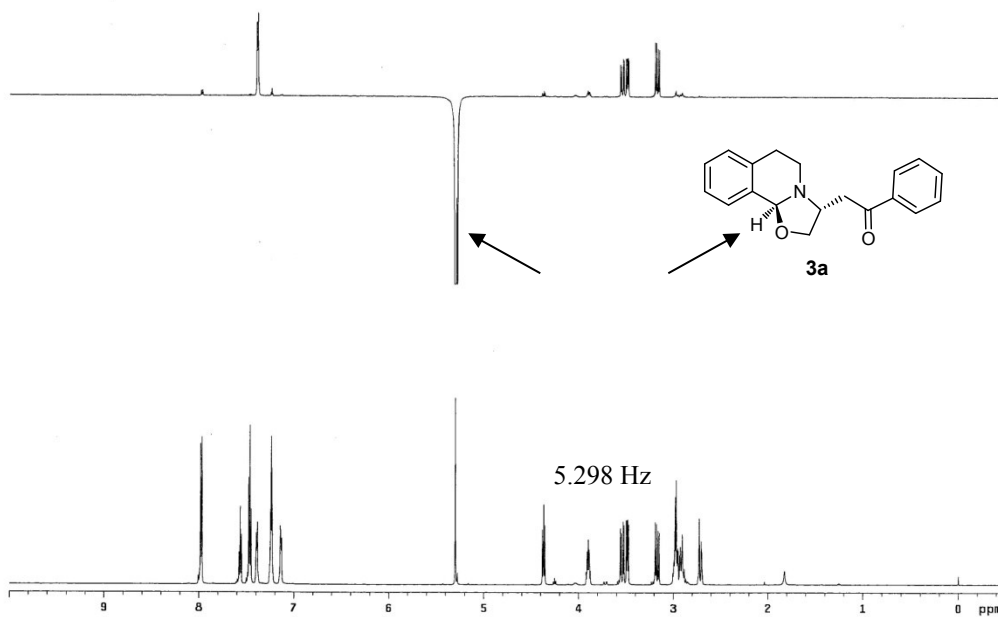

**Figure S87.** Selective 1D NOESY spectrum of **3a**.

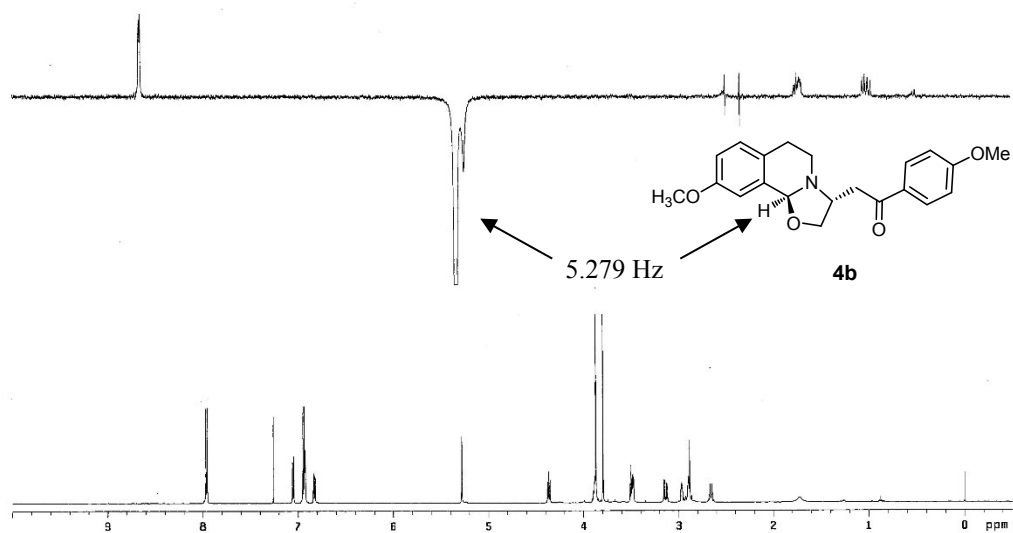

**Figure S88.** Selective 1D NOESY spectrum of **4b**.

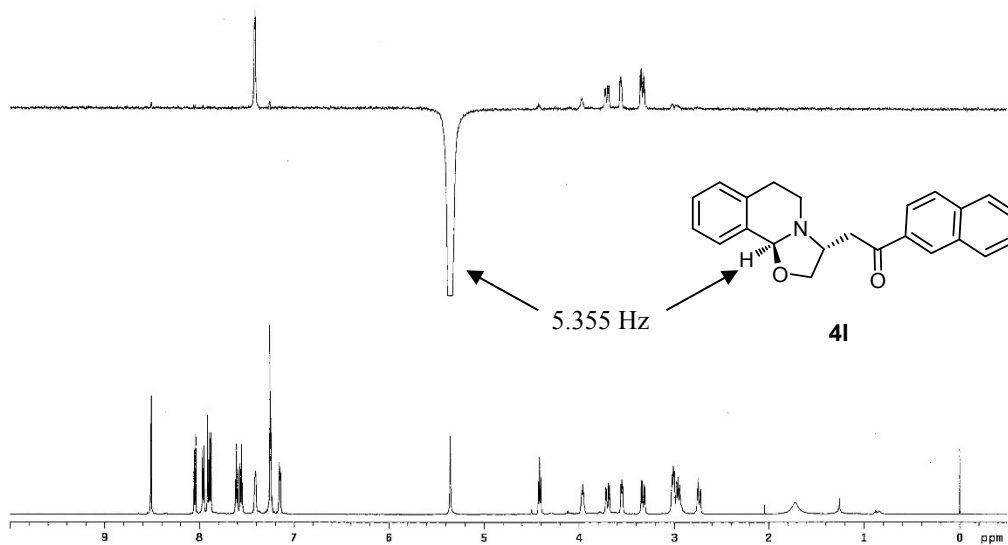

**Figure S89.** Selective 1D NOESY spectrum of **4l**.

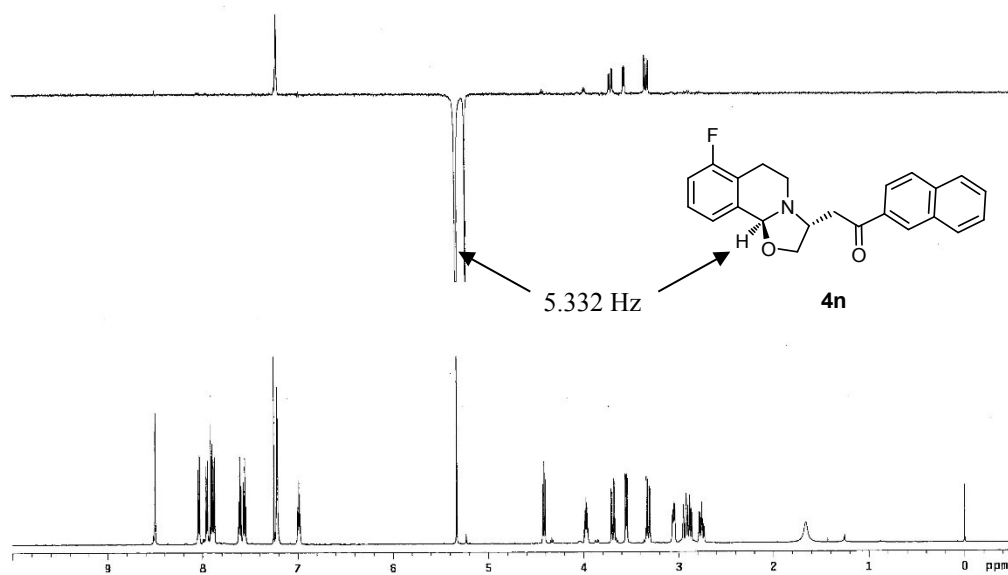

**Figure S90.** Selective 1D NOESY spectrum of **4n**.

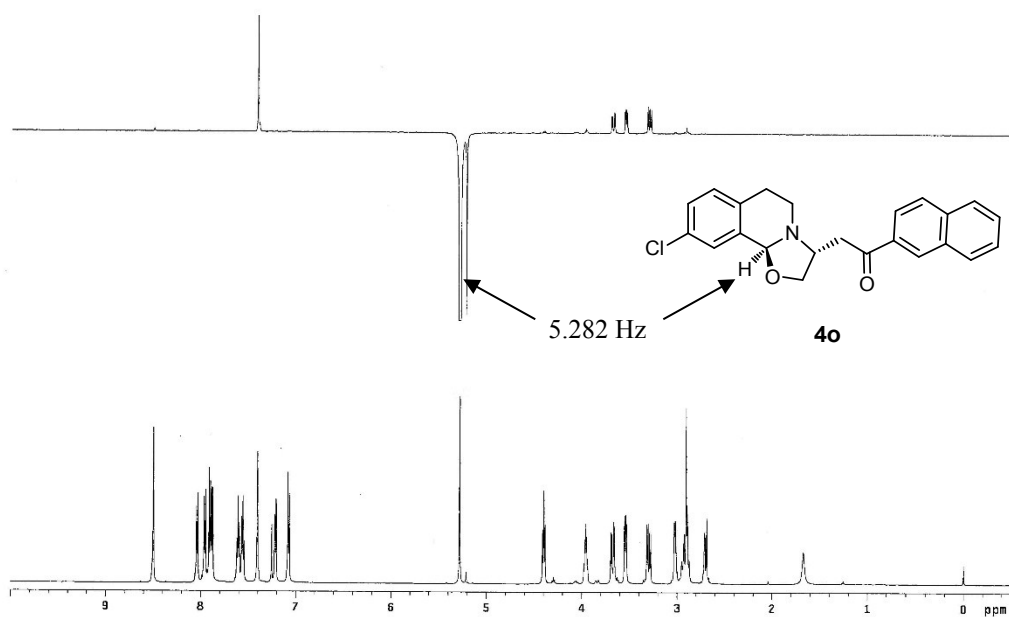

**Figure S91.** Selective 1D NOESY spectrum of **4o**.

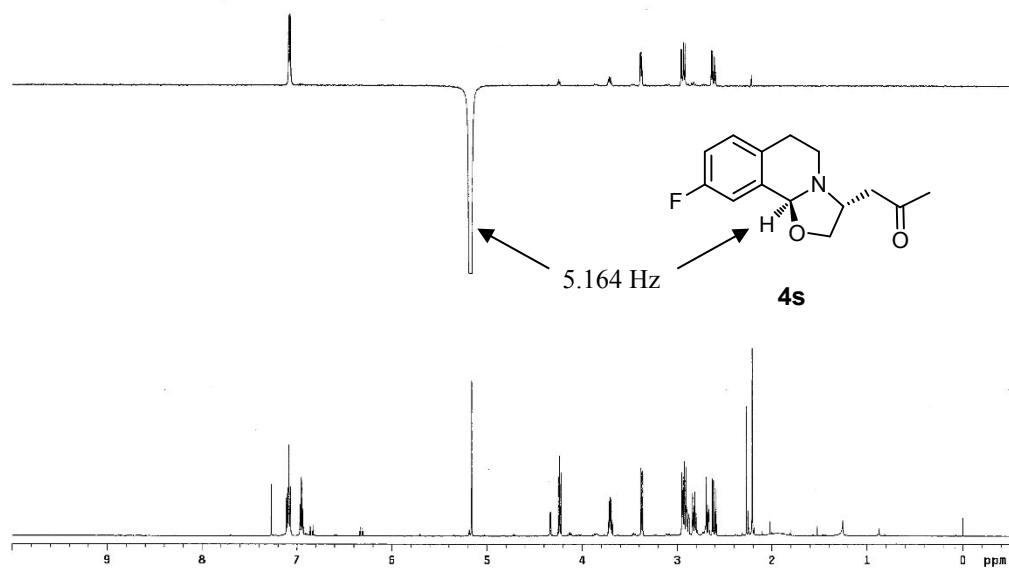

**Figure S92.** Selective 1D NOESY spectrum of **4s**.

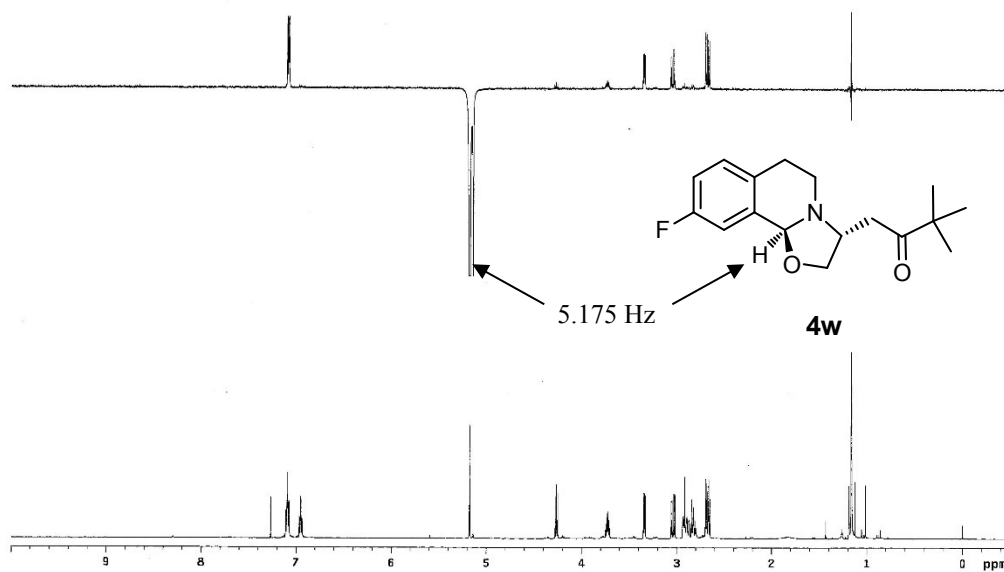

Figure S93. Selective 1D NOESY spectrum of **4w**.

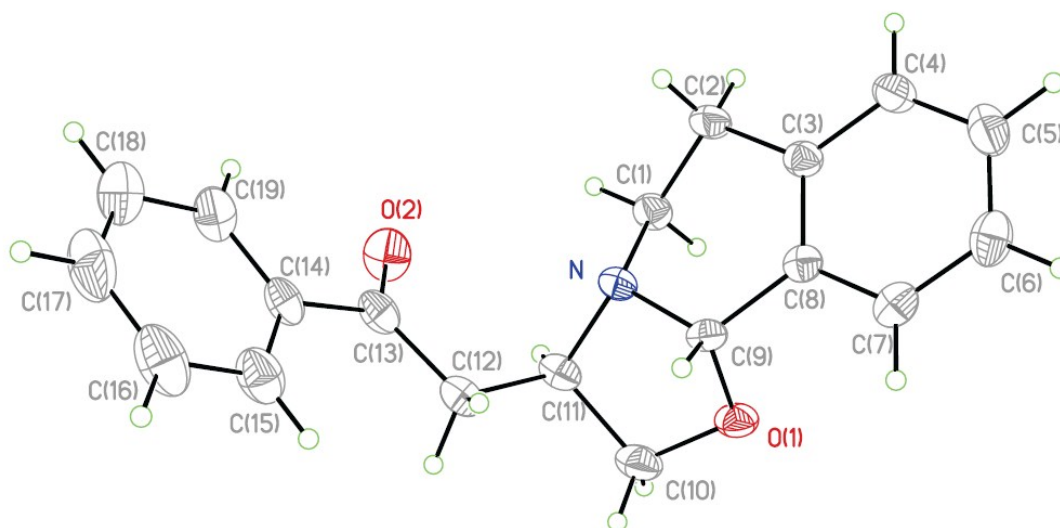

Figure S94. X-ray Crystallographic Data of compound **3a**.

Table 1. Crystal data and structure refinement for **3a**.

|                                   |                                                         |                                         |
|-----------------------------------|---------------------------------------------------------|-----------------------------------------|
| Identification code               | <b>3a</b>                                               |                                         |
| Empirical formula                 | C <sub>19</sub> H <sub>19</sub> N O <sub>2</sub>        |                                         |
| Formula weight                    | 293.35                                                  |                                         |
| Temperature                       | 150(2) K                                                |                                         |
| Wavelength                        | 0.71073 Å                                               |                                         |
| Crystal system                    | ?                                                       |                                         |
| Space group                       | ?                                                       |                                         |
| Unit cell dimensions              | a = 8.0476(5) Å<br>b = 8.1366(5) Å<br>c = 23.2624(14) Å | α = 90°.<br>β = 94.493(2)°.<br>γ = 90°. |
| Volume                            | 1518.54(16) Å <sup>3</sup>                              |                                         |
| Z                                 | 4                                                       |                                         |
| Density (calculated)              | 1.283 Mg/m <sup>3</sup>                                 |                                         |
| Absorption coefficient            | 0.083 mm <sup>-1</sup>                                  |                                         |
| F(000)                            | 624                                                     |                                         |
| Crystal size                      | 0.52 x 0.47 x 0.44 mm <sup>3</sup>                      |                                         |
| Theta range for data collection   | 3.06 to 26.39°.                                         |                                         |
| Index ranges                      | -10 ≤ h ≤ 10, -10 ≤ k ≤ 10, -29 ≤ l ≤ 29                |                                         |
| Reflections collected             | 38076                                                   |                                         |
| Independent reflections           | 3106 [R(int) = 0.0286]                                  |                                         |
| Completeness to theta = 26.39°    | 99.8 %                                                  |                                         |
| Max. and min. transmission        | 0.9644 and 0.9581                                       |                                         |
| Refinement method                 | Full-matrix least-squares on F <sup>2</sup>             |                                         |
| Data / restraints / parameters    | 3106 / 0 / 199                                          |                                         |
| Goodness-of-fit on F <sup>2</sup> | 1.044                                                   |                                         |
| Final R indices [I > 2σ(I)]       | R1 = 0.0420, wR2 = 0.1093                               |                                         |
| R indices (all data)              | R1 = 0.0496, wR2 = 0.1178                               |                                         |
| Largest diff. peak and hole       | 0.214 and -0.287 e.Å <sup>-3</sup>                      |                                         |



Table 2. Atomic coordinates ( $\times 10^4$ ) and equivalent isotropic displacement parameters ( $\text{\AA}^2 \times 10^3$ ) for **3a**.  $U(\text{eq})$  is defined as one third of the trace of the orthogonalized  $U^{ij}$  tensor.

|       | x        | y       | z       | $U(\text{eq})$ |
|-------|----------|---------|---------|----------------|
| O(1)  | 10301(1) | 7651(1) | 2488(1) | 28(1)          |
| O(2)  | 8110(2)  | 7033(1) | 396(1)  | 40(1)          |
| N     | 8189(1)  | 7388(1) | 1756(1) | 22(1)          |
| C(1)  | 7471(2)  | 9053(2) | 1709(1) | 26(1)          |
| C(2)  | 5852(2)  | 9063(2) | 1999(1) | 30(1)          |
| C(3)  | 6119(2)  | 8485(2) | 2614(1) | 24(1)          |
| C(4)  | 5036(2)  | 8932(2) | 3029(1) | 31(1)          |
| C(5)  | 5326(2)  | 8426(2) | 3596(1) | 35(1)          |
| C(6)  | 6703(2)  | 7458(2) | 3760(1) | 34(1)          |
| C(7)  | 7761(2)  | 6977(2) | 3351(1) | 28(1)          |
| C(8)  | 7485(2)  | 7489(1) | 2779(1) | 22(1)          |
| C(9)  | 8667(1)  | 6937(2) | 2350(1) | 22(1)          |
| C(10) | 11153(2) | 7306(2) | 1985(1) | 33(1)          |
| C(11) | 9778(2)  | 7243(2) | 1476(1) | 27(1)          |
| C(12) | 9779(2)  | 5648(2) | 1136(1) | 30(1)          |
| C(13) | 8602(2)  | 5718(2) | 595(1)  | 28(1)          |
| C(14) | 8037(2)  | 4154(2) | 305(1)  | 28(1)          |
| C(15) | 8648(2)  | 2617(2) | 478(1)  | 39(1)          |
| C(16) | 8036(3)  | 1208(2) | 199(1)  | 51(1)          |
| C(17) | 6800(2)  | 1328(2) | -246(1) | 54(1)          |
| C(18) | 6189(3)  | 2842(2) | -427(1) | 52(1)          |
| C(19) | 6814(2)  | 4246(2) | -153(1) | 39(1)          |

Table 3. Bond lengths [ $\text{\AA}$ ] and angles [ $^\circ$ ] for **3a**.

---

|              |            |
|--------------|------------|
| O(1)-C(10)   | 1.4305(17) |
| O(1)-C(9)    | 1.4506(14) |
| O(2)-C(13)   | 1.2190(17) |
| N-C(9)       | 1.4520(16) |
| N-C(1)       | 1.4736(15) |
| N-C(11)      | 1.4841(15) |
| C(1)-C(2)    | 1.5135(18) |
| C(1)-H(1A)   | 0.9900     |
| C(1)-H(1B)   | 0.9900     |
| C(2)-C(3)    | 1.5057(18) |
| C(2)-H(2A)   | 0.9900     |
| C(2)-H(2B)   | 0.9900     |
| C(3)-C(4)    | 1.3987(18) |
| C(3)-C(8)    | 1.3951(17) |
| C(4)-C(5)    | 1.383(2)   |
| C(4)-H(4A)   | 0.9500     |
| C(5)-C(6)    | 1.389(2)   |
| C(5)-H(5A)   | 0.9500     |
| C(6)-C(7)    | 1.381(2)   |
| C(6)-H(6A)   | 0.9500     |
| C(7)-C(8)    | 1.3958(18) |
| C(7)-H(7A)   | 0.9500     |
| C(8)-C(9)    | 1.5016(17) |
| C(9)-H(9A)   | 1.0000     |
| C(10)-C(11)  | 1.5557(19) |
| C(10)-H(10A) | 0.9900     |
| C(10)-H(10B) | 0.9900     |
| C(11)-C(12)  | 1.5202(18) |
| C(11)-H(11A) | 1.0000     |
| C(12)-C(13)  | 1.515(2)   |
| C(12)-H(12A) | 0.9900     |
| C(12)-H(12B) | 0.9900     |
| C(13)-C(14)  | 1.4951(19) |
| C(14)-C(15)  | 1.391(2)   |
| C(14)-C(19)  | 1.394(2)   |
| C(15)-C(16)  | 1.389(2)   |

|                  |            |
|------------------|------------|
| C(15)-H(15A)     | 0.9500     |
| C(16)-C(17)      | 1.382(3)   |
| C(16)-H(16A)     | 0.9500     |
| C(17)-C(18)      | 1.380(3)   |
| C(17)-H(17A)     | 0.9500     |
| C(18)-C(19)      | 1.384(2)   |
| C(18)-H(18A)     | 0.9500     |
| C(19)-H(19A)     | 0.9500     |
|                  |            |
| C(10)-O(1)-C(9)  | 102.91(9)  |
| C(9)-N-C(1)      | 112.09(10) |
| C(9)-N-C(11)     | 102.91(9)  |
| C(1)-N-C(11)     | 112.80(10) |
| N-C(1)-C(2)      | 108.56(10) |
| N-C(1)-H(1A)     | 110.0      |
| C(2)-C(1)-H(1A)  | 110.0      |
| N-C(1)-H(1B)     | 110.0      |
| C(2)-C(1)-H(1B)  | 110.0      |
| H(1A)-C(1)-H(1B) | 108.4      |
| C(3)-C(2)-C(1)   | 110.99(10) |
| C(3)-C(2)-H(2A)  | 109.4      |
| C(1)-C(2)-H(2A)  | 109.4      |
| C(3)-C(2)-H(2B)  | 109.4      |
| C(1)-C(2)-H(2B)  | 109.4      |
| H(2A)-C(2)-H(2B) | 108.0      |
| C(4)-C(3)-C(8)   | 118.74(12) |
| C(4)-C(3)-C(2)   | 121.65(11) |
| C(8)-C(3)-C(2)   | 119.61(11) |
| C(5)-C(4)-C(3)   | 120.87(13) |
| C(5)-C(4)-H(4A)  | 119.6      |
| C(3)-C(4)-H(4A)  | 119.6      |
| C(4)-C(5)-C(6)   | 120.12(13) |
| C(4)-C(5)-H(5A)  | 119.9      |
| C(6)-C(5)-H(5A)  | 119.9      |
| C(7)-C(6)-C(5)   | 119.59(13) |
| C(7)-C(6)-H(6A)  | 120.2      |
| C(5)-C(6)-H(6A)  | 120.2      |
| C(6)-C(7)-C(8)   | 120.69(13) |

|                     |            |
|---------------------|------------|
| C(6)-C(7)-H(7A)     | 119.7      |
| C(8)-C(7)-H(7A)     | 119.7      |
| C(7)-C(8)-C(3)      | 119.97(12) |
| C(7)-C(8)-C(9)      | 118.90(11) |
| C(3)-C(8)-C(9)      | 121.12(11) |
| O(1)-C(9)-N         | 106.17(10) |
| O(1)-C(9)-C(8)      | 110.05(10) |
| N-C(9)-C(8)         | 115.05(10) |
| O(1)-C(9)-H(9A)     | 108.5      |
| N-C(9)-H(9A)        | 108.5      |
| C(8)-C(9)-H(9A)     | 108.5      |
| O(1)-C(10)-C(11)    | 105.75(10) |
| O(1)-C(10)-H(10A)   | 110.6      |
| C(11)-C(10)-H(10A)  | 110.6      |
| O(1)-C(10)-H(10B)   | 110.6      |
| C(11)-C(10)-H(10B)  | 110.6      |
| H(10A)-C(10)-H(10B) | 108.7      |
| N-C(11)-C(12)       | 109.39(10) |
| N-C(11)-C(10)       | 104.48(10) |
| C(12)-C(11)-C(10)   | 113.30(11) |
| N-C(11)-H(11A)      | 109.8      |
| C(12)-C(11)-H(11A)  | 109.8      |
| C(10)-C(11)-H(11A)  | 109.8      |
| C(13)-C(12)-C(11)   | 112.00(11) |
| C(13)-C(12)-H(12A)  | 109.2      |
| C(11)-C(12)-H(12A)  | 109.2      |
| C(13)-C(12)-H(12B)  | 109.2      |
| C(11)-C(12)-H(12B)  | 109.2      |
| H(12A)-C(12)-H(12B) | 107.9      |
| O(2)-C(13)-C(14)    | 119.83(13) |
| O(2)-C(13)-C(12)    | 120.77(12) |
| C(14)-C(13)-C(12)   | 119.40(11) |
| C(15)-C(14)-C(19)   | 118.79(13) |
| C(15)-C(14)-C(13)   | 123.12(13) |
| C(19)-C(14)-C(13)   | 118.08(12) |
| C(14)-C(15)-C(16)   | 120.14(16) |
| C(14)-C(15)-H(15A)  | 119.9      |
| C(16)-C(15)-H(15A)  | 119.9      |

|                    |            |
|--------------------|------------|
| C(17)-C(16)-C(15)  | 119.99(16) |
| C(17)-C(16)-H(16A) | 120.0      |
| C(15)-C(16)-H(16A) | 120.0      |
| C(18)-C(17)-C(16)  | 120.68(16) |
| C(18)-C(17)-H(17A) | 119.7      |
| C(16)-C(17)-H(17A) | 119.7      |
| C(17)-C(18)-C(19)  | 119.22(17) |
| C(17)-C(18)-H(18A) | 120.4      |
| C(19)-C(18)-H(18A) | 120.4      |
| C(18)-C(19)-C(14)  | 121.16(15) |
| C(18)-C(19)-H(19A) | 119.4      |
| C(14)-C(19)-H(19A) | 119.4      |

---

Symmetry transformations used to generate equivalent atoms:

Table 4. Anisotropic displacement parameters ( $\text{\AA}^2 \times 10^3$ ) for 5c. The anisotropic displacement factor exponent takes the form:  $-2\pi^2 [ h^2 a^{*2} U^{11} + \dots + 2 h k a^* b^* U^{12} ]$

|       | U <sup>11</sup> | U <sup>22</sup> | U <sup>33</sup> | U <sup>23</sup> | U <sup>13</sup> | U <sup>12</sup> |
|-------|-----------------|-----------------|-----------------|-----------------|-----------------|-----------------|
| O(1)  | 18(1)           | 29(1)           | 36(1)           | -5(1)           | -2(1)           | -1(1)           |
| O(2)  | 56(1)           | 24(1)           | 40(1)           | 5(1)            | 1(1)            | 2(1)            |
| N     | 20(1)           | 20(1)           | 26(1)           | 0(1)            | 3(1)            | 3(1)            |
| C(1)  | 29(1)           | 23(1)           | 27(1)           | 4(1)            | 2(1)            | 7(1)            |
| C(2)  | 25(1)           | 34(1)           | 30(1)           | 2(1)            | 1(1)            | 12(1)           |
| C(3)  | 21(1)           | 23(1)           | 28(1)           | -2(1)           | 1(1)            | -1(1)           |
| C(4)  | 24(1)           | 35(1)           | 34(1)           | -5(1)           | 4(1)            | 2(1)            |
| C(5)  | 36(1)           | 40(1)           | 32(1)           | -8(1)           | 11(1)           | -7(1)           |
| C(6)  | 44(1)           | 31(1)           | 26(1)           | 1(1)            | 2(1)            | -9(1)           |
| C(7)  | 31(1)           | 22(1)           | 29(1)           | 1(1)            | -4(1)           | -4(1)           |
| C(8)  | 21(1)           | 17(1)           | 26(1)           | -2(1)           | 0(1)            | -3(1)           |
| C(9)  | 17(1)           | 18(1)           | 29(1)           | -1(1)           | -2(1)           | 0(1)            |
| C(10) | 20(1)           | 34(1)           | 44(1)           | -4(1)           | 5(1)            | 2(1)            |
| C(11) | 22(1)           | 24(1)           | 34(1)           | 0(1)            | 8(1)            | 2(1)            |
| C(12) | 29(1)           | 27(1)           | 36(1)           | -2(1)           | 8(1)            | 6(1)            |
| C(13) | 32(1)           | 25(1)           | 29(1)           | 2(1)            | 13(1)           | 2(1)            |
| C(14) | 34(1)           | 25(1)           | 27(1)           | 0(1)            | 15(1)           | 0(1)            |
| C(15) | 52(1)           | 28(1)           | 39(1)           | 0(1)            | 10(1)           | 7(1)            |
| C(16) | 76(1)           | 24(1)           | 55(1)           | -2(1)           | 21(1)           | 4(1)            |
| C(17) | 67(1)           | 37(1)           | 58(1)           | -20(1)          | 18(1)           | -12(1)          |
| C(18) | 60(1)           | 48(1)           | 48(1)           | -16(1)          | 1(1)            | -2(1)           |
| C(19) | 51(1)           | 34(1)           | 32(1)           | -3(1)           | 6(1)            | 4(1)            |

Table 5. Hydrogen coordinates ( $\times 10^4$ ) and isotropic displacement parameters ( $\text{\AA}^2 \times 10^{-3}$ ) for 5c.

|        | x     | y     | z    | U(eq) |
|--------|-------|-------|------|-------|
| H(1A)  | 7261  | 9363  | 1298 | 31    |
| H(1B)  | 8258  | 9858  | 1898 | 31    |
| H(2A)  | 5388  | 10191 | 1991 | 35    |
| H(2B)  | 5035  | 8336  | 1784 | 35    |
| H(4A)  | 4089  | 9591  | 2920 | 37    |
| H(5A)  | 4581  | 8742  | 3873 | 42    |
| H(6A)  | 6916  | 7128  | 4150 | 40    |
| H(7A)  | 8687  | 6290  | 3461 | 33    |
| H(9A)  | 8770  | 5714  | 2372 | 26    |
| H(10A) | 11745 | 6242  | 2025 | 39    |
| H(10B) | 11974 | 8181  | 1920 | 39    |
| H(11A) | 9906  | 8198  | 1213 | 32    |
| H(12A) | 10923 | 5423  | 1027 | 36    |
| H(12B) | 9446  | 4733  | 1382 | 36    |
| H(15A) | 9486  | 2532  | 788  | 47    |
| H(16A) | 8466  | 161   | 314  | 61    |
| H(17A) | 6367  | 359   | -430 | 64    |
| H(18A) | 5348  | 2920  | -736 | 63    |
| H(19A) | 6403  | 5290  | -279 | 47    |

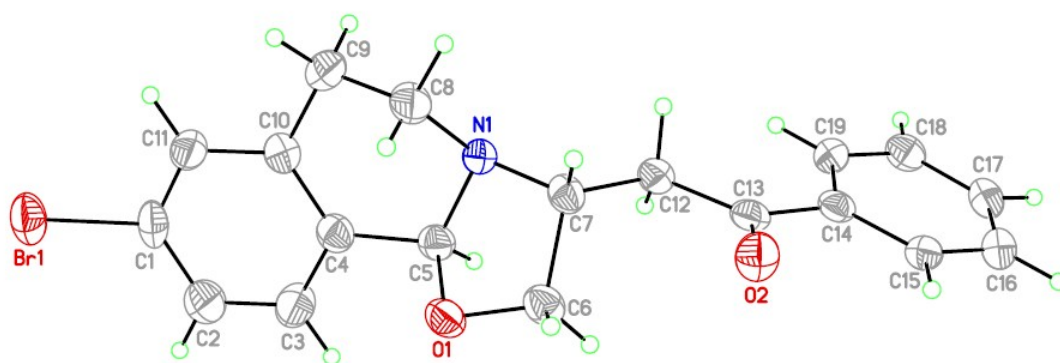

**Figure S95.** X-ray Crystallographic Data of compound **31**.

Table 6. Crystal data and structure refinement for **31**.

|                                   |                                                     |          |
|-----------------------------------|-----------------------------------------------------|----------|
| Identification code               | ic17273                                             |          |
| Empirical formula                 | C <sub>19</sub> H <sub>18</sub> Br N O <sub>2</sub> |          |
| Formula weight                    | 372.25                                              |          |
| Temperature                       | 200(2) K                                            |          |
| Wavelength                        | 1.54178 Å                                           |          |
| Crystal system                    | Orthorhombic                                        |          |
| Space group                       | Pbca                                                |          |
| Unit cell dimensions              | a = 10.9980(5) Å                                    | α = 90°. |
|                                   | b = 7.5779(3) Å                                     | β = 90°. |
|                                   | c = 38.7212(13) Å                                   | γ = 90°. |
| Volume                            | 3227.1(2) Å <sup>3</sup>                            |          |
| Z                                 | 8                                                   |          |
| Density (calculated)              | 1.532 Mg/m <sup>3</sup>                             |          |
| Absorption coefficient            | 3.545 mm <sup>-1</sup>                              |          |
| F(000)                            | 1520                                                |          |
| Crystal size                      | 0.20 x 0.15 x 0.10 mm <sup>3</sup>                  |          |
| Theta range for data collection   | 4.62 to 67.99°.                                     |          |
| Index ranges                      | -8 ≤ h ≤ 13, -9 ≤ k ≤ 8, -46 ≤ l ≤ 42               |          |
| Reflections collected             | 6271                                                |          |
| Independent reflections           | 2903 [R(int) = 0.0402]                              |          |
| Completeness to theta = 67.99°    | 99.0 %                                              |          |
| Absorption correction             | Semi-empirical from equivalents                     |          |
| Max. and min. transmission        | 1.00000 and 0.77316                                 |          |
| Refinement method                 | Full-matrix least-squares on F <sup>2</sup>         |          |
| Data / restraints / parameters    | 2903 / 0 / 208                                      |          |
| Goodness-of-fit on F <sup>2</sup> | 0.934                                               |          |



Final R indices [ $I > 2\sigma(I)$ ]

R1 = 0.0473, wR2 = 0.1262

R indices (all data)

R1 = 0.0718, wR2 = 0.1514

Largest diff. peak and hole

0.570 and -0.375 e.Å<sup>-3</sup>

Table 7. Atomic coordinates ( $\times 10^4$ ) and equivalent isotropic displacement parameters ( $\text{\AA}^2 \times 10^3$ ) for **3I**.  $U(\text{eq})$  is defined as one third of the trace of the orthogonalized  $U^{ij}$  tensor.

|       | x        | y        | z        | U(eq) |
|-------|----------|----------|----------|-------|
| Br(1) | 8533(1)  | 1435(1)  | 7296(1)  | 47(1) |
| O(1)  | 11746(2) | -1855(4) | 8626(1)  | 33(1) |
| O(2)  | 12339(2) | -4706(4) | 9600(1)  | 38(1) |
| N(1)  | 9893(3)  | -2840(5) | 8833(1)  | 29(1) |
| C(1)  | 9102(4)  | 637(6)   | 7734(1)  | 35(1) |
| C(2)  | 10007(4) | 1564(7)  | 7901(1)  | 44(1) |
| C(3)  | 10420(4) | 930(6)   | 8214(1)  | 41(1) |
| C(4)  | 9971(3)  | -626(5)  | 8353(1)  | 31(1) |
| C(5)  | 10508(3) | -1320(5) | 8685(1)  | 28(1) |
| C(6)  | 12042(3) | -2832(6) | 8933(1)  | 32(1) |
| C(7)  | 10826(3) | -3609(5) | 9063(1)  | 28(1) |
| C(8)  | 9514(5)  | -4087(6) | 8562(1)  | 46(1) |
| C(9)  | 8591(5)  | -3242(7) | 8329(1)  | 57(2) |
| C(10) | 9057(4)  | -1530(6) | 8183(1)  | 37(1) |
| C(11) | 8624(4)  | -880(7)  | 7868(1)  | 37(1) |
| C(12) | 10549(3) | -3151(5) | 9440(1)  | 28(1) |
| C(13) | 11477(3) | -3820(5) | 9692(1)  | 29(1) |
| C(14) | 11323(3) | -3339(5) | 10067(1) | 26(1) |
| C(15) | 12247(3) | -3736(5) | 10300(1) | 30(1) |
| C(16) | 12156(4) | -3235(6) | 10643(1) | 36(1) |
| C(17) | 11125(4) | -2349(5) | 10756(1) | 33(1) |
| C(18) | 10188(4) | -1994(5) | 10532(1) | 32(1) |
| C(19) | 10288(3) | -2471(5) | 10187(1) | 30(1) |

Table 8. Bond lengths [ $\text{\AA}$ ] and angles [ $^\circ$ ] for **3I**.

---

|                  |          |
|------------------|----------|
| Br(1)-C(1)       | 1.906(4) |
| O(1)-C(5)        | 1.438(5) |
| O(1)-C(6)        | 1.437(5) |
| O(2)-C(13)       | 1.214(5) |
| N(1)-C(5)        | 1.454(5) |
| N(1)-C(8)        | 1.470(5) |
| N(1)-C(7)        | 1.480(5) |
| C(1)-C(11)       | 1.367(7) |
| C(1)-C(2)        | 1.381(6) |
| C(2)-C(3)        | 1.378(6) |
| C(3)-C(4)        | 1.388(6) |
| C(4)-C(10)       | 1.385(6) |
| C(4)-C(5)        | 1.507(5) |
| C(6)-C(7)        | 1.546(5) |
| C(7)-C(12)       | 1.530(5) |
| C(8)-C(9)        | 1.502(7) |
| C(9)-C(10)       | 1.506(6) |
| C(10)-C(11)      | 1.397(6) |
| C(12)-C(13)      | 1.500(5) |
| C(13)-C(14)      | 1.505(6) |
| C(14)-C(15)      | 1.392(5) |
| C(14)-C(19)      | 1.395(5) |
| C(15)-C(16)      | 1.383(6) |
| C(16)-C(17)      | 1.388(6) |
| C(17)-C(18)      | 1.374(6) |
| C(18)-C(19)      | 1.390(6) |
| <br>             |          |
| C(5)-O(1)-C(6)   | 103.3(3) |
| C(5)-N(1)-C(8)   | 111.1(3) |
| C(5)-N(1)-C(7)   | 103.1(3) |
| C(8)-N(1)-C(7)   | 111.9(3) |
| C(11)-C(1)-C(2)  | 121.8(4) |
| C(11)-C(1)-Br(1) | 118.6(3) |
| C(2)-C(1)-Br(1)  | 119.5(4) |
| C(3)-C(2)-C(1)   | 118.2(4) |
| C(2)-C(3)-C(4)   | 121.4(4) |

|                   |          |
|-------------------|----------|
| C(3)-C(4)-C(10)   | 119.5(4) |
| C(3)-C(4)-C(5)    | 119.3(4) |
| C(10)-C(4)-C(5)   | 121.2(4) |
| O(1)-C(5)-N(1)    | 106.2(3) |
| O(1)-C(5)-C(4)    | 109.6(3) |
| N(1)-C(5)-C(4)    | 115.4(3) |
| O(1)-C(6)-C(7)    | 105.7(3) |
| N(1)-C(7)-C(12)   | 110.4(3) |
| N(1)-C(7)-C(6)    | 104.7(3) |
| C(12)-C(7)-C(6)   | 113.4(3) |
| N(1)-C(8)-C(9)    | 110.2(4) |
| C(10)-C(9)-C(8)   | 111.4(4) |
| C(11)-C(10)-C(4)  | 119.3(4) |
| C(11)-C(10)-C(9)  | 121.1(4) |
| C(4)-C(10)-C(9)   | 119.5(4) |
| C(1)-C(11)-C(10)  | 119.8(4) |
| C(13)-C(12)-C(7)  | 114.1(3) |
| O(2)-C(13)-C(12)  | 121.9(4) |
| O(2)-C(13)-C(14)  | 120.2(4) |
| C(12)-C(13)-C(14) | 117.9(3) |
| C(15)-C(14)-C(19) | 118.8(4) |
| C(15)-C(14)-C(13) | 119.4(3) |
| C(19)-C(14)-C(13) | 121.8(3) |
| C(14)-C(15)-C(16) | 120.7(4) |
| C(17)-C(16)-C(15) | 119.6(4) |
| C(18)-C(17)-C(16) | 120.5(4) |
| C(17)-C(18)-C(19) | 119.8(4) |
| C(18)-C(19)-C(14) | 120.5(4) |

---

Symmetry transformations used to generate equivalent atoms:

Table 9. Anisotropic displacement parameters ( $\text{\AA}^2 \times 10^3$ ) for **3I**. The anisotropic displacement factor exponent takes the form:  $-2\pi^2 [ h^2 a^{*2} U^{11} + \dots + 2 h k a^* b^* U^{12} ]$

|       | $U^{11}$ | $U^{22}$ | $U^{33}$ | $U^{23}$ | $U^{13}$ | $U^{12}$ |
|-------|----------|----------|----------|----------|----------|----------|
| Br(1) | 49(1)    | 63(1)    | 29(1)    | 7(1)     | -2(1)    | 12(1)    |
| O(1)  | 30(1)    | 38(2)    | 31(1)    | 5(1)     | 6(1)     | -1(1)    |
| O(2)  | 35(2)    | 43(2)    | 35(2)    | -1(1)    | 1(1)     | 10(1)    |
| N(1)  | 30(2)    | 36(2)    | 23(2)    | 0(1)     | -1(1)    | -8(2)    |
| C(1)  | 35(2)    | 50(3)    | 20(2)    | 2(2)     | 0(2)     | 16(2)    |
| C(2)  | 48(3)    | 42(3)    | 41(2)    | 7(2)     | -2(2)    | -4(2)    |
| C(3)  | 47(2)    | 37(2)    | 38(2)    | 2(2)     | -10(2)   | -4(2)    |
| C(4)  | 31(2)    | 33(2)    | 28(2)    | -2(2)    | 4(2)     | 1(2)     |
| C(5)  | 29(2)    | 30(2)    | 26(2)    | -4(2)    | 4(2)     | -3(2)    |
| C(6)  | 29(2)    | 35(2)    | 33(2)    | 5(2)     | 5(2)     | 4(2)     |
| C(7)  | 33(2)    | 27(2)    | 24(2)    | -1(2)    | 3(2)     | -1(2)    |
| C(8)  | 65(3)    | 37(3)    | 36(2)    | 8(2)     | -9(2)    | -28(2)   |
| C(9)  | 60(3)    | 69(4)    | 41(3)    | 15(3)    | -19(2)   | -35(3)   |
| C(10) | 36(2)    | 46(3)    | 27(2)    | 1(2)     | 2(2)     | -6(2)    |
| C(11) | 31(2)    | 52(3)    | 28(2)    | -5(2)    | -1(2)    | -3(2)    |
| C(12) | 28(2)    | 32(2)    | 26(2)    | 0(2)     | 3(2)     | -2(2)    |
| C(13) | 28(2)    | 28(2)    | 31(2)    | 3(2)     | 3(2)     | -9(2)    |
| C(14) | 27(2)    | 22(2)    | 31(2)    | 5(2)     | 2(2)     | -5(2)    |
| C(15) | 24(2)    | 33(2)    | 31(2)    | 5(2)     | 1(2)     | -2(2)    |
| C(16) | 36(2)    | 42(2)    | 29(2)    | 8(2)     | -3(2)    | -2(2)    |
| C(17) | 40(2)    | 30(2)    | 28(2)    | 4(2)     | 2(2)     | -1(2)    |
| C(18) | 32(2)    | 30(2)    | 34(2)    | 1(2)     | 7(2)     | 2(2)     |
| C(19) | 26(2)    | 33(2)    | 29(2)    | 3(2)     | -1(2)    | -1(2)    |
